# Supplementary material for: Reactions of mono- and bicyclic enol ethers with the I2–hydroperoxide system
Source: Royal Society of Chemistry journal article supplement (doi:10.1039/c3ra46462h), 2014-01-01
Supplement: c3ra46462h.pdf [file c3ra46462h.pdf]

# **Supporting Information**

## **Reactions of Mono- and Bicyclic Enol Ethers**

### **with the I<sub>2</sub> – Hydroperoxide System**

**Alexander O. Terent'ev, Alexander T. Zdvizhkov, Alena N. Kulakova, Roman A. Novikov,  
Ashot V. Arzumanyan, and Gennady I. Nikishin**

N.D. Zelinsky Institute of Organic Chemistry, Russian Academy of Sciences,  
47 Leninsky prosp., 119991 Moscow, Russian Federation

## Table of contents

|                                       |     |
|---------------------------------------|-----|
| Mixture <b>7a-9a</b> $^1\text{H}$     | S5  |
| Mixture <b>7a-9a</b> $^{13}\text{C}$  | S6  |
| Mixture <b>7a-9a</b> editing HSQC     | S7  |
| Mixture <b>7a-9a</b> HSQC-TOCSY       | S8  |
| Mixture <b>7a-9a</b> COSY             | S9  |
| Mixture <b>7a-9a</b> HMBC             | S10 |
| Mixture <b>7b, 8b</b> $^1\text{H}$    | S11 |
| Mixture <b>7b, 8b</b> $^{13}\text{C}$ | S12 |
| Mixture <b>7b, 8b</b> editing HSQC    | S13 |
| Mixture <b>7b, 8b</b> HMBC            | S14 |
| Mixture <b>7b, 8b</b> HSQC-TOCSY      | S15 |
| Mixture <b>7b, 8b</b> COSY            | S16 |
| <b>5a</b> , $^1\text{H}$ NMR          | S17 |
| <b>5a</b> , $^{13}\text{C}$ NMR       | S18 |
| <b>5a</b> , HRMS                      | S19 |
| <b>5a</b> , IR                        | S20 |
| <b>5b</b> , $^1\text{H}$ NMR          | S21 |
| <b>5b</b> , $^{13}\text{C}$ NMR       | S22 |
| <b>5b</b> , HRMS                      | S23 |
| <b>5b</b> , IR                        | S24 |
| <b>6a</b> , $^1\text{H}$ NMR          | S25 |

|                                  |     |
|----------------------------------|-----|
| <b>6a</b> , <sup>13</sup> C NMR  | S26 |
| <b>6a</b> , HRMS                 | S27 |
| <b>6a</b> , IR                   | S28 |
| <b>6b</b> , <sup>1</sup> H NMR   | S29 |
| <b>6b</b> , <sup>13</sup> C NMR  | S30 |
| <b>6b</b> , HRMS                 | S31 |
| <b>6b</b> , IR                   | S32 |
| <b>10a</b> <sup>1</sup> H NMR    | S33 |
| <b>10a</b> , <sup>13</sup> C NMR | S34 |
| <b>10b</b> <sup>1</sup> H NMR    | S35 |
| <b>10b</b> , <sup>13</sup> C NMR | S36 |
| <b>10c</b> <sup>1</sup> H NMR    | S37 |
| <b>10c</b> , <sup>13</sup> C NMR | S38 |
| <b>11b</b> , <sup>1</sup> H NMR  | S39 |
| <b>11b</b> , <sup>13</sup> C NMR | S40 |
| <b>11b</b> , HRMS                | S41 |
| <b>11b</b> , IR                  | S42 |
| <b>11c</b> , <sup>1</sup> H NMR  | S43 |
| <b>11c</b> , <sup>13</sup> C NMR | S44 |
| <b>11c</b> , HRMS                | S45 |
| <b>11c</b> , IR                  | S46 |
| <b>12a</b> , <sup>1</sup> H NMR  | S47 |

|                                  |     |
|----------------------------------|-----|
| <b>12a</b> , $^{13}\text{C}$ NMR | S48 |
| <b>12a</b> , HRMS                | S49 |
| <b>12a</b> , IR                  | S50 |
| <b>12b</b> , $^1\text{H}$ NMR    | S51 |
| <b>12b</b> , $^{13}\text{C}$ NMR | S52 |
| <b>12b</b> , HRMS                | S53 |
| <b>12b</b> , IR                  | S54 |
| <b>12c</b> , $^1\text{H}$ NMR    | S55 |
| <b>12c</b> , $^{13}\text{C}$ NMR | S56 |
| <b>12c</b> , HRMS                | S57 |
| <b>12c</b> , IR                  | S58 |

<sup>1</sup>H NMR Mixture of products 7a-9a (reaction of 3,4-dihydrofuran 4a with I<sub>2</sub>/H<sub>2</sub>O<sub>2</sub> system)

4 Jul 2013

|                        |        |                |                        |                       |                      |
|------------------------|--------|----------------|------------------------|-----------------------|----------------------|
| Acquisition Time (sec) | 0.6759 | Comment        | BRUKER, AVANCE II, 300 | Date                  | 24 May 2013 05:11:28 |
| File Name              |        |                |                        |                       |                      |
| Frequency (MHz)        | 300.13 | Nucleus        | 1H                     | Number of Transients  | 1                    |
| Points Count           | 8192   | Pulse Sequence | zgq                    | Solvent               | CHLOROFORM-D         |
| Temperature (degree C) | 30.000 |                |                        | Original Points Count | 8124                 |
|                        |        |                |                        | Sweep Width (Hz)      | 6009.62              |

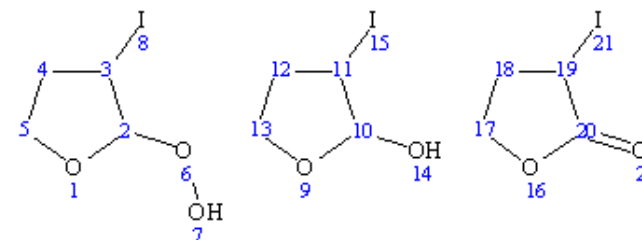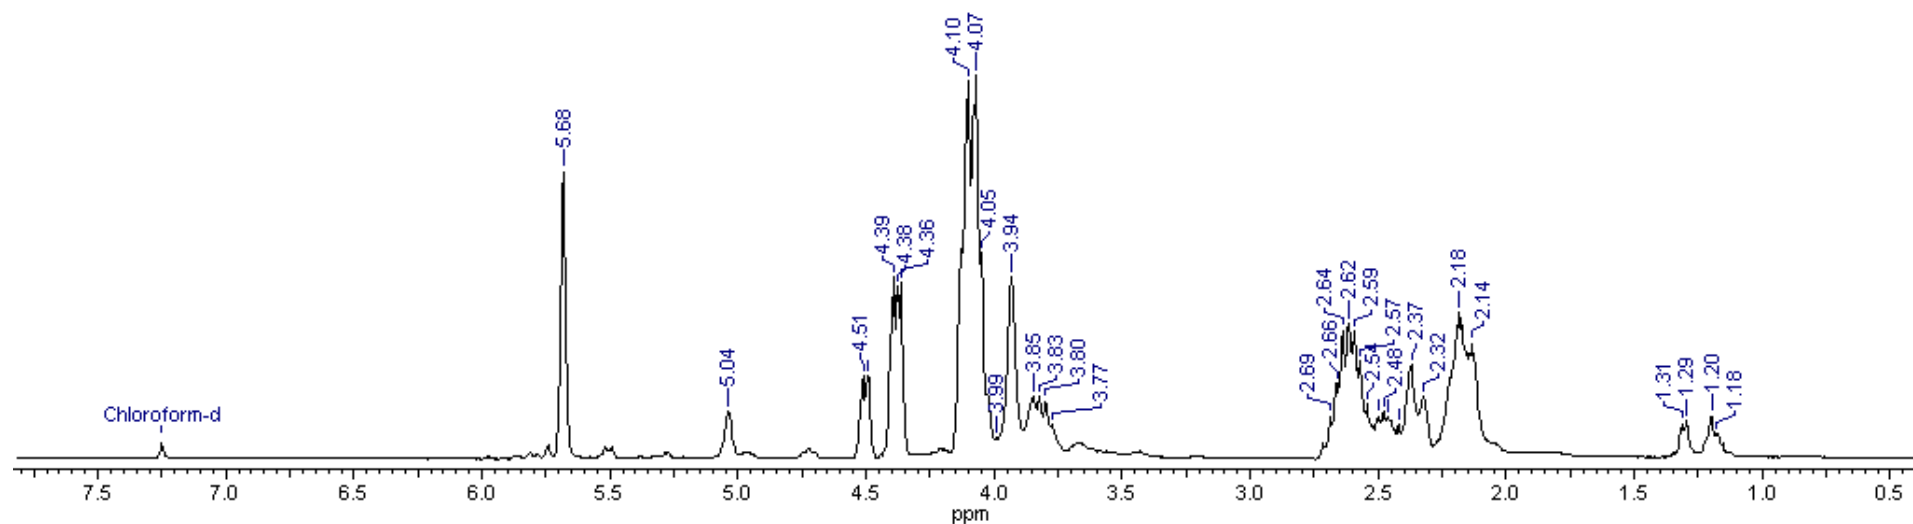

<sup>13</sup>C NMR Mixture of products 7a-9a (reaction of 3,4-dihydrofuran 4a with I<sub>2</sub>/H<sub>2</sub>O<sub>2</sub> system)

4 Jul 2013

|                               |              |                         |                        |                               |                      |
|-------------------------------|--------------|-------------------------|------------------------|-------------------------------|----------------------|
| <b>Acquisition Time (sec)</b> | 0.4503       | <b>Comment</b>          | BRUKER, AVANCE II, 300 | <b>Date</b>                   | 24 May 2013 05:11:28 |
| <b>File Name</b>              |              |                         |                        |                               |                      |
| <b>Frequency (MHz)</b>        | 75.48        | <b>Nucleus</b>          | 13C                    | <b>Number of Transients</b>   | 351                  |
| <b>Original Points Count</b>  | 16316        | <b>Points Count</b>     | 16384                  | <b>Pulse Sequence</b>         | zgpg30base           |
| <b>Solvent</b>                | CHLOROFORM-D | <b>Sweep Width (Hz)</b> | 18115.94               | <b>Temperature (degree C)</b> | 30.100               |

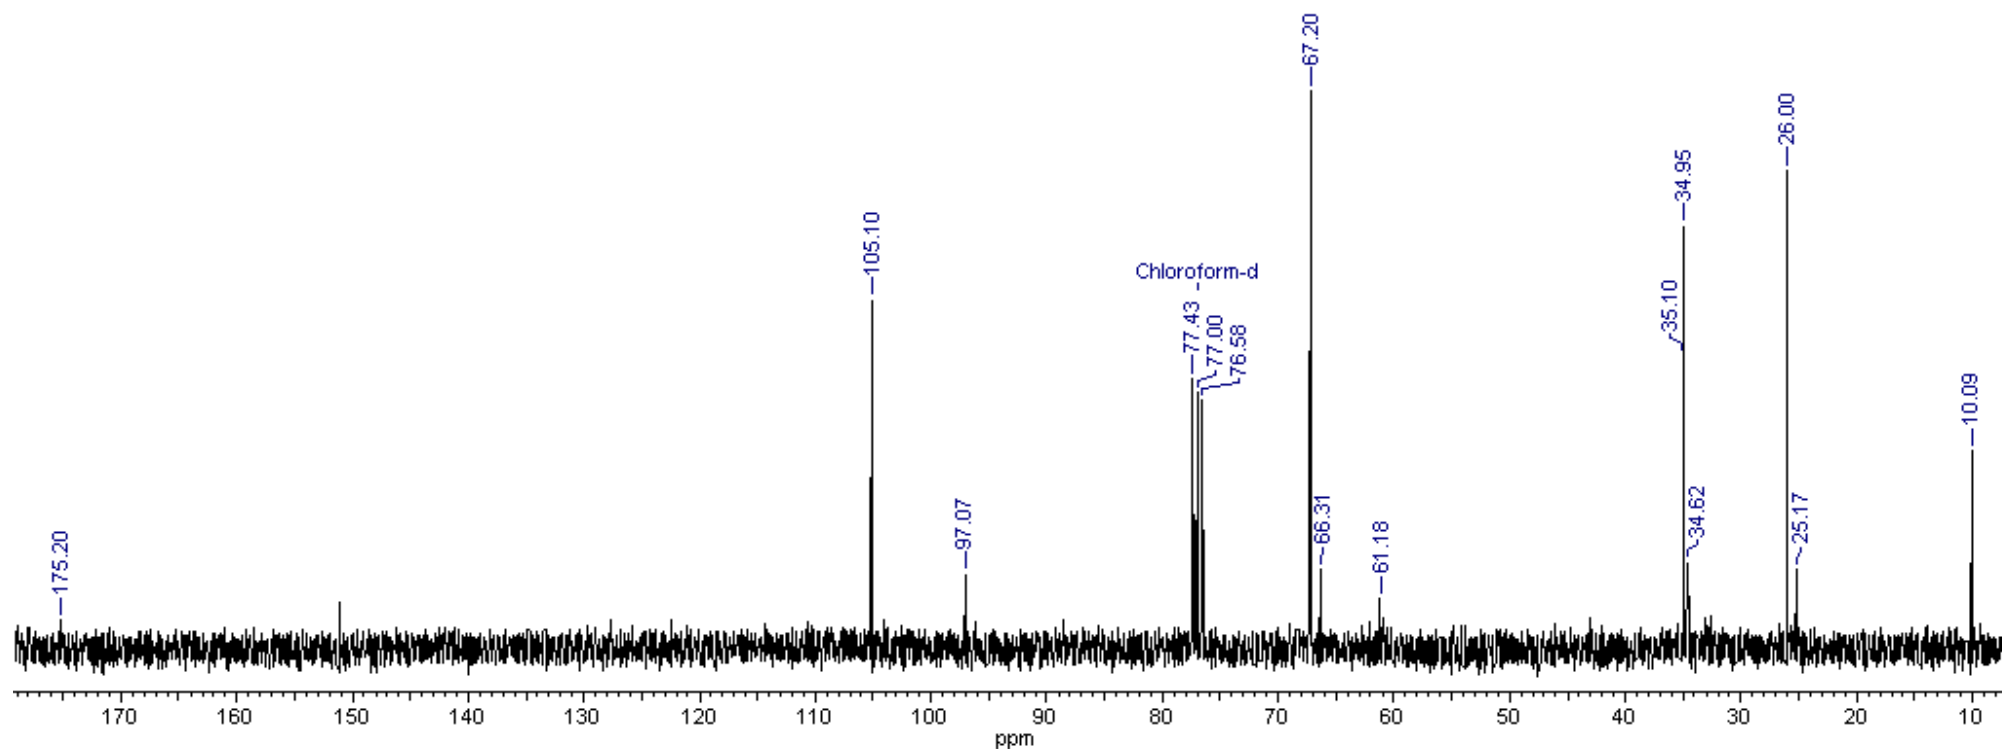

HSQC Mixture of products 7a-9a (reaction of 3,4-dihydrofuran 4a with I<sub>2</sub>/H<sub>2</sub>O<sub>2</sub> system)

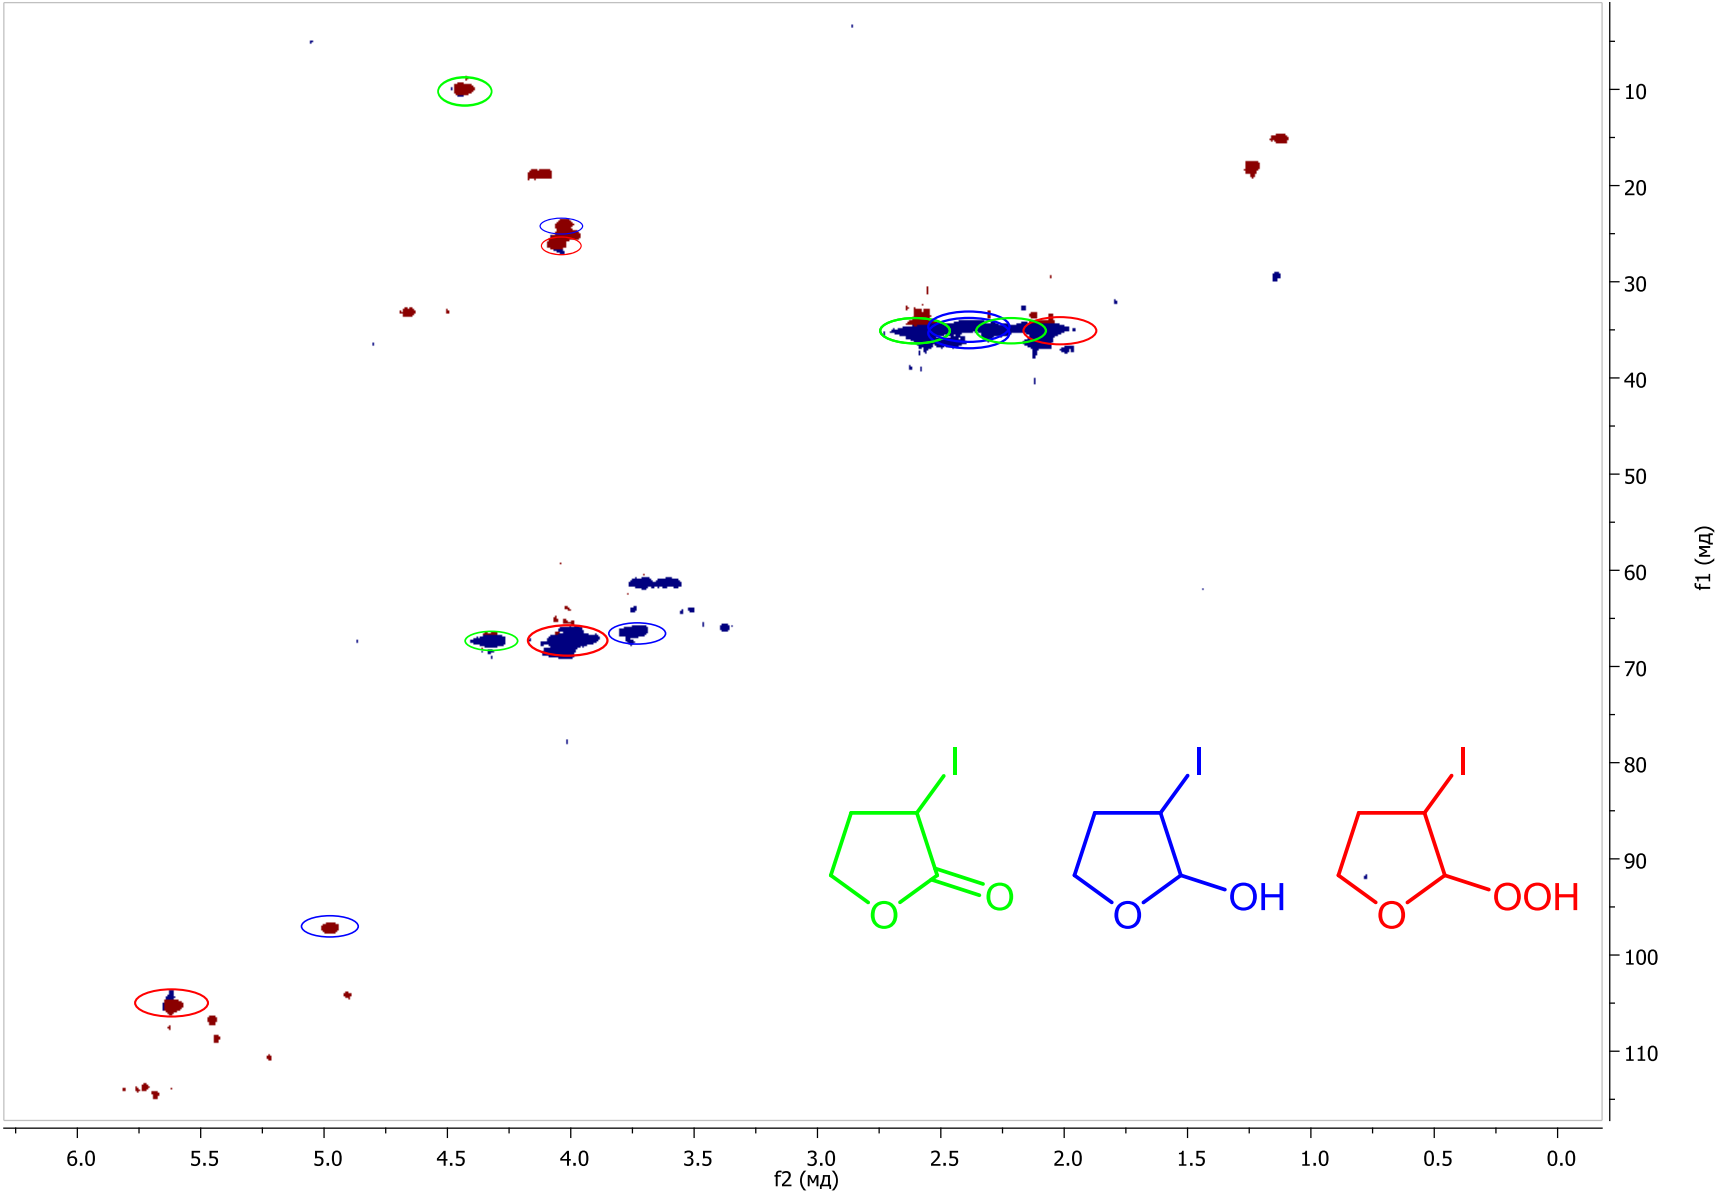

HSQC-TOCSY Mixture of products 7a-9a (reaction of 3,4-dihydrofuran 4a with I<sub>2</sub>/H<sub>2</sub>O<sub>2</sub> system)

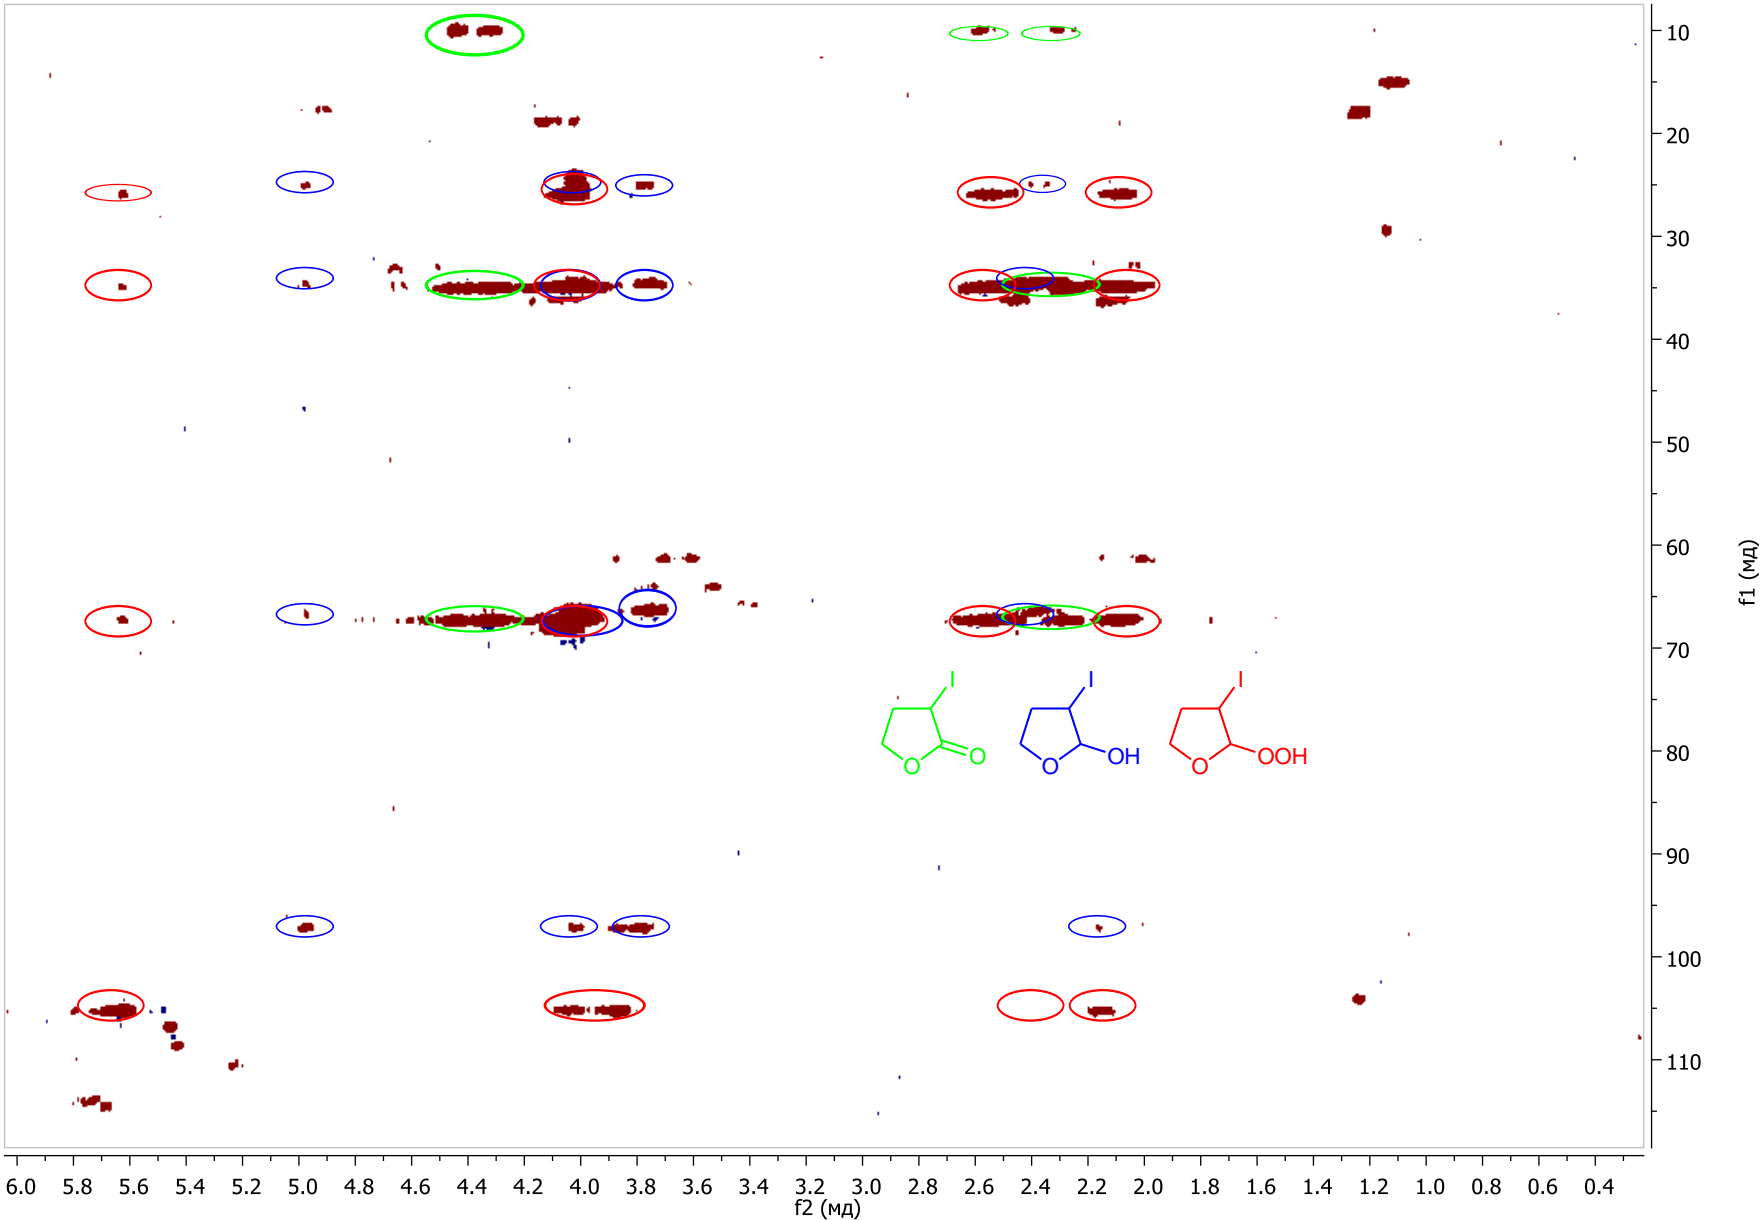



COSY Mixture of products 7a-9a (reaction of 3,4-dihydrofuran 4a with I<sub>2</sub>/H<sub>2</sub>O<sub>2</sub> system)

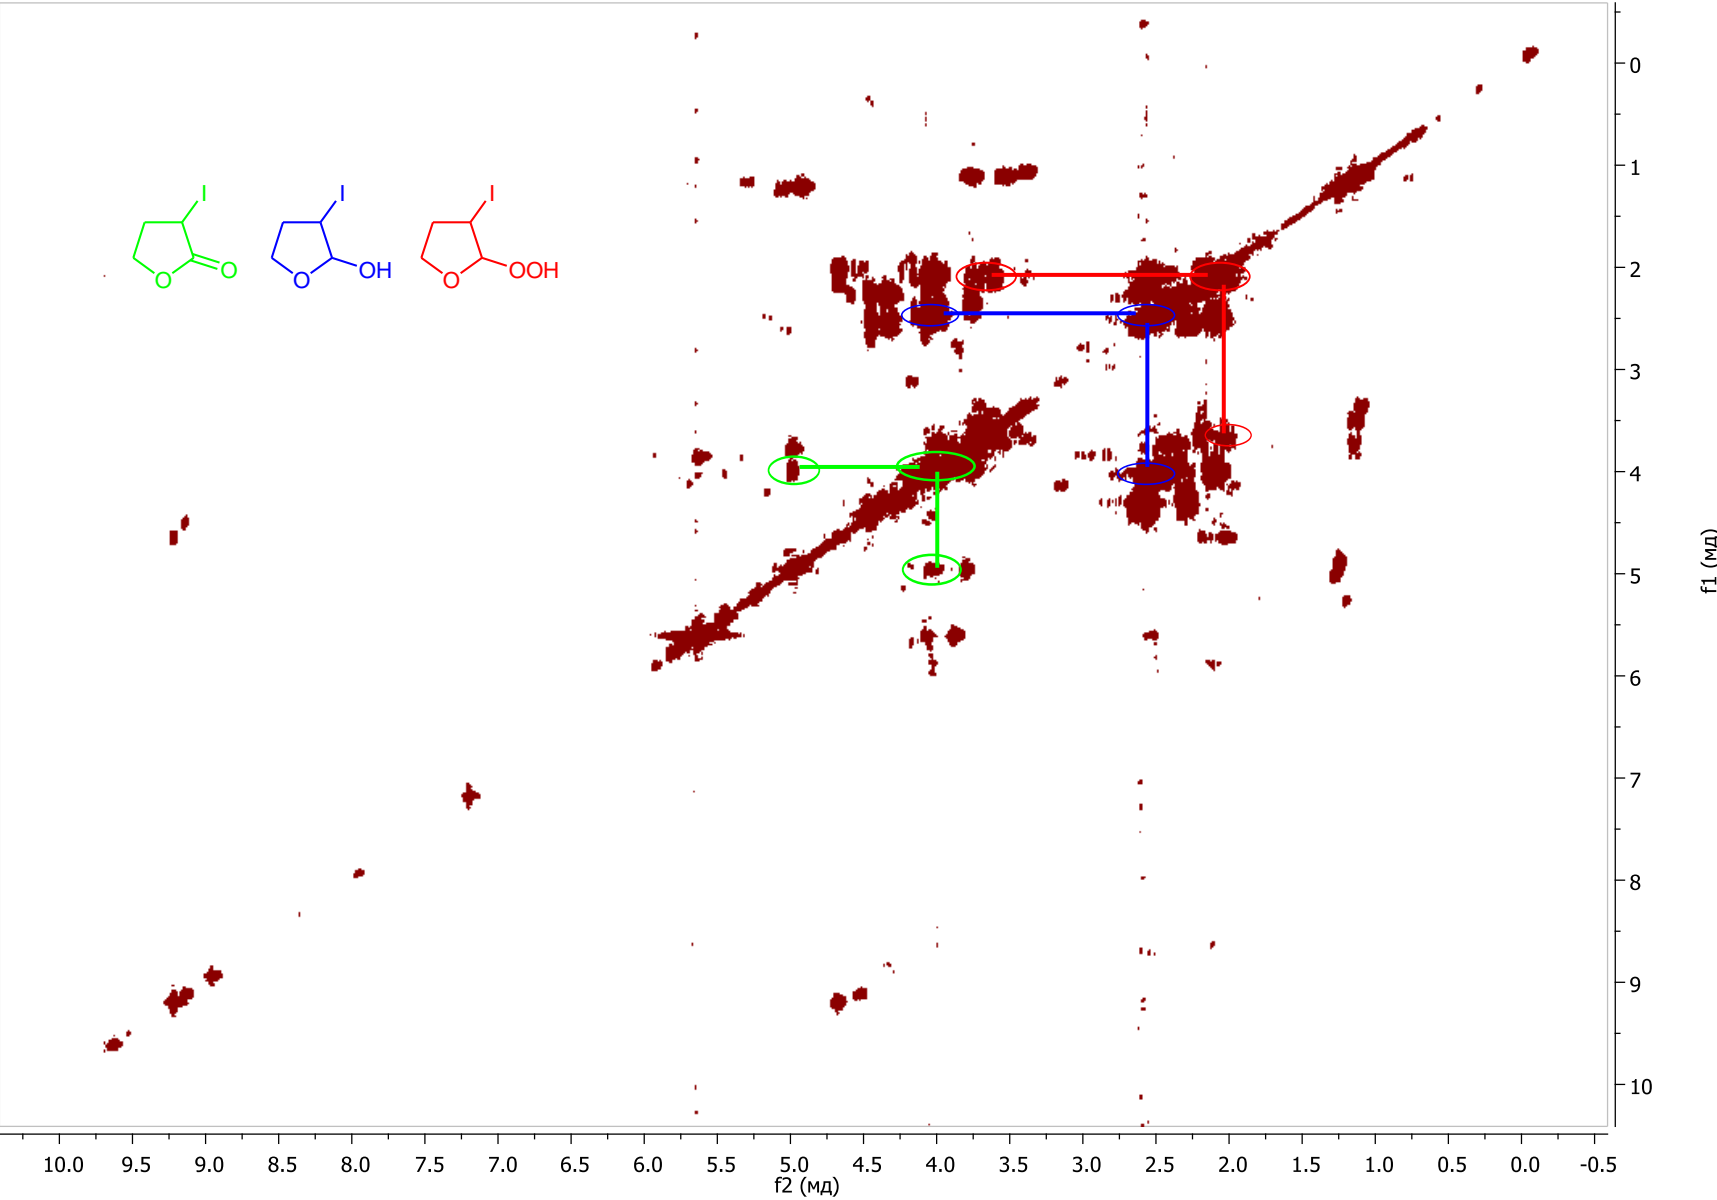

HMBC Mixture of products 7a-9a (reaction of 3,4-dihydrofuran 4a with I<sub>2</sub>/H<sub>2</sub>O<sub>2</sub> system)

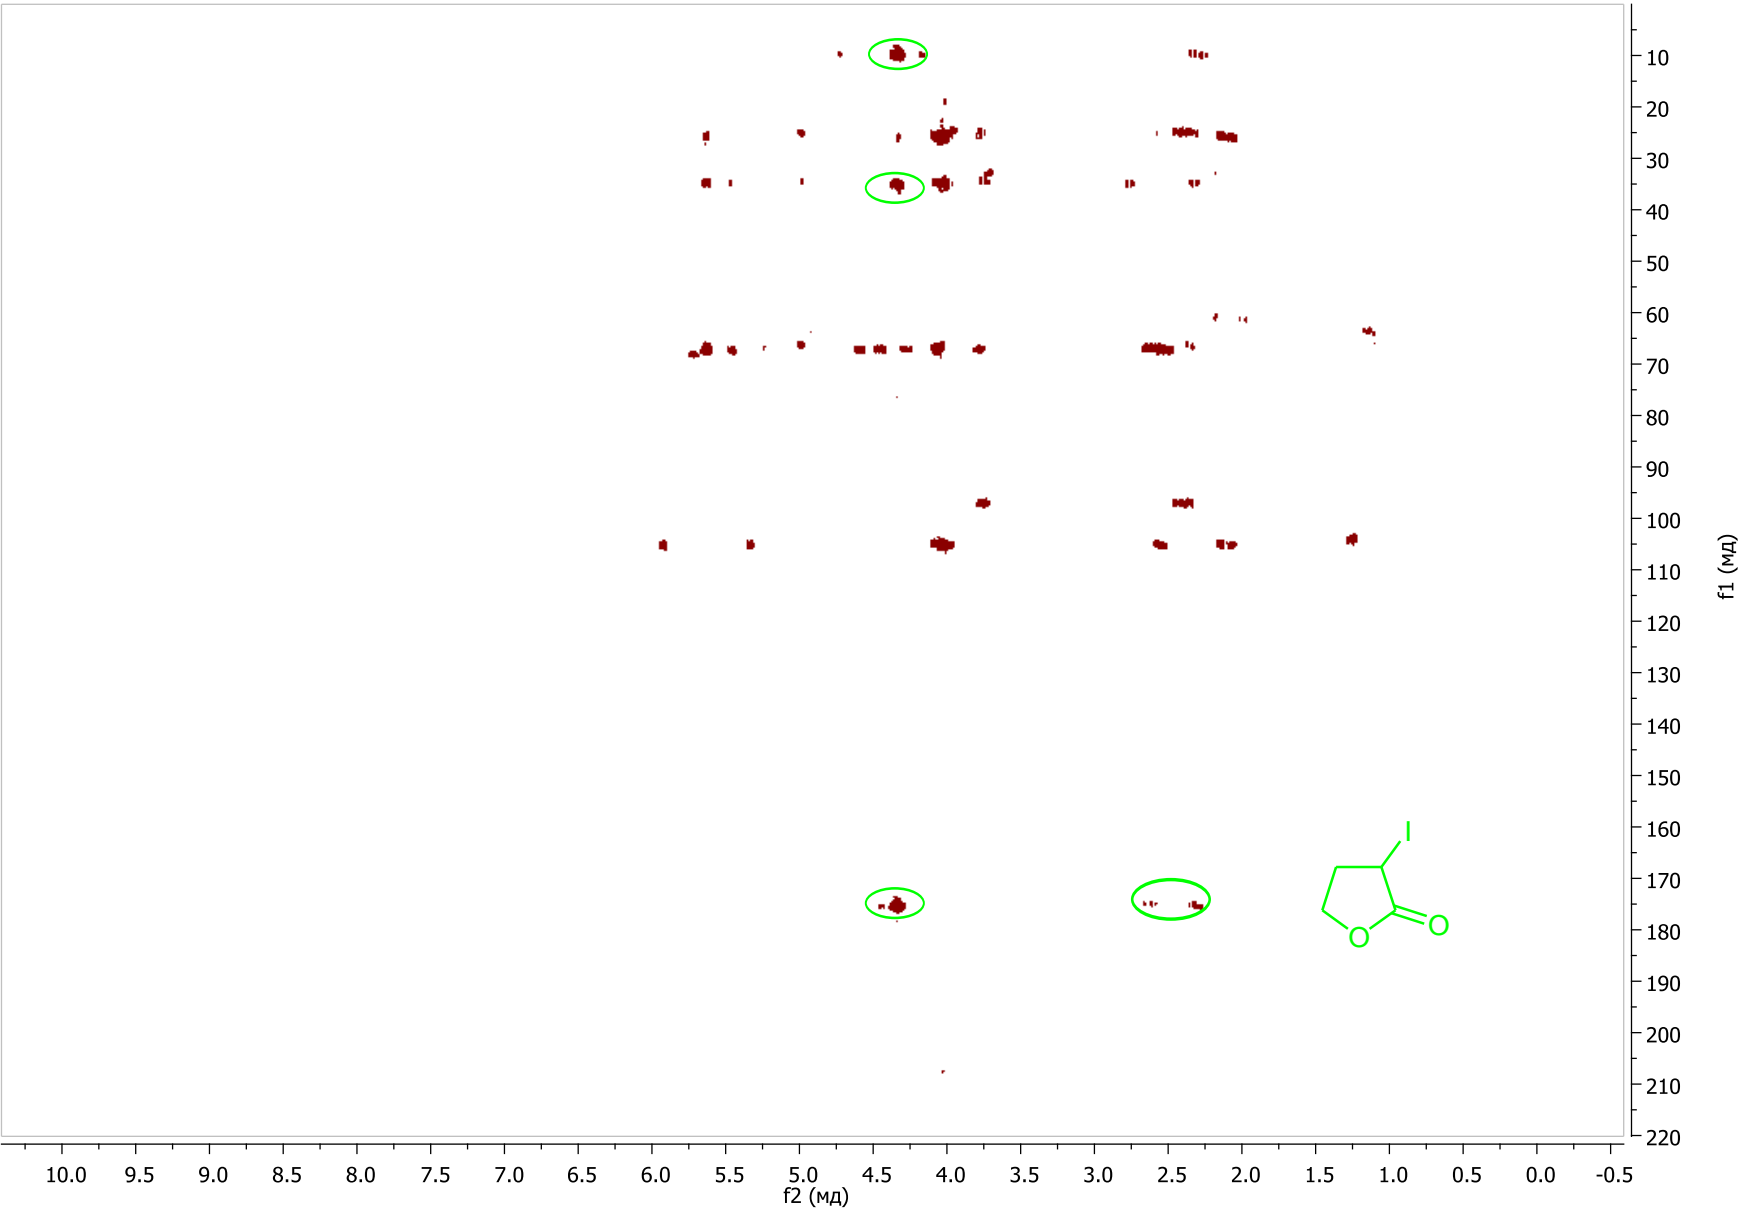

<sup>1</sup>H NMR Mixture of products 7b-8b (reaction of 3,4-dihydropyran 4b with I<sub>2</sub>/H<sub>2</sub>O<sub>2</sub> system)

4 Jul 2013

|                               |        |                             |                        |                               |                      |
|-------------------------------|--------|-----------------------------|------------------------|-------------------------------|----------------------|
| <b>Acquisition Time (sec)</b> | 0.6759 | <b>Comment</b>              | BRUKER, AVANCE II, 300 | <b>Date</b>                   | 24 May 2013 06:19:44 |
| <b>File Name</b>              |        |                             |                        | <b>Frequency (MHz)</b>        | 300.13               |
| <b>Nucleus</b>                | 1H     | <b>Number of Transients</b> | 1                      | <b>Original Points Count</b>  | 8124                 |
| <b>Pulse Sequence</b>         | zg     | <b>Solvent</b>              | CHLOROFORM-D           | <b>Sweep Width (Hz)</b>       | 6009.62              |
|                               |        |                             |                        | <b>Points Count</b>           | 8192                 |
|                               |        |                             |                        | <b>Temperature (degree C)</b> | 30.000               |

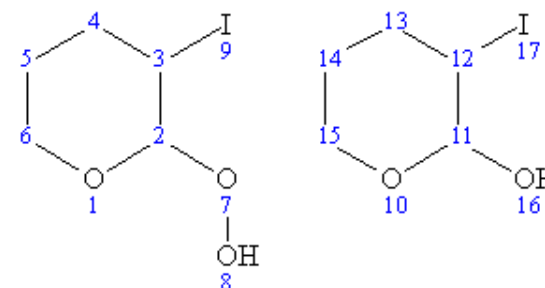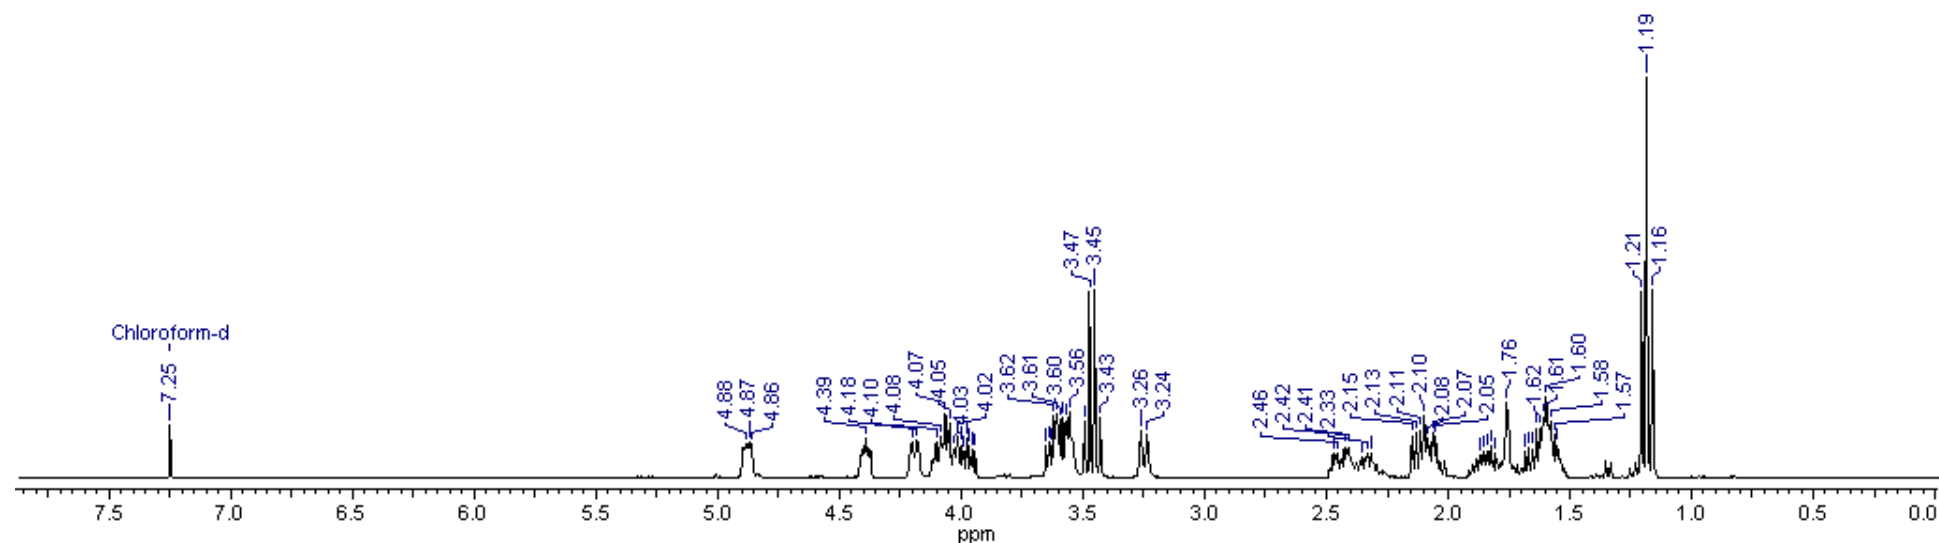

<sup>13</sup>C NMR Mixture of products 7b-8b (reaction of 3,4-dihydropyran 4b with I<sub>2</sub>/H<sub>2</sub>O<sub>2</sub> system)

26 Sep 2013

|                               |                      |                         |                         |                                      |
|-------------------------------|----------------------|-------------------------|-------------------------|--------------------------------------|
| <b>Acquisition Time (sec)</b> | 0.4503               | <b>Comment</b>          | BRUKER , AVANCE II, 300 |                                      |
| <b>Date</b>                   | 24 May 2013 06:19:44 |                         |                         |                                      |
| <b>File Name</b>              |                      |                         |                         |                                      |
| <b>Frequency (MHz)</b>        | 75.48                | <b>Nucleus</b>          | <sup>13</sup> C         | <b>Number of Transients</b> 350      |
| <b>Original Points Count</b>  | 16316                | <b>Points Count</b>     | 16384                   | <b>Pulse Sequence</b> zgpg30base     |
| <b>Solvent</b>                | CHLOROFORM-D         | <b>Sweep Width (Hz)</b> | 18115.94                | <b>Temperature (degree C)</b> 30.000 |

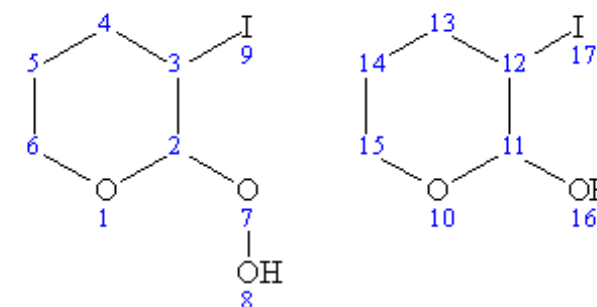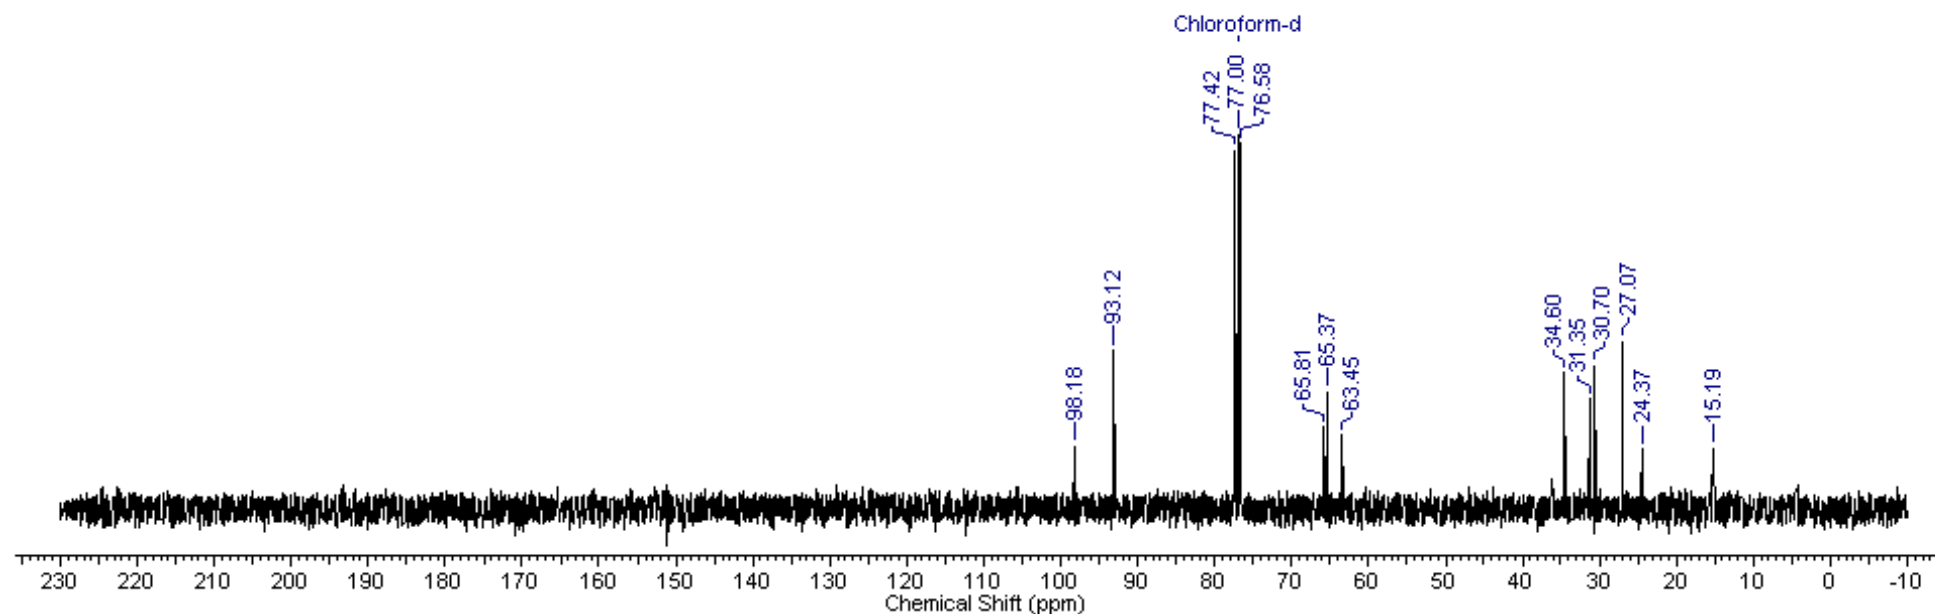

HSQC Mixture of products 7b-8b (reaction of 3,4-dihydropyran 4b with I<sub>2</sub>/H<sub>2</sub>O<sub>2</sub> system)

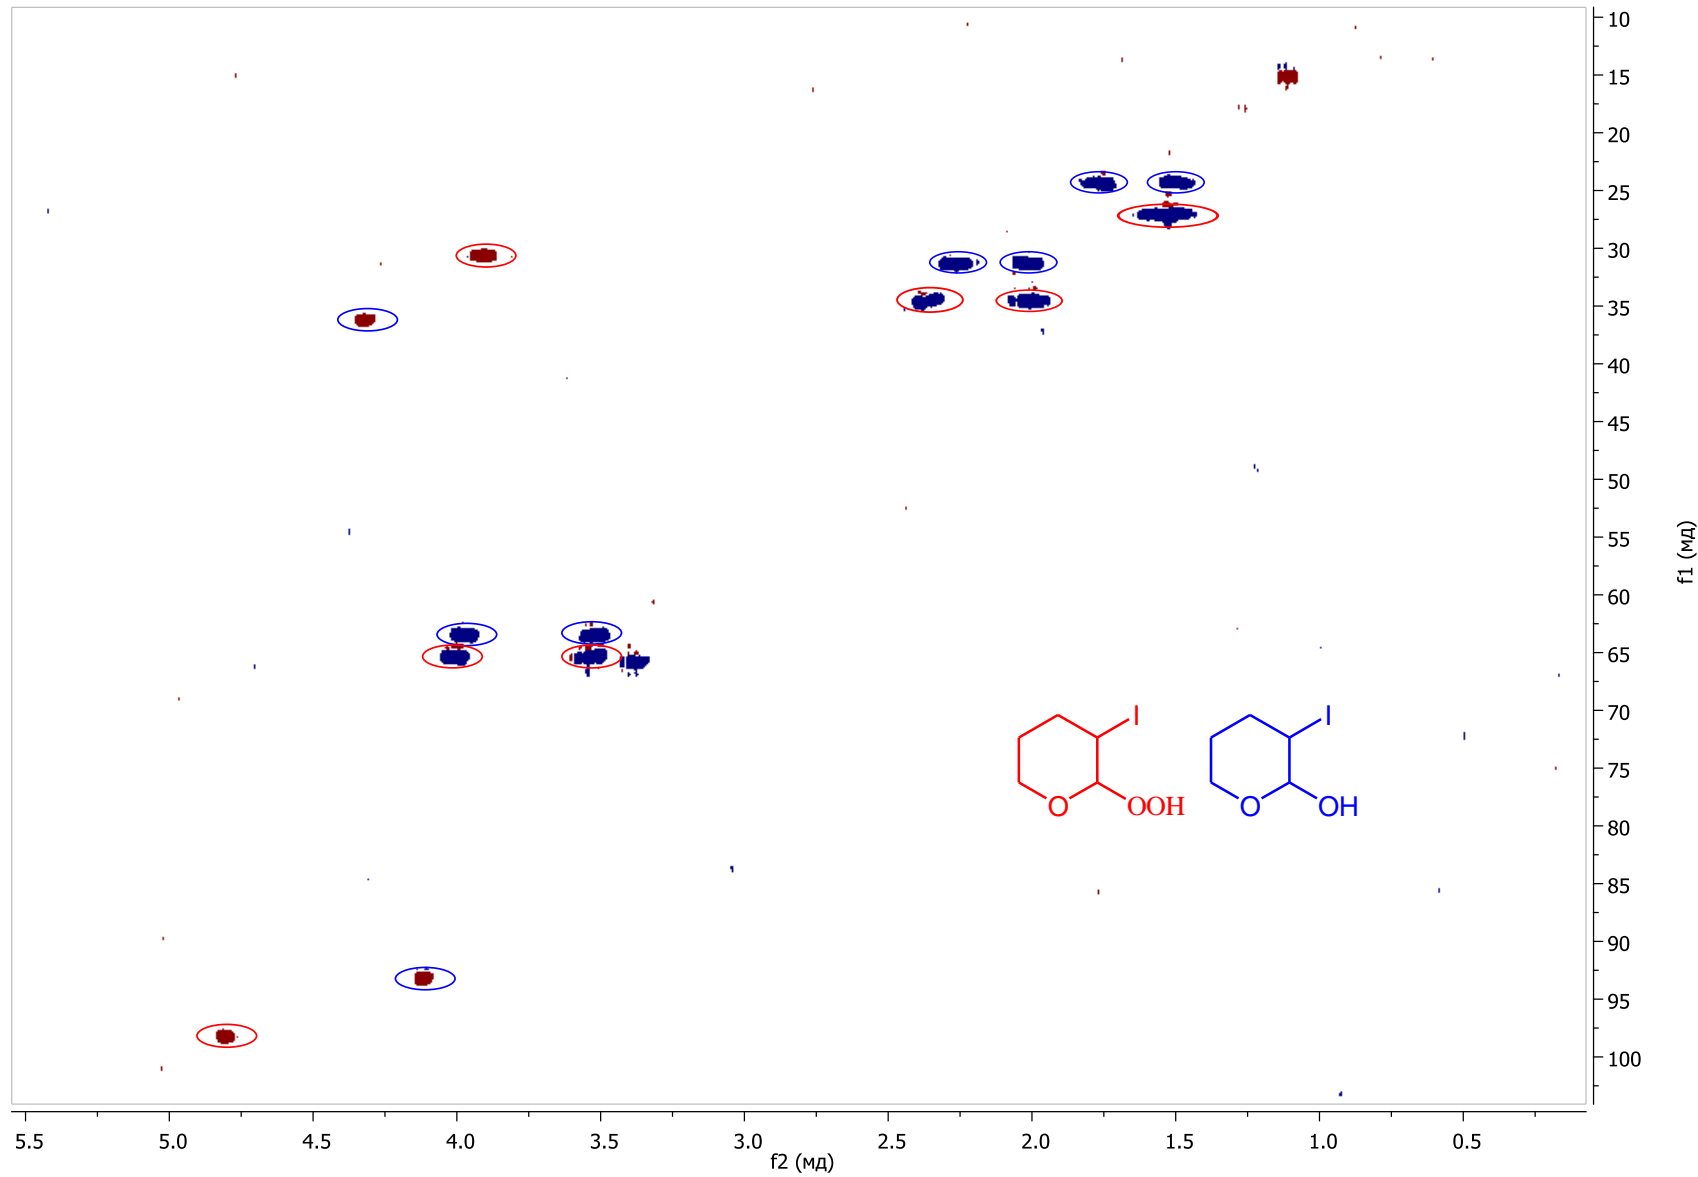

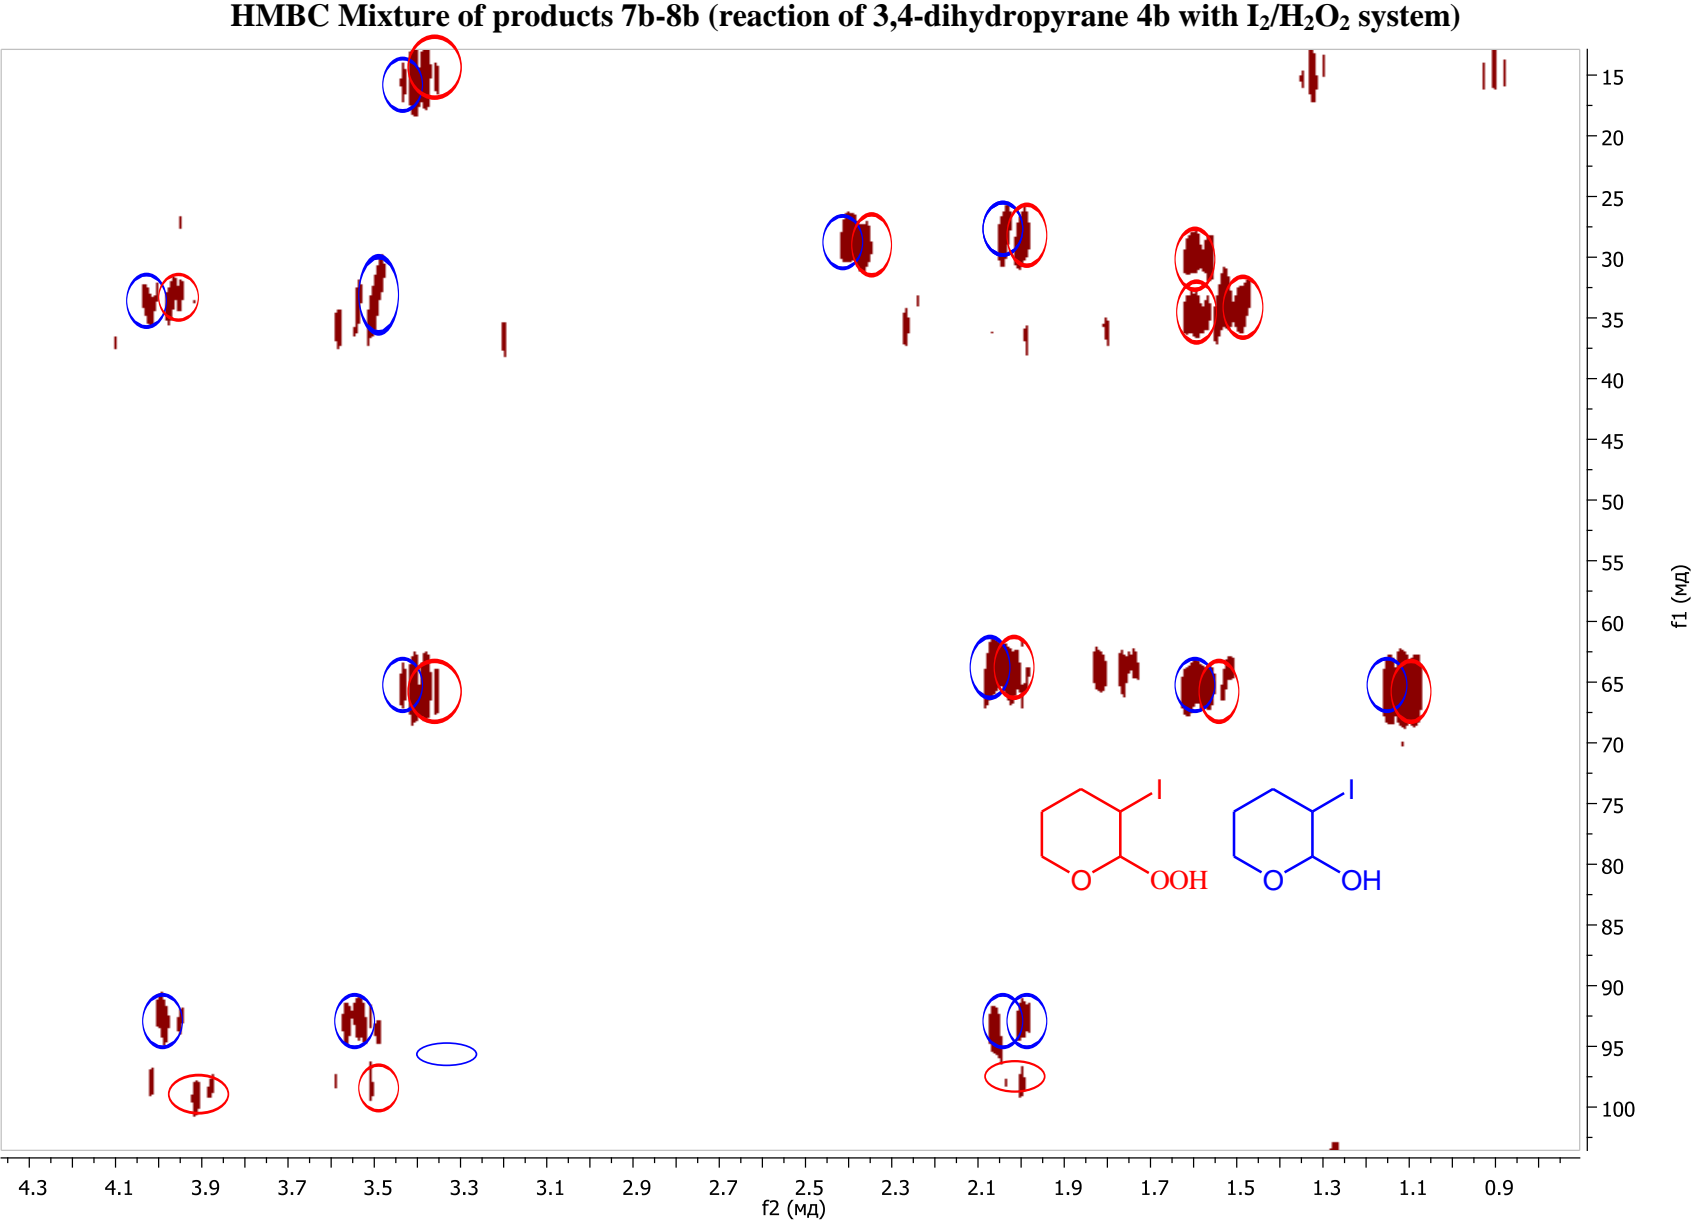

HSQC-TOCSY Mixture of products 7b-8b (reaction of 3,4-dihydropyran 4b with I<sub>2</sub>/H<sub>2</sub>O<sub>2</sub> system)

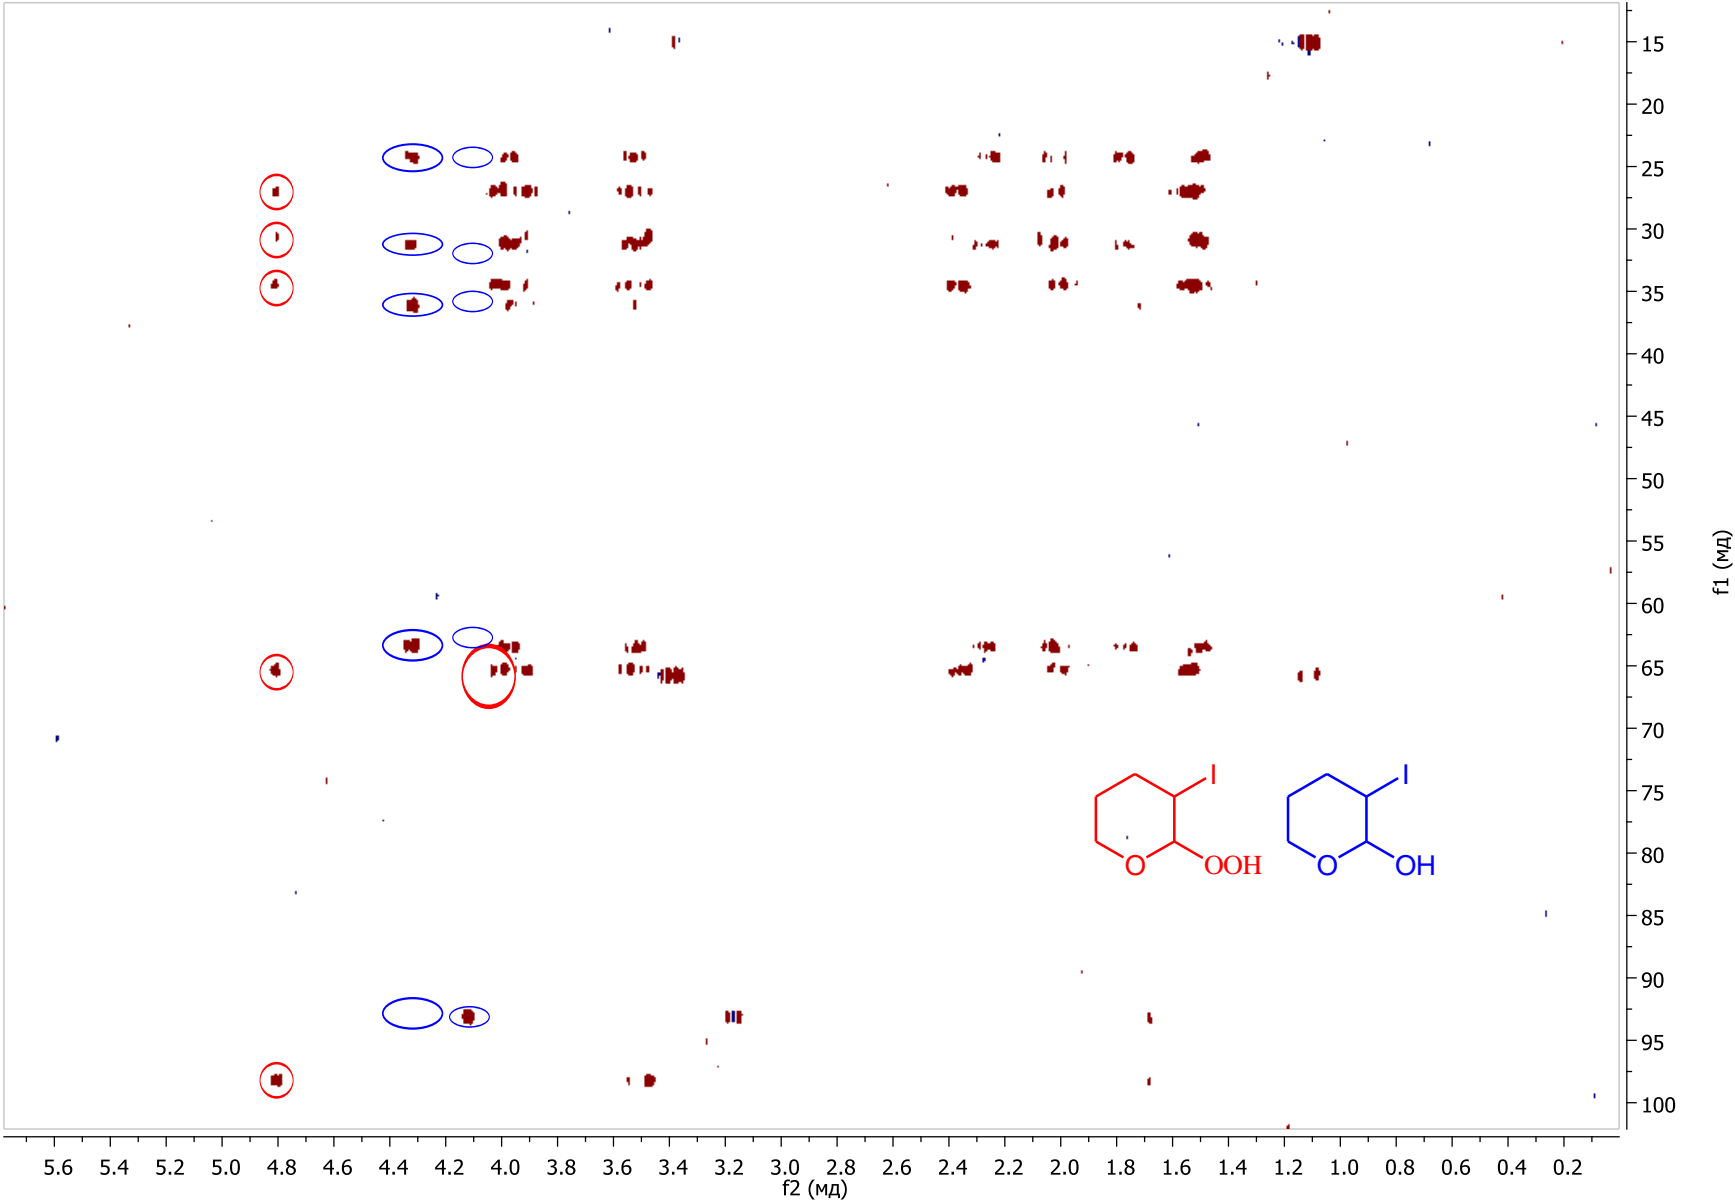

COSY Mixture of products 7b-8b (reaction of 3,4-dihydropyrane 4b with I<sub>2</sub>/H<sub>2</sub>O<sub>2</sub> system)

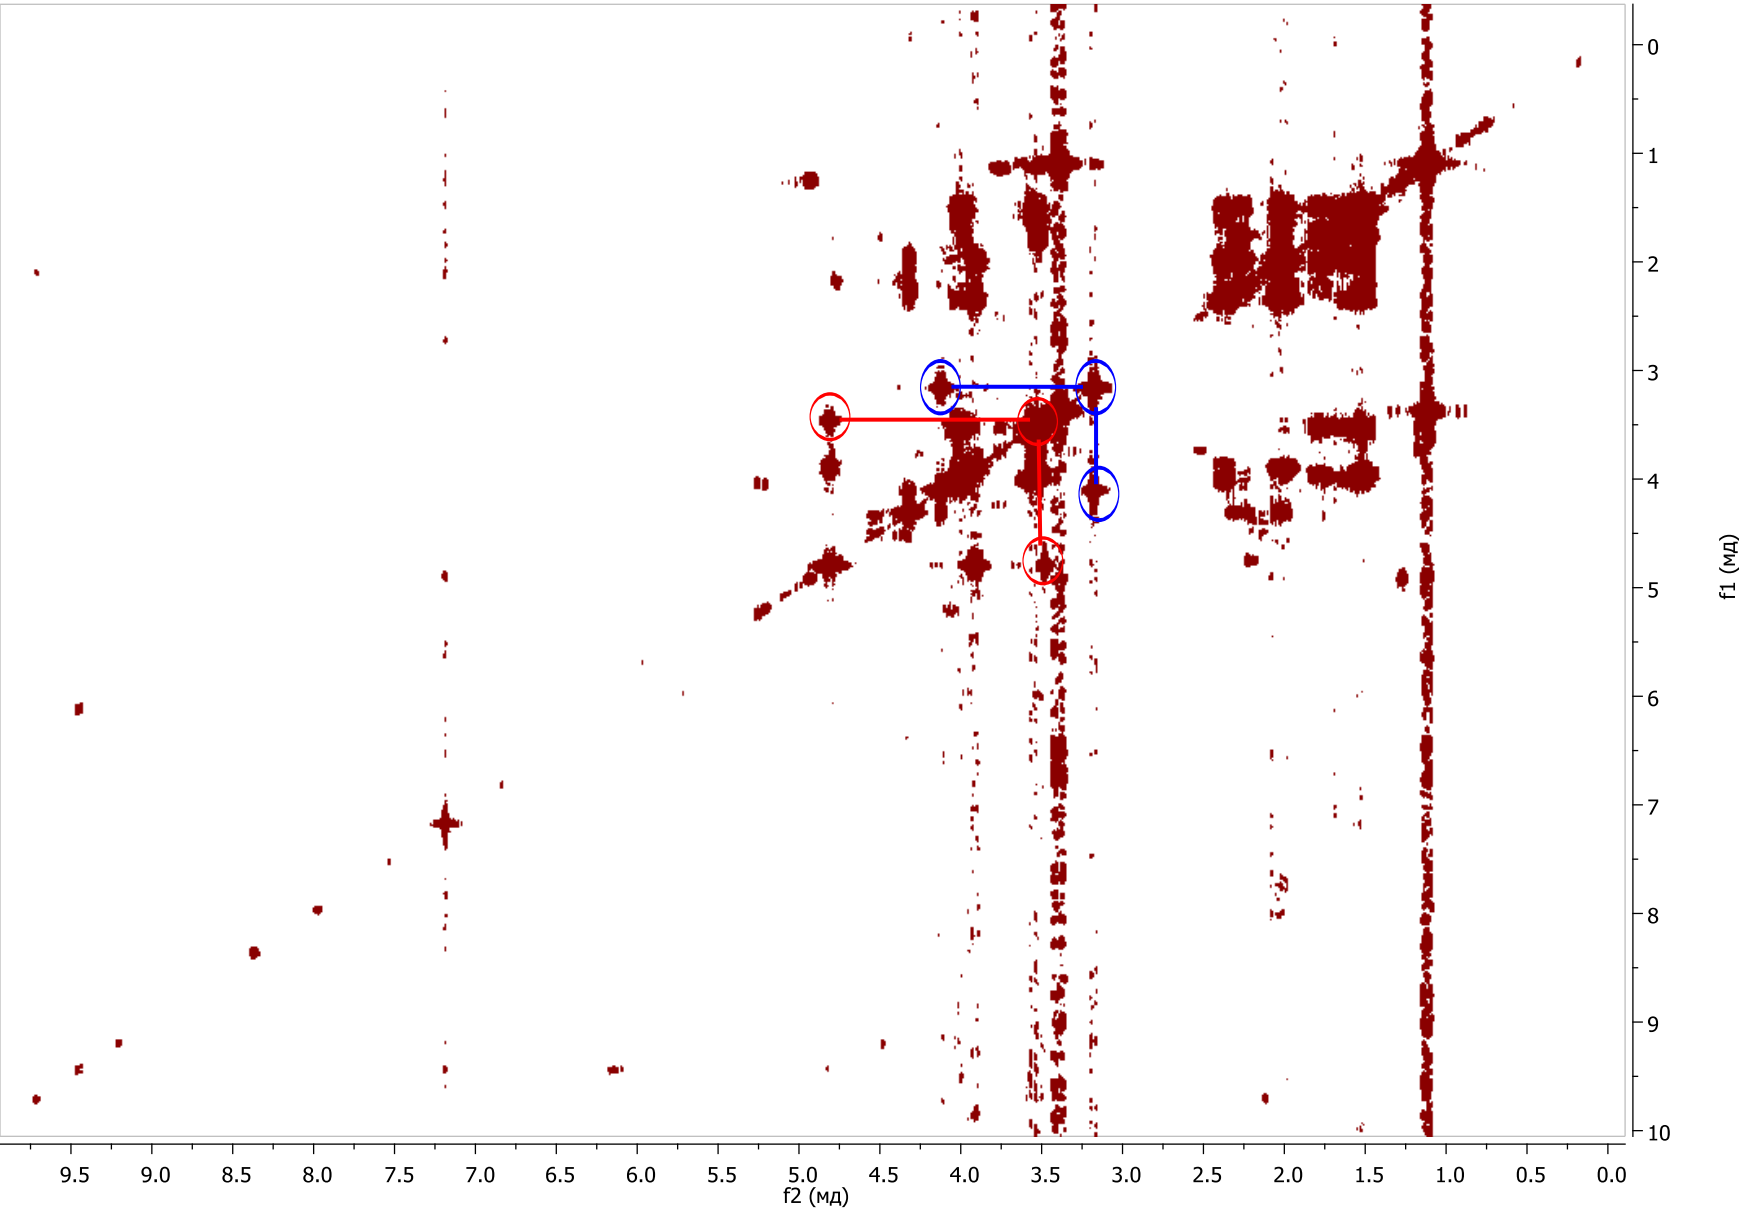



# <sup>1</sup>H NMR 2-(*tert*-Butylperoxy)-3-iodotetrahydrofuran (5a)

25 Sep 2013

|                               |        |                             |              |                               |                      |
|-------------------------------|--------|-----------------------------|--------------|-------------------------------|----------------------|
| <b>Acquisition Time (sec)</b> | 0.6759 | <b>Comment</b>              | AGOR NH0023  | <b>Date</b>                   | 25 Jul 2012 10:18:40 |
| <b>File Name</b>              |        |                             |              | <b>Frequency (MHz)</b>        | 300.13               |
| <b>Nucleus</b>                | 1H     | <b>Number of Transients</b> | 1            | <b>Original Points Count</b>  | 8124                 |
| <b>Pulse Sequence</b>         | zg     | <b>Solvent</b>              | CHLOROFORM-D | <b>Sweep Width (Hz)</b>       | 6009.62              |
|                               |        |                             |              | <b>Points Count</b>           | 8192                 |
|                               |        |                             |              | <b>Temperature (degree C)</b> | 27.500               |

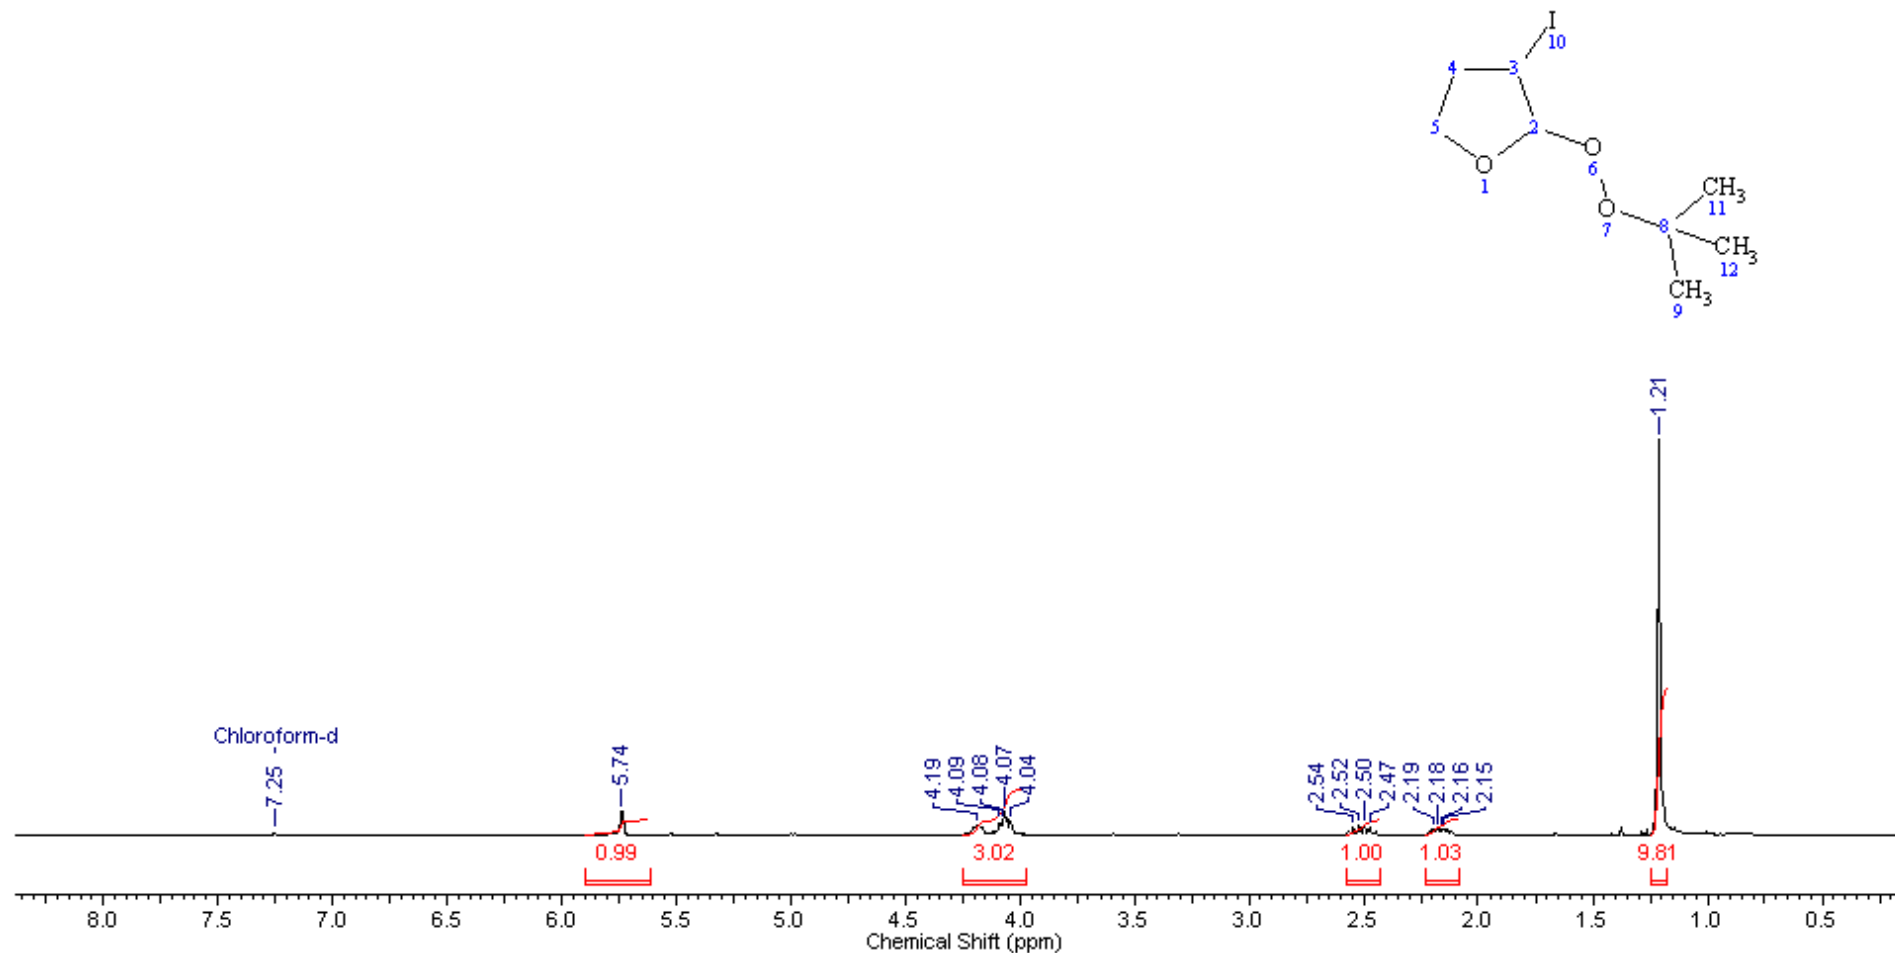

<sup>13</sup>C NMR 2-(*tert*-Butylperoxy)-3-iodotetrahydrofuran (5a)

2 Jul 2013

|                               |        |                       |                                     |                              |                      |
|-------------------------------|--------|-----------------------|-------------------------------------|------------------------------|----------------------|
| <b>Acquisition Time (sec)</b> | 0.4322 | <b>Comment</b>        | Avance-300, C-13, CDCl <sub>3</sub> | <b>Date</b>                  | 16 Aug 2012 09:48:48 |
| <b>Frequency (MHz)</b>        | 75.48  | <b>Nucleus</b>        | 13C                                 | <b>Number of Transients</b>  | 99                   |
| <b>Points Count</b>           | 16384  | <b>Pulse Sequence</b> | zgpg60base                          | <b>Solvent</b>               | CHLOROFORM-D         |
| <b>Temperature (degree C)</b> | 28.400 |                       |                                     | <b>Original Points Count</b> | 16308                |
|                               |        |                       |                                     | <b>Sweep Width (Hz)</b>      | 18867.92             |

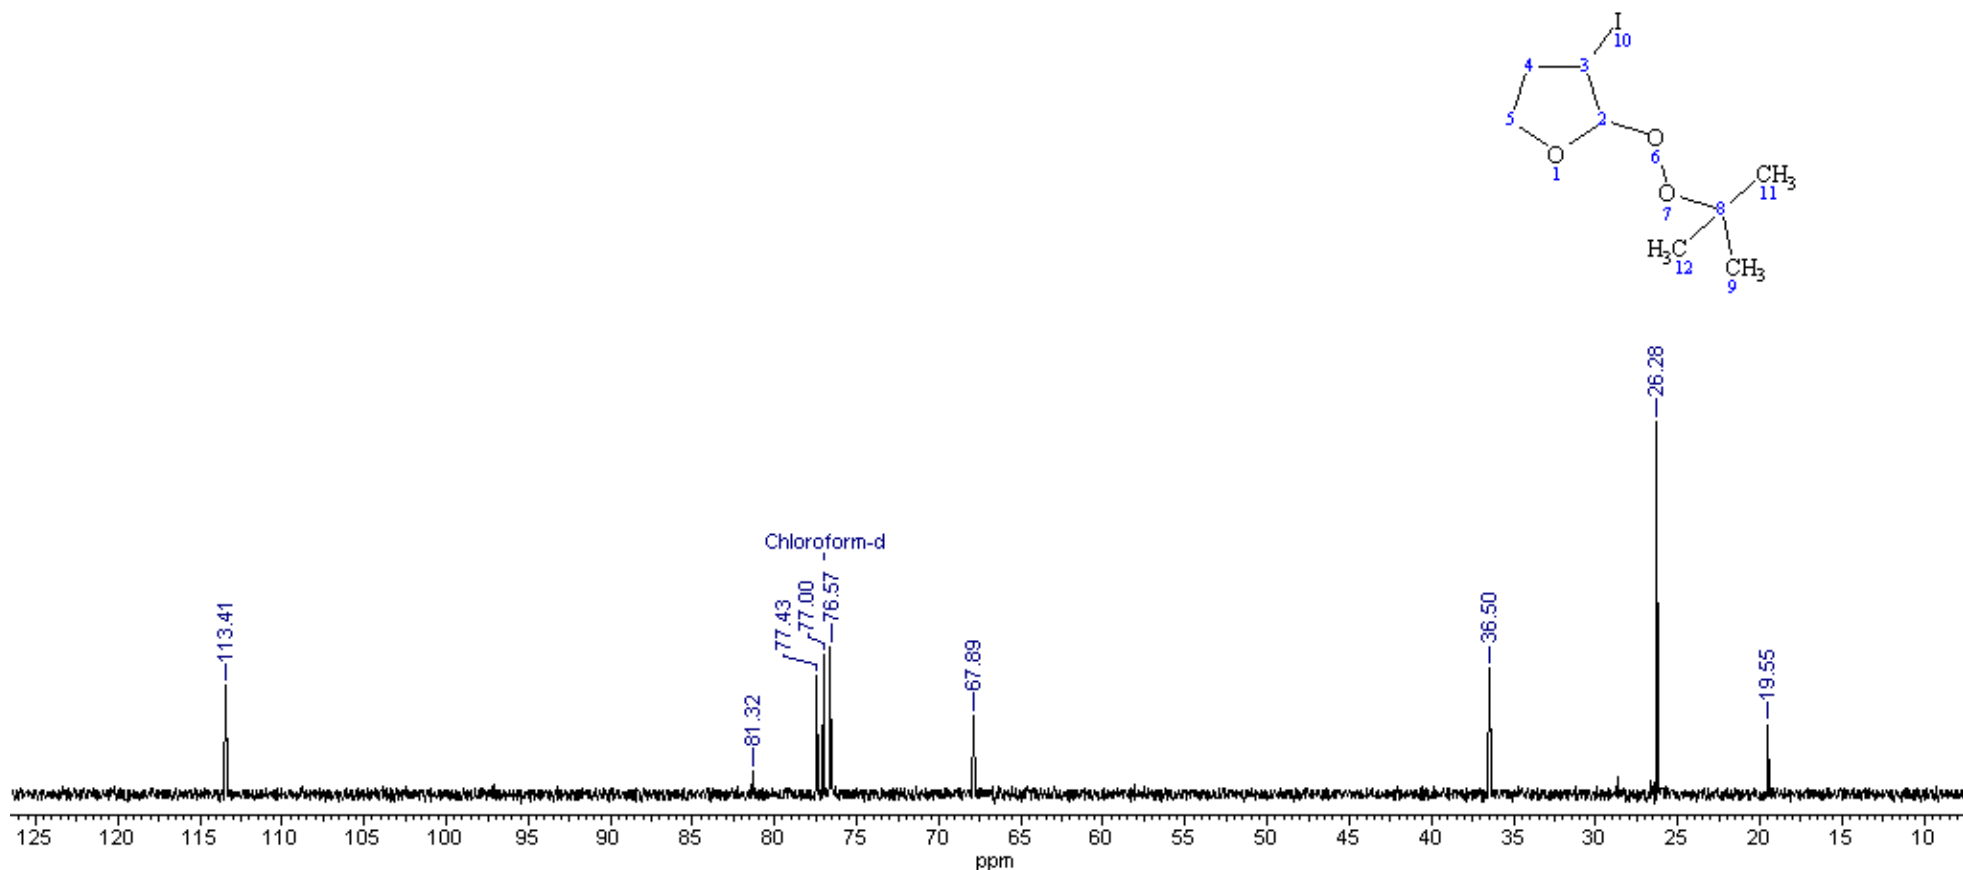

# HRMS 2-(*tert*-Butylperoxy)-3-iodotetrahydrofuran (5a)

## Display Report

### Analysis Info

Analysis Name D:\Data\Ivanova\ZD4.d  
Method tune\_low.m  
Sample Name /TERN ZD4  
Comment MeOH no clb added

Acquisition Date 8/13/2012 5:05:38 PM  
Operator BDAL@DE  
Instrument / Ser# micrOTOF 10248

### Acquisition Parameter

|             |            |                      |          |                  |           |
|-------------|------------|----------------------|----------|------------------|-----------|
| Source Type | ESI        | Ion Polarity         | Positive | Set Nebulizer    | 0.4 Bar   |
| Focus       | Not active |                      |          | Set Dry Heater   | 180 °C    |
| Scan Begin  | 50 m/z     | Set Capillary        | 4500 V   | Set Dry Gas      | 4.0 l/min |
| Scan End    | 3000 m/z   | Set End Plate Offset | -500 V   | Set Divert Valve | Waste     |

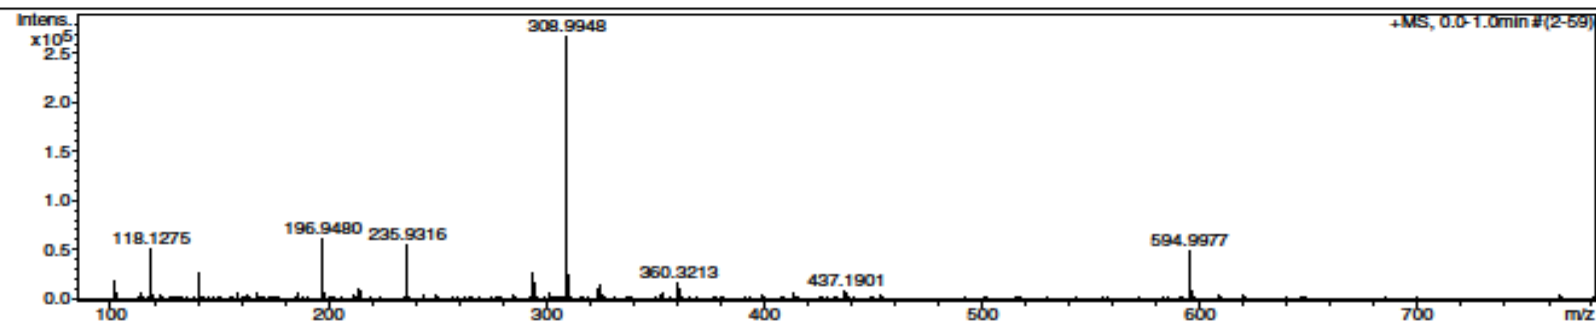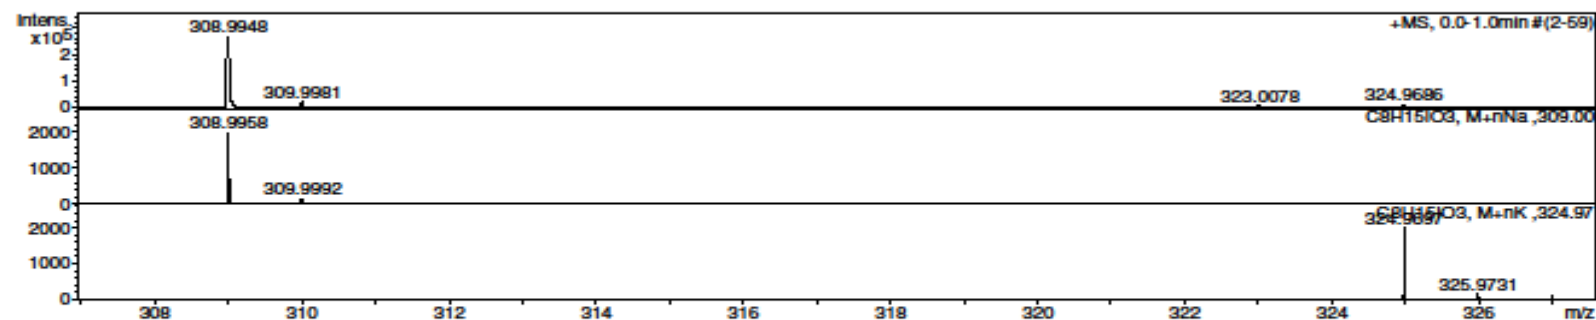

IR 2-(*tert*-Butylperoxy)-3-iodotetrahydrofuran (5a)

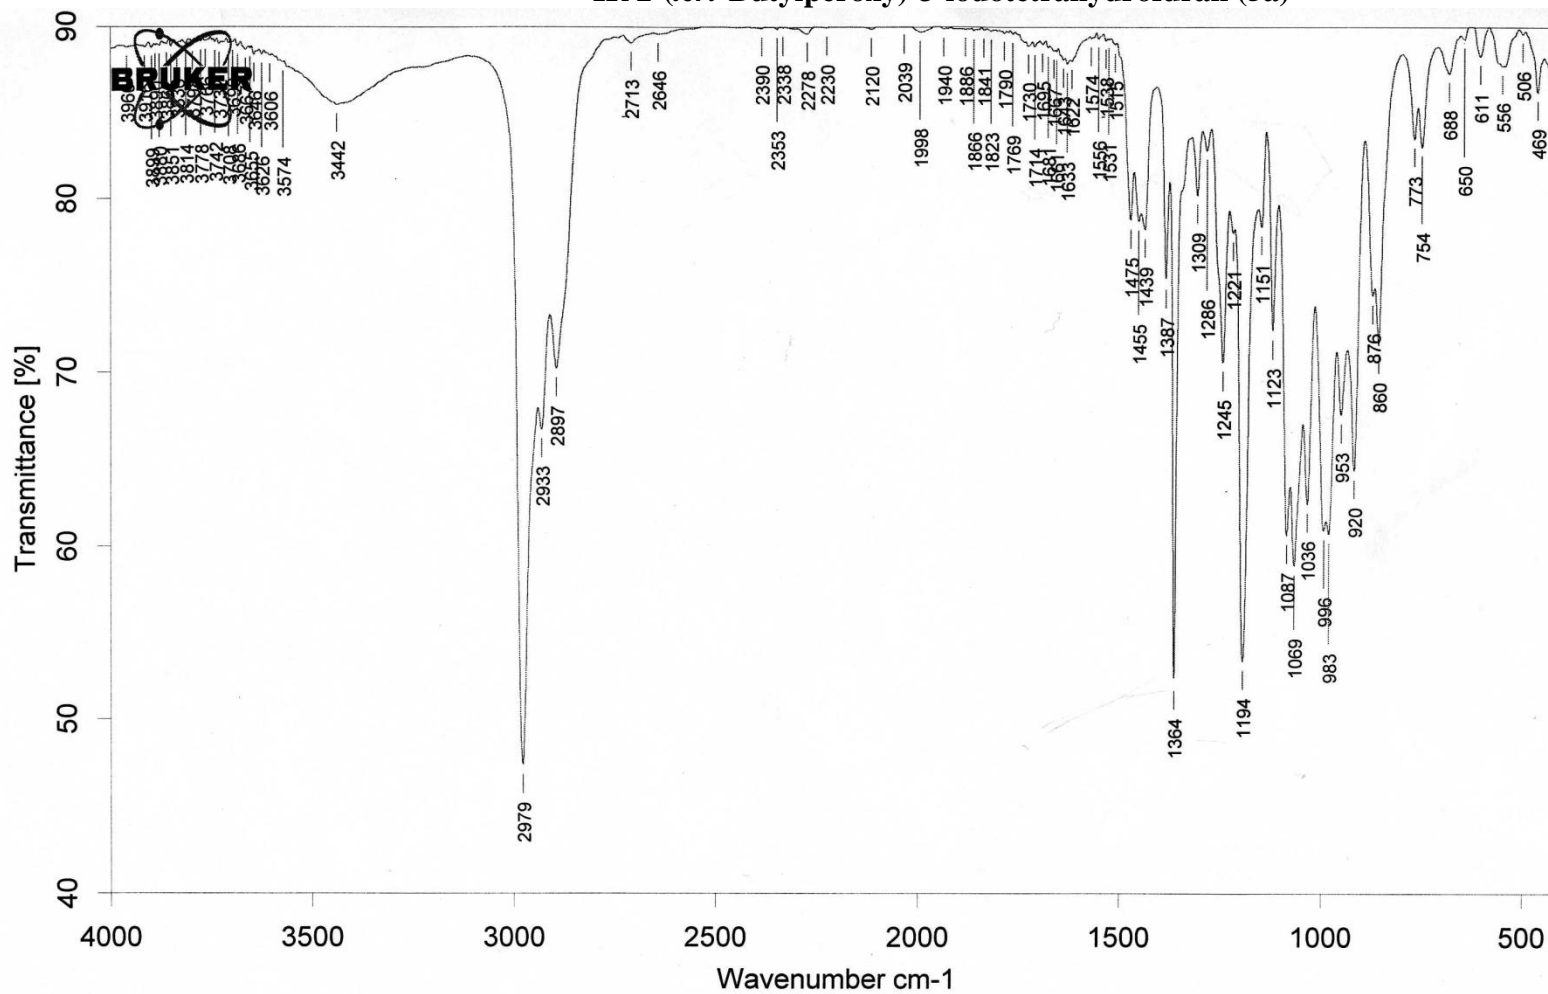

C:\Data\EDL\ZD-117.0 ZDVIZHKOV. ZD-117, thin layer on KBr.

17/10/2012

<sup>1</sup>H NMR 2-(*tert*-Butylperoxy)-3-iodotetrahydro-2*H*-pyran (5b)

24 Sep 2013

|                               |              |                               |                      |
|-------------------------------|--------------|-------------------------------|----------------------|
| <b>Acquisition Time (sec)</b> | 1.3518       | <b>Date</b>                   | 24 Jul 2012 10:50:40 |
| <b>File Name</b>              |              |                               |                      |
| <b>Frequency (MHz)</b>        | 300.13       | <b>Nucleus</b>                | 1H                   |
| <b>Original Points Count</b>  | 8124         | <b>Points Count</b>           | 8192                 |
| <b>Solvent</b>                | CHLOROFORM-D | <b>Sweep Width (Hz)</b>       | 6009.62              |
|                               |              | <b>Number of Transients</b>   | 1                    |
|                               |              | <b>Pulse Sequence</b>         | zg                   |
|                               |              | <b>Temperature (degree C)</b> | 27.700               |

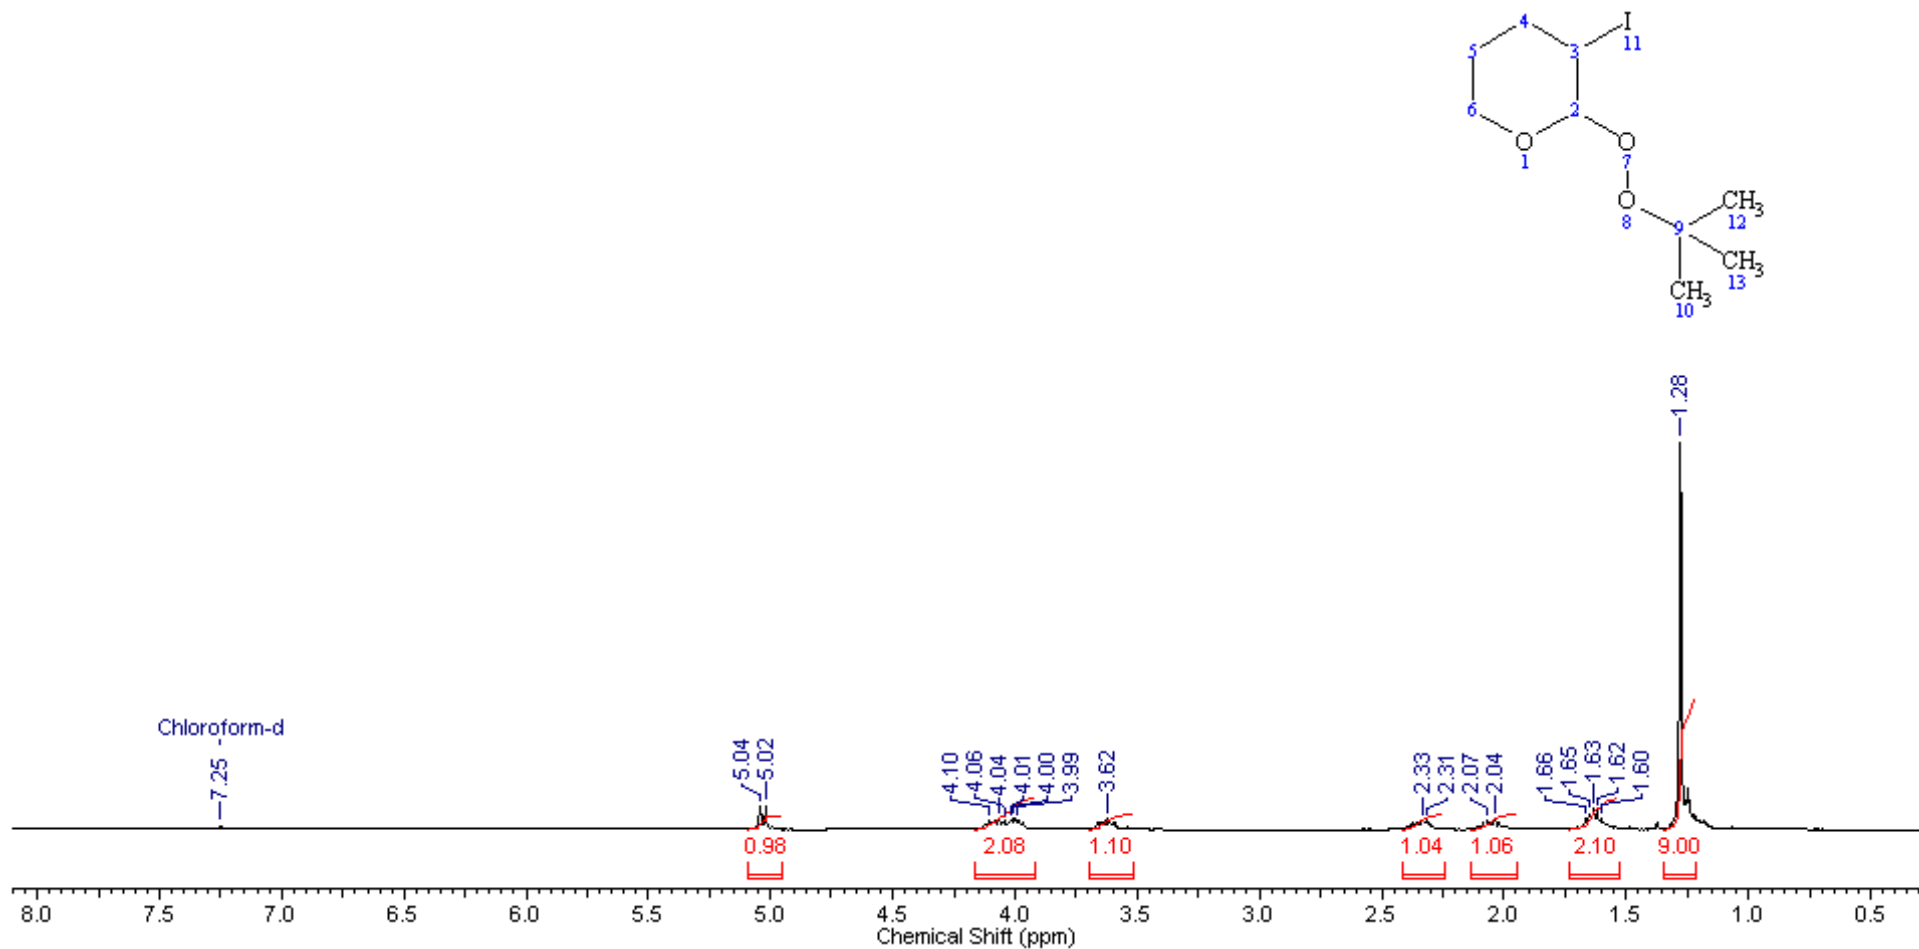

<sup>13</sup>C NMR 2-(*tert*-Butylperoxy)-3-iodotetrahydro-2*H*-pyran (5b)

|                               |              |                         |                         |                               |                      |
|-------------------------------|--------------|-------------------------|-------------------------|-------------------------------|----------------------|
| <b>Acquisition Time (sec)</b> | 0.4501       | <b>Comment</b>          | Avance-300, C-13, CDCl3 | <b>Date</b>                   | 05 May 2008 12:37:20 |
| <b>File Name</b>              |              |                         |                         |                               |                      |
| <b>Frequency (MHz)</b>        | 75.48        | <b>Nucleus</b>          | 13C                     | <b>Number of Transients</b>   | 2444                 |
| <b>Original Points Count</b>  | 16308        | <b>Points Count</b>     | 16384                   | <b>Pulse Sequence</b>         | zgpg30base           |
| <b>Solvent</b>                | CHLOROFORM-D | <b>Sweep Width (Hz)</b> | 18115.94                | <b>Temperature (degree C)</b> | 24.100               |

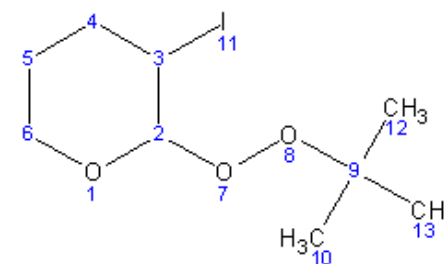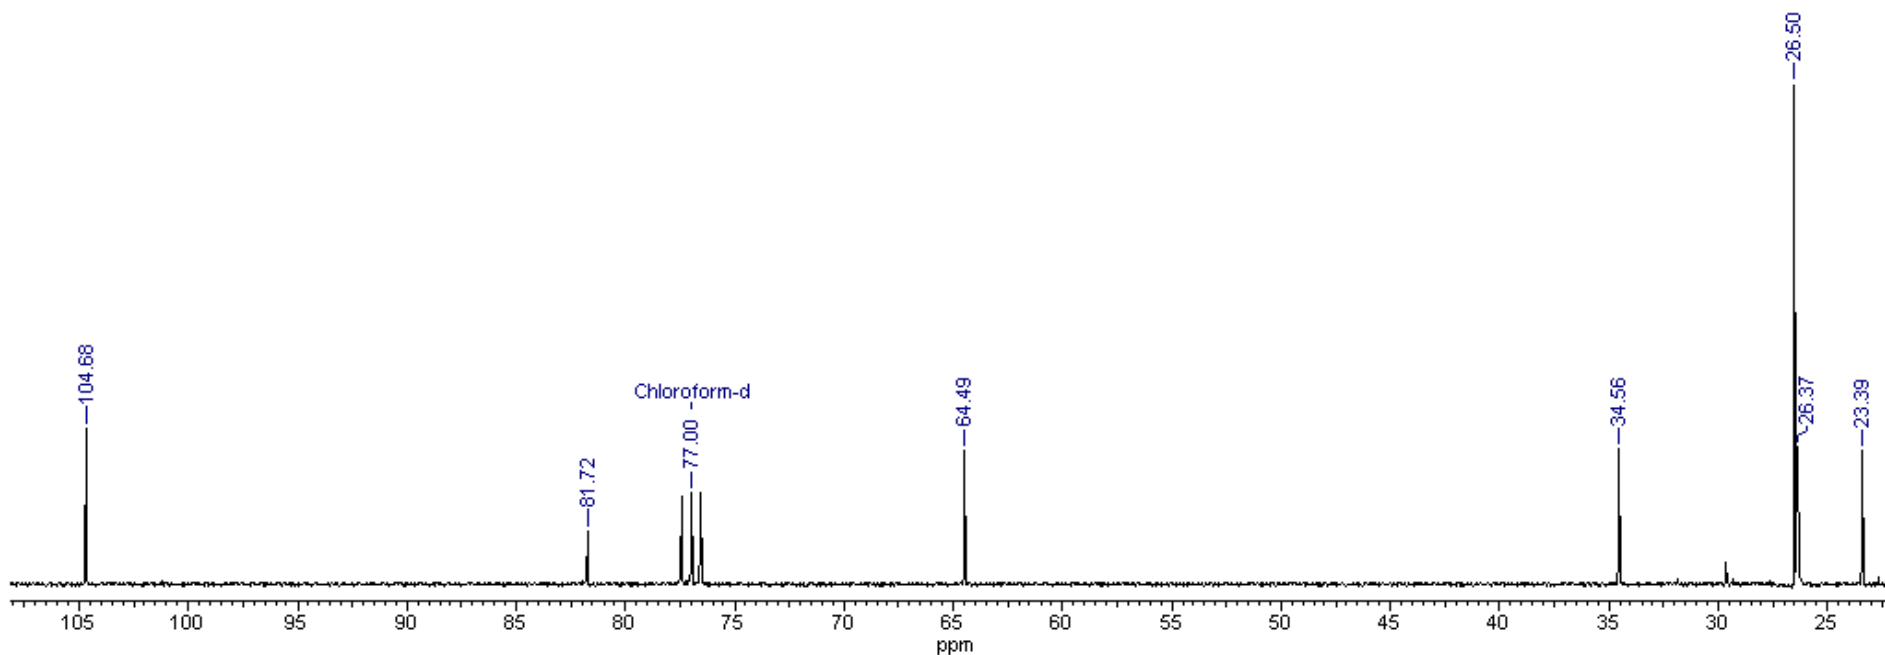

# HRMS 2-(*tert*-Butylperoxy)-3-iodotetrahydro-2*H*-pyran (5b)

## Display Report

### Analysis Info

Analysis Name D:\Data\Ivanova\ZD12.d  
Method tune\_low.m  
Sample Name /TERN ZD12  
Comment MeOH no clb added

Acquisition Date 8/13/2012 4:51:02 PM  
Operator BDAL@DE  
Instrument / Ser# micrOTOF 10248

### Acquisition Parameter

|             |            |                      |          |                  |           |
|-------------|------------|----------------------|----------|------------------|-----------|
| Source Type | ESI        | Ion Polarity         | Positive | Set Nebulizer    | 0.4 Bar   |
| Focus       | Not active |                      |          | Set Dry Heater   | 180 °C    |
| Scan Begin  | 50 m/z     | Set Capillary        | 4500 V   | Set Dry Gas      | 4.0 l/min |
| Scan End    | 3000 m/z   | Set End Plate Offset | -500 V   | Set Divert Valve | Waste     |

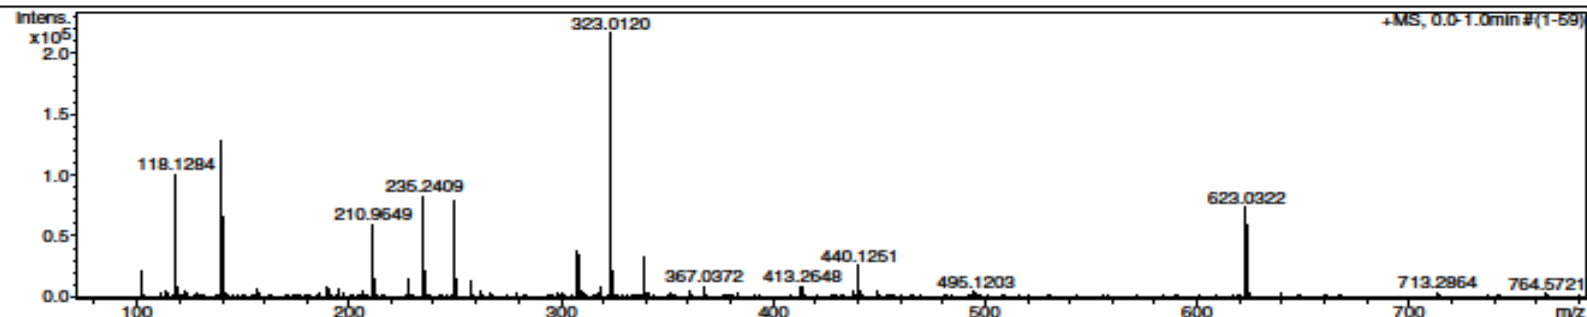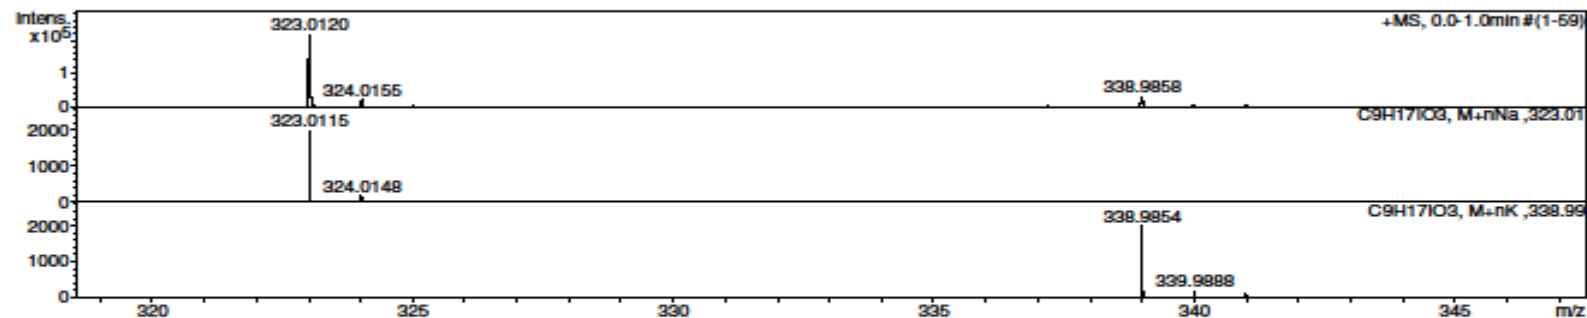

IR 2-(*tert*-Butylperoxy)-3-iodotetrahydro-2*H*-pyran (5b)

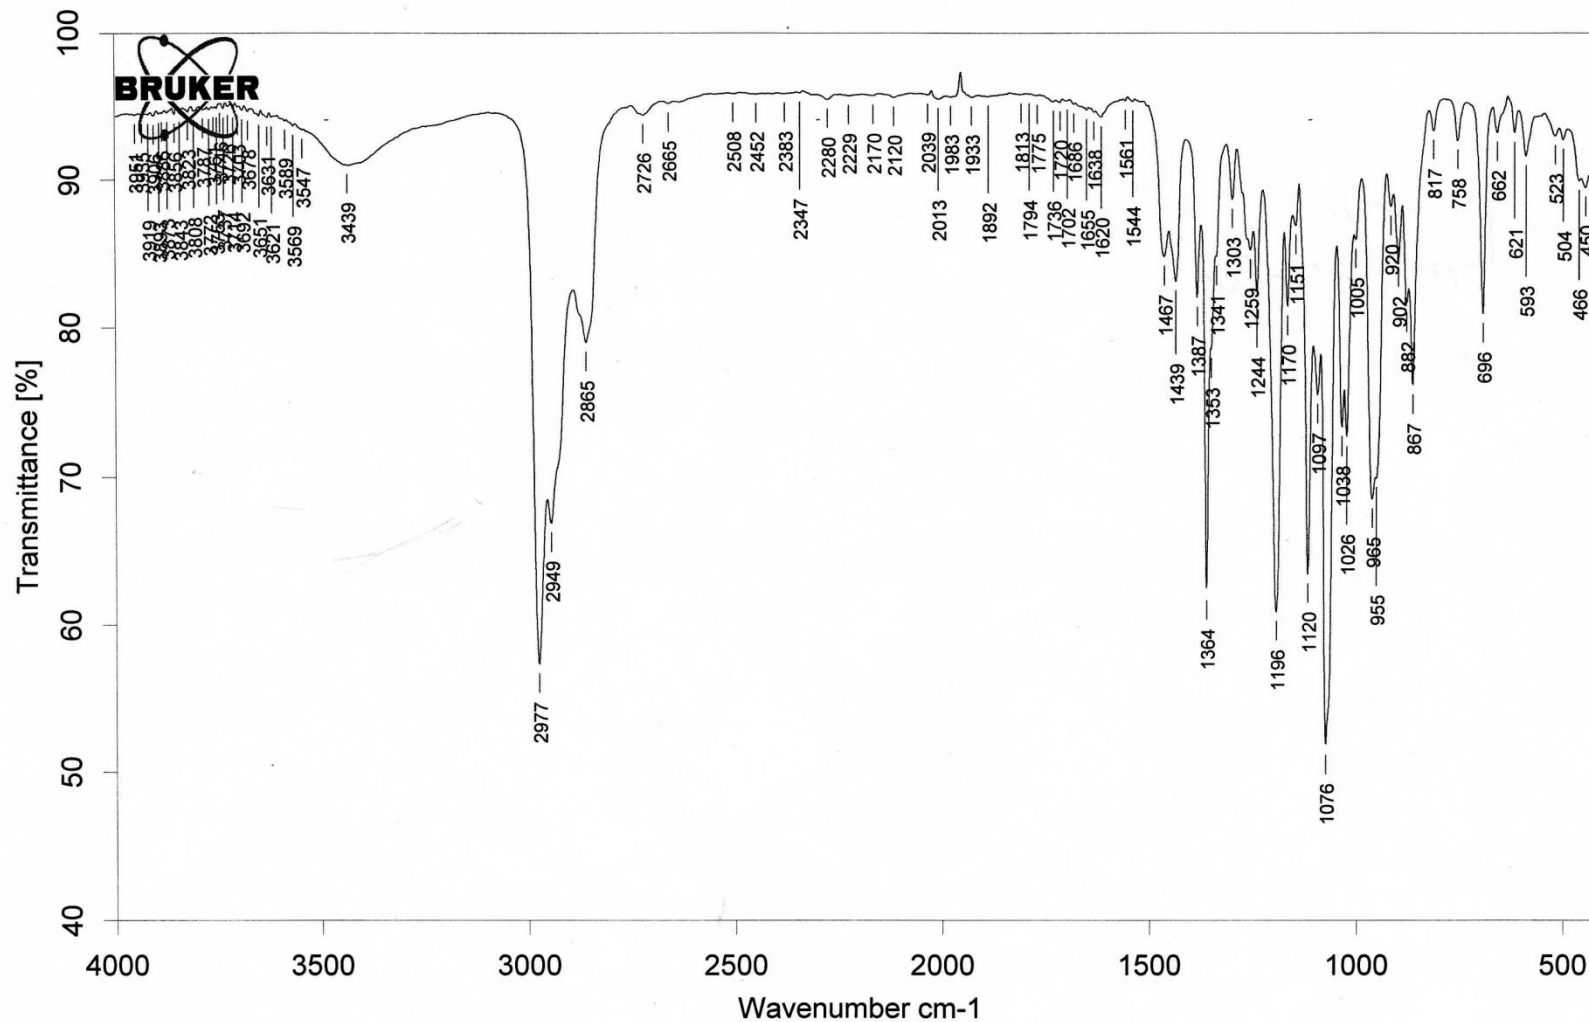

C:\Data\EDL\ZD-119.0 ZDVIZHKOV. ZD-119, thin layer on KBr.

17/10/2012



<sup>1</sup>H NMR 2-[(3-Iodotetrahydrofuran-2-yl)peroxy]tetrahydro-2H-pyran (6a)

25 Sep 2013

|                        |                      |                  |                      |                               |
|------------------------|----------------------|------------------|----------------------|-------------------------------|
| Acquisition Time (sec) | 1.3518               | Comment          | Avance-300, 1H CDCl3 |                               |
| Date                   | 10 Nov 2012 09:12:32 |                  |                      |                               |
| File Name              |                      |                  |                      |                               |
| Frequency (MHz)        | 300.13               | Nucleus          | 1H                   | Number of Transients 1        |
| Original Points Count  | 8124                 | Points Count     | 8192                 | Pulse Sequence zgpg30         |
| Solvent                | CHLOROFORM-D         | Sweep Width (Hz) | 6009.62              | Temperature (degree C) 27.000 |

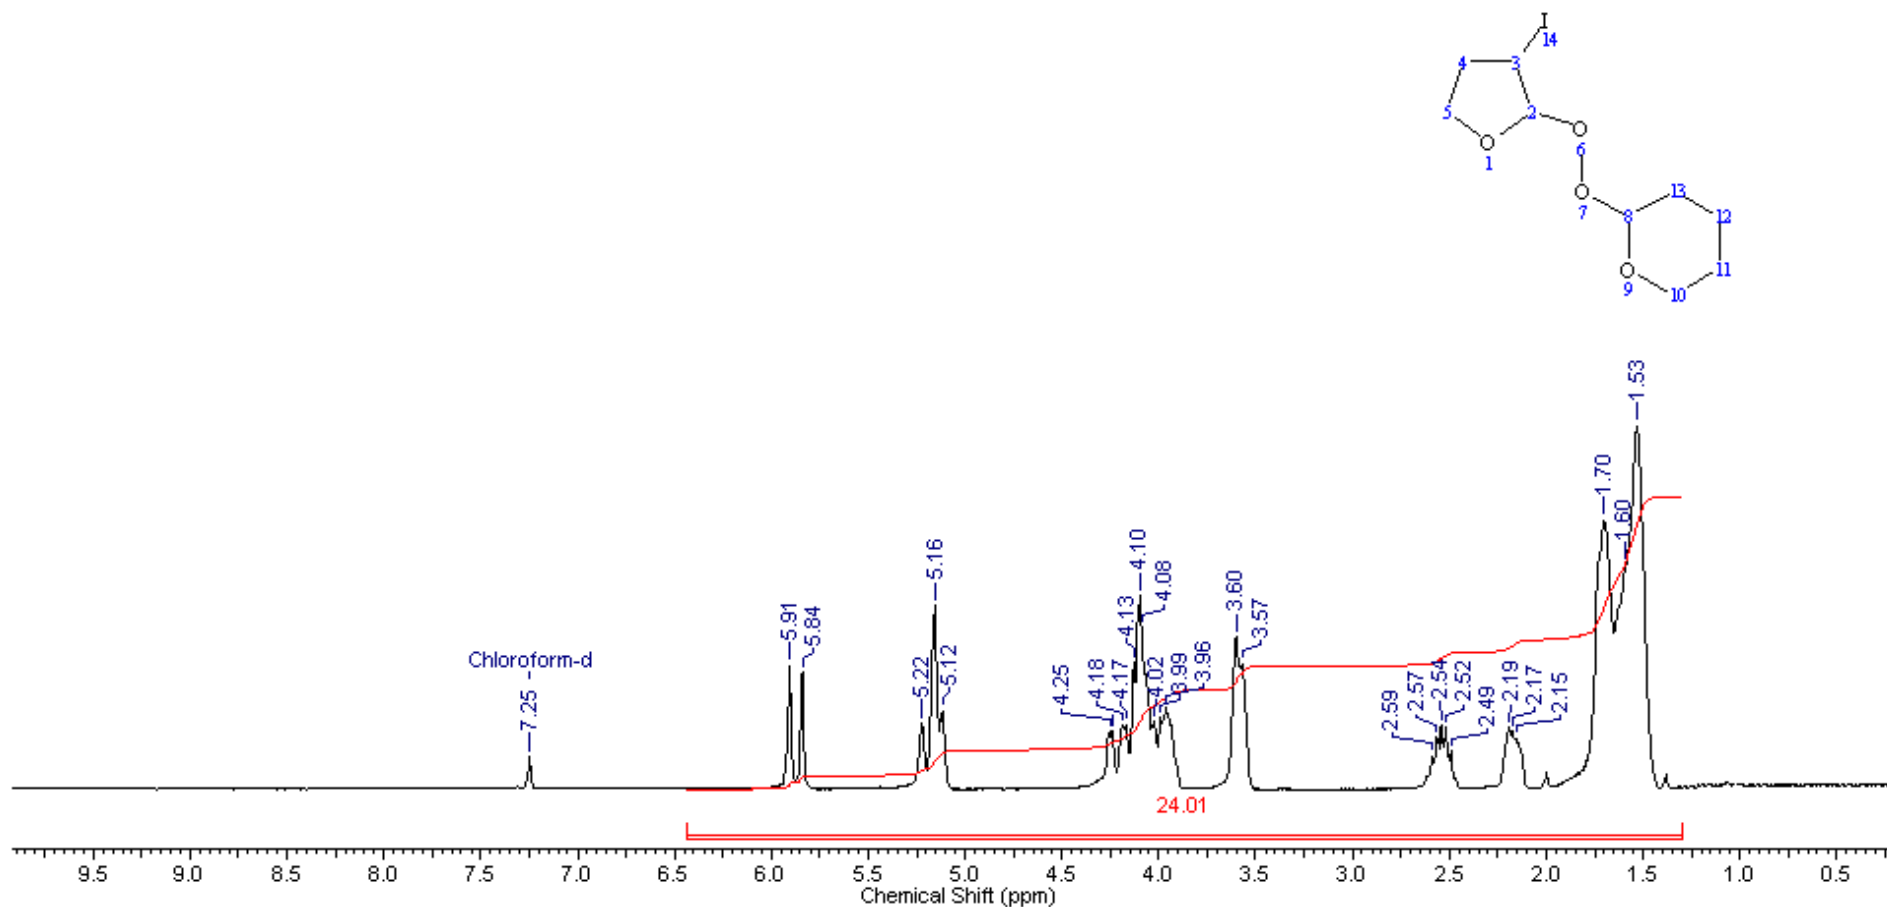

<sup>13</sup>C NMR 2-[(3-Iodotetrahydrofuran-2-yl)peroxy]tetrahydro-2H-pyran (6a)

2 Jul 2013

|                        |        |                |              |                       |                      |
|------------------------|--------|----------------|--------------|-----------------------|----------------------|
| Acquisition Time (sec) | 0.4322 | Comment        | NMR/50075242 | Date                  | 10 Nov 2012 09:18:56 |
| File Name              |        |                |              |                       |                      |
| Frequency (MHz)        | 75.48  | Nucleus        | 13C          | Number of Transients  | 261                  |
| Points Count           | 16384  | Pulse Sequence | zgpg60base   | Solvent               | CHLOROFORM-D         |
| Temperature (degree C) | 27.800 |                |              | Original Points Count | 16308                |
|                        |        |                |              | Sweep Width (Hz)      | 18867.92             |

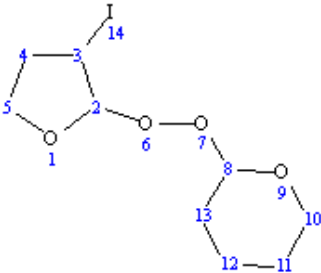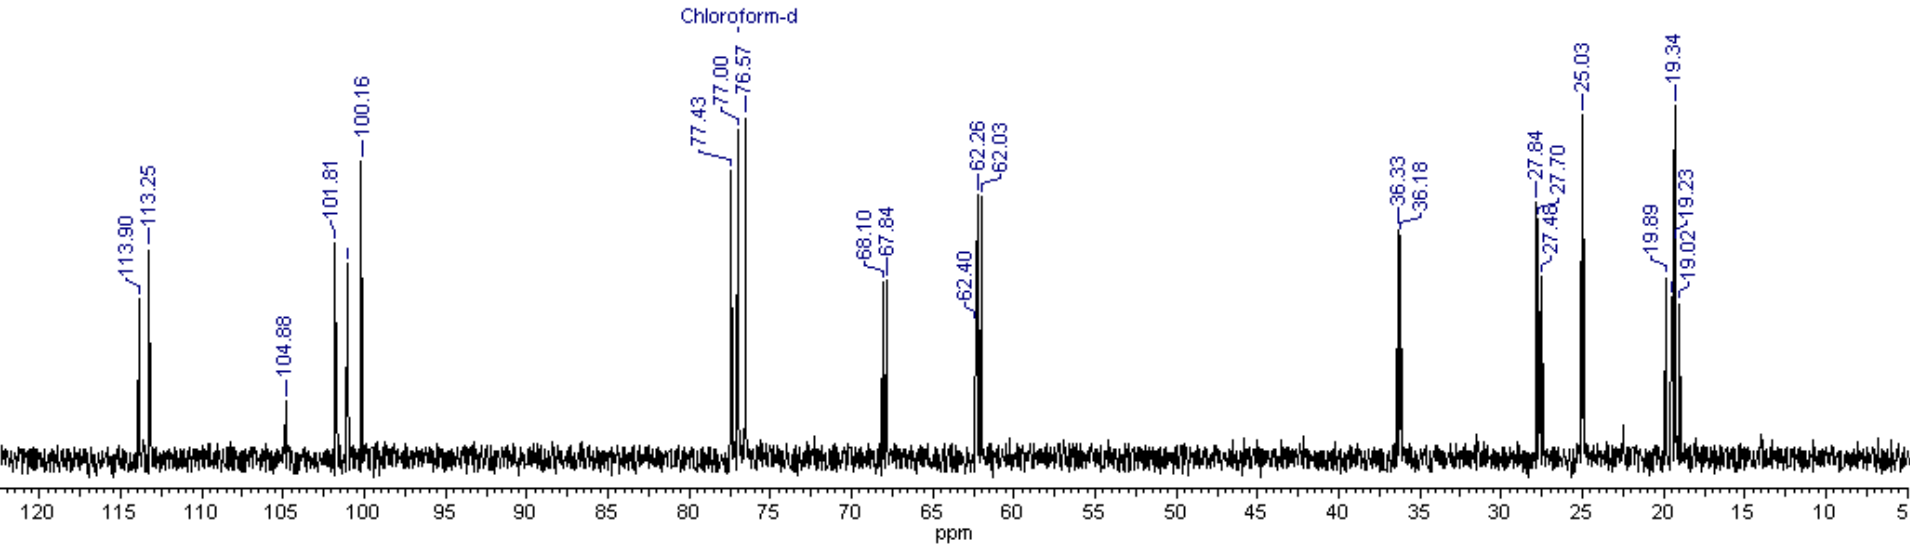

| No. | Annotation   | (ppm) |
|-----|--------------|-------|
| 1   | Chloroform-d | 77.00 |

# HRMS 2-[(3-Iodotetrahydrofuran-2-yl)peroxy]tetrahydro-2H-pyran (6a)

## Display Report

### Analysis Info

Analysis Name D:\Data\khemchyan\daily\MeCN&zd-120.d  
Method tune\_wide.m  
Sample Name MeCN&zd-120  
Comment Sample name: zd-120  
Sample owner: Zdvigkov  
Solvent: MeCN  
Conc.: approx. 0.18 ng/ml

Acquisition Date 11/23/2012 12:01:50 PM

Operator BDAL@DE  
Instrument / Ser# maXis 43

### Acquisition Parameter

|             |          |                      |          |                  |           |
|-------------|----------|----------------------|----------|------------------|-----------|
| Source Type | ESI      | Ion Polarity         | Positive | Set Nebulizer    | 0.4 Bar   |
| Focus       | Active   |                      |          | Set Dry Heater   | 180 °C    |
| Scan Begin  | 50 m/z   | Set Capillary        | 4500 V   | Set Dry Gas      | 4.0 l/min |
| Scan End    | 3000 m/z | Set End Plate Offset | -500 V   | Set Divert Valve | Waste     |

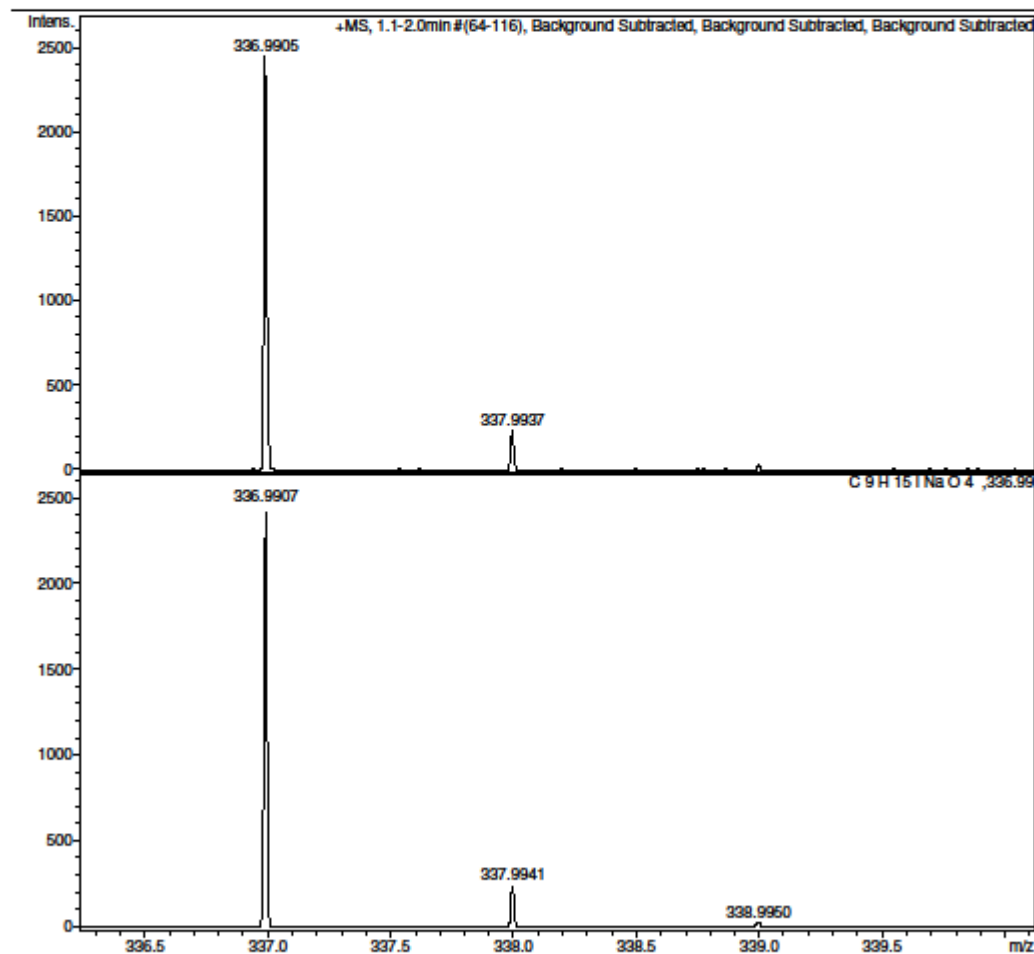

IR 2-[(3-Iodotetrahydrofuran-2-yl)peroxy]tetrahydro-2H-pyran (6a)

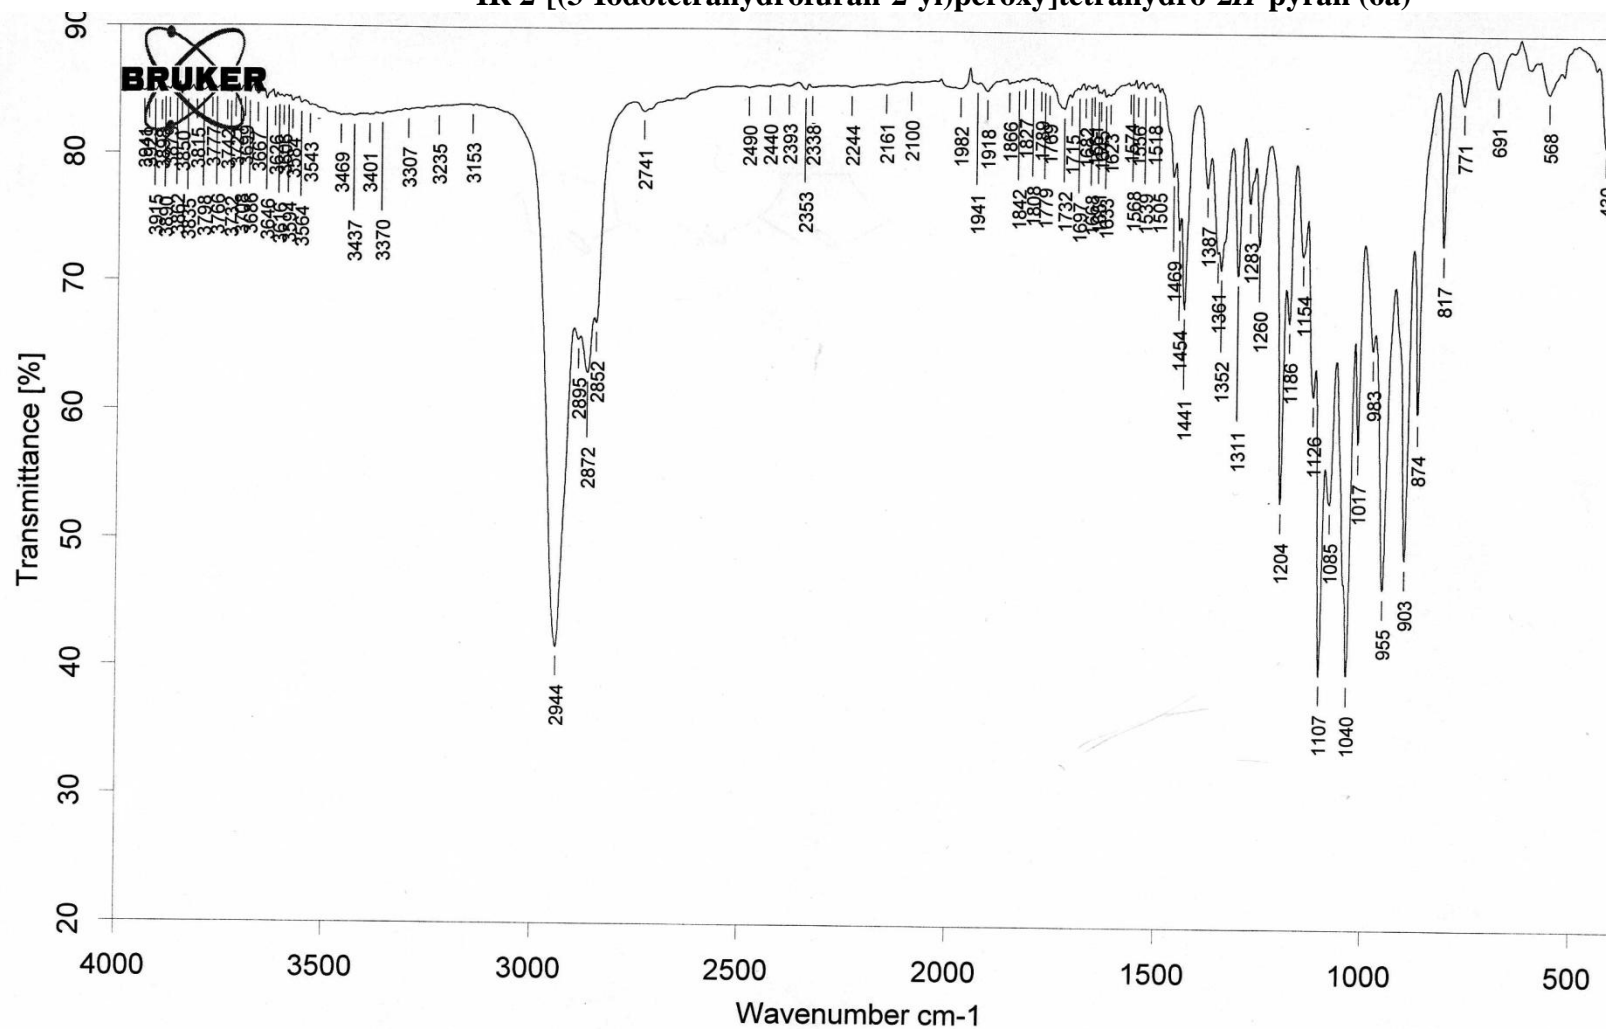

C:\Data\EDL\ZD-120.0 ZDVIZHKOV. ZD-120, thin layer on KBr.

11/12/2012

<sup>1</sup>H NMR 3-Iodo-2-(tetrahydro-2H-pyran-2-ylperoxy)tetrahydro-2H-pyran (6b)

4 Jan 2014

|                               |        |                       |                      |                              |                      |
|-------------------------------|--------|-----------------------|----------------------|------------------------------|----------------------|
| <b>Acquisition Time (sec)</b> | 1.3518 | <b>Comment</b>        | Avance-300, 1H CDCl3 | <b>Date</b>                  | 12 Nov 2012 07:23:44 |
| <b>File Name</b>              |        |                       |                      |                              |                      |
| <b>Frequency (MHz)</b>        | 300.13 | <b>Nucleus</b>        | 1H                   | <b>Number of Transients</b>  | 1                    |
| <b>Points Count</b>           | 8192   | <b>Pulse Sequence</b> | zg                   | <b>Solvent</b>               | CHLOROFORM-D         |
| <b>Temperature (degree C)</b> | 27.200 |                       |                      | <b>Original Points Count</b> | 8124                 |
|                               |        |                       |                      | <b>Sweep Width (Hz)</b>      | 6009.62              |

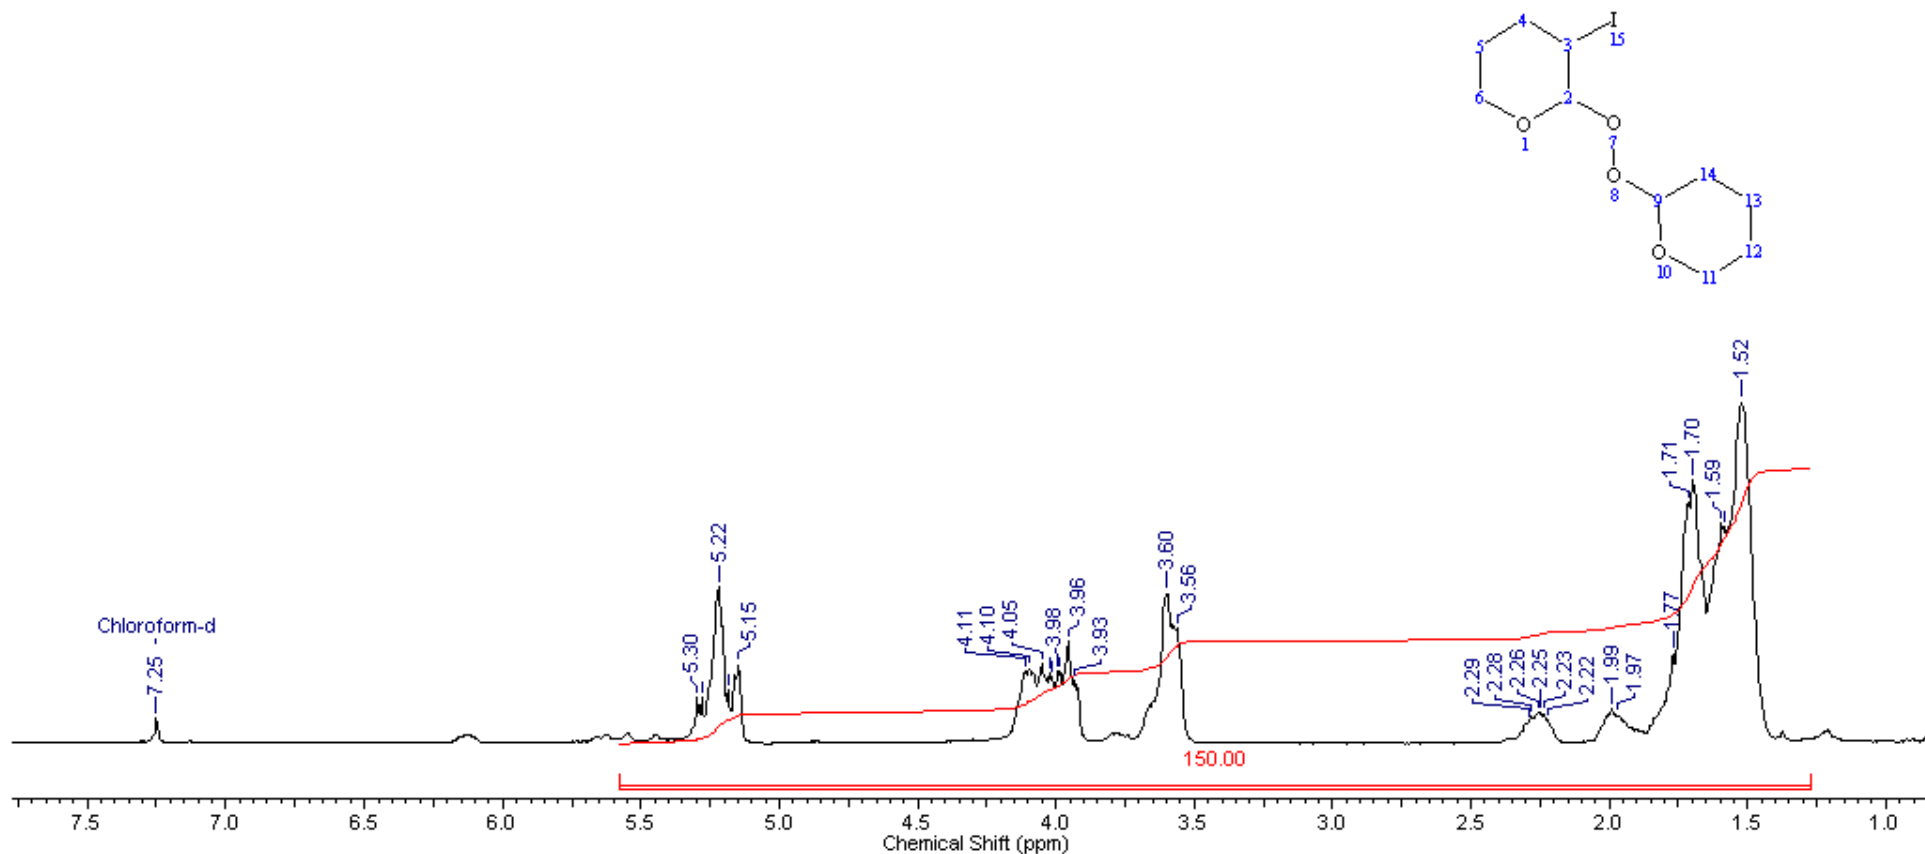

<sup>13</sup>C NMR 3-Iodo-2-(tetrahydro-2*H*-pyran-2-ylperoxy)tetrahydro-2*H*-pyran (6b)

4 Jan 2014

|                               |              |                         |                                     |                               |                      |
|-------------------------------|--------------|-------------------------|-------------------------------------|-------------------------------|----------------------|
| <b>Acquisition Time (sec)</b> | 0.9002       | <b>Comment</b>          | Avance-300, C-13, CDCl <sub>3</sub> | <b>Date</b>                   | 12 Nov 2012 16:27:44 |
| <b>File Name</b>              |              |                         |                                     |                               |                      |
| <b>Frequency (MHz)</b>        | 75.48        | <b>Nucleus</b>          | 13C                                 | <b>Number of Transients</b>   | 321                  |
| <b>Original Points Count</b>  | 16308        | <b>Points Count</b>     | 16384                               | <b>Pulse Sequence</b>         | zgpg30base           |
| <b>Solvent</b>                | CHLOROFORM-D | <b>Sweep Width (Hz)</b> | 18115.94                            | <b>Temperature (degree C)</b> | 28.000               |

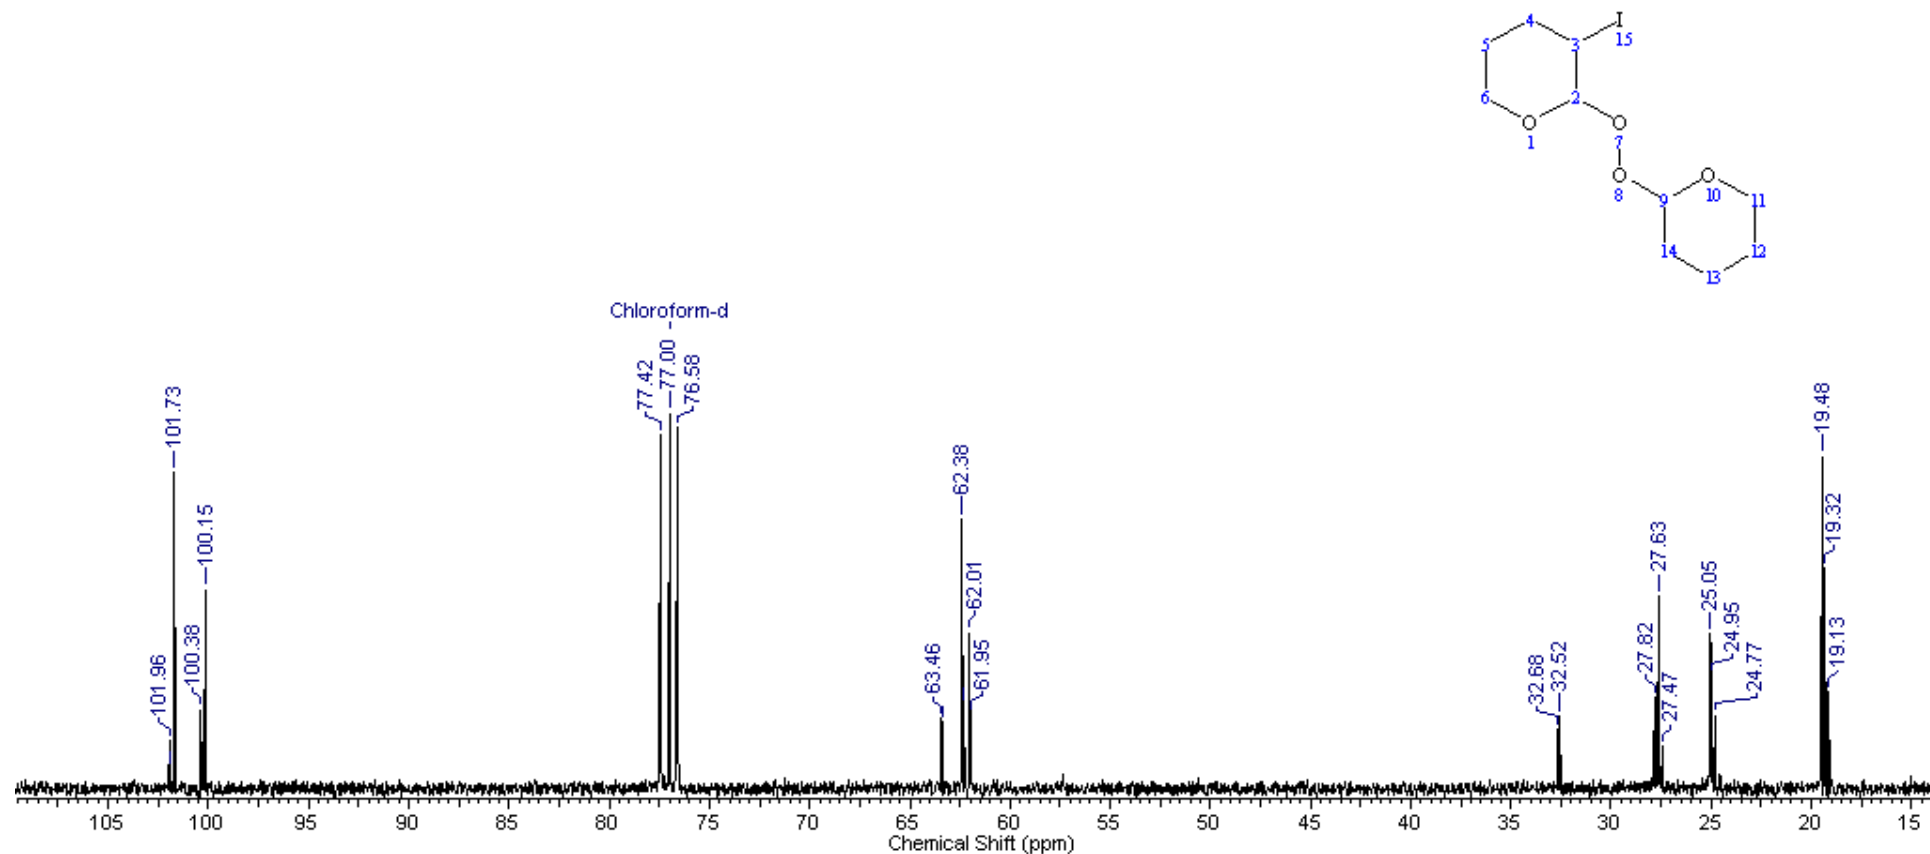

# HRMS 3-Iodo-2-(tetrahydro-2H-pyran-2-ylperoxy)tetrahydro-2H-pyran (6b)

## Display Report

### Analysis Info

Analysis Name D:\Data\khemchyan\daily\MeCN&zd-152.d  
Method tune\_wide.m  
Sample Name MeCN&zd-152  
Comment Sample name: zd-152  
Sample owner: Zdvigkov  
Solvent: MeCN  
Conc.: 0.18 ng/ml

Acquisition Date 11/23/2012 11:48:35 AM

Operator BDAL@DE

Instrument / Ser# maXis 43

### Acquisition Parameter

|             |          |                      |          |                  |           |
|-------------|----------|----------------------|----------|------------------|-----------|
| Source Type | ESI      | Ion Polarity         | Positive | Set Nebulizer    | 0.4 Bar   |
| Focus       | Active   |                      |          | Set Dry Heater   | 180 °C    |
| Scan Begin  | 50 m/z   | Set Capillary        | 4500 V   | Set Dry Gas      | 4.0 l/min |
| Scan End    | 3000 m/z | Set End Plate Offset | -500 V   | Set Divert Valve | Waste     |

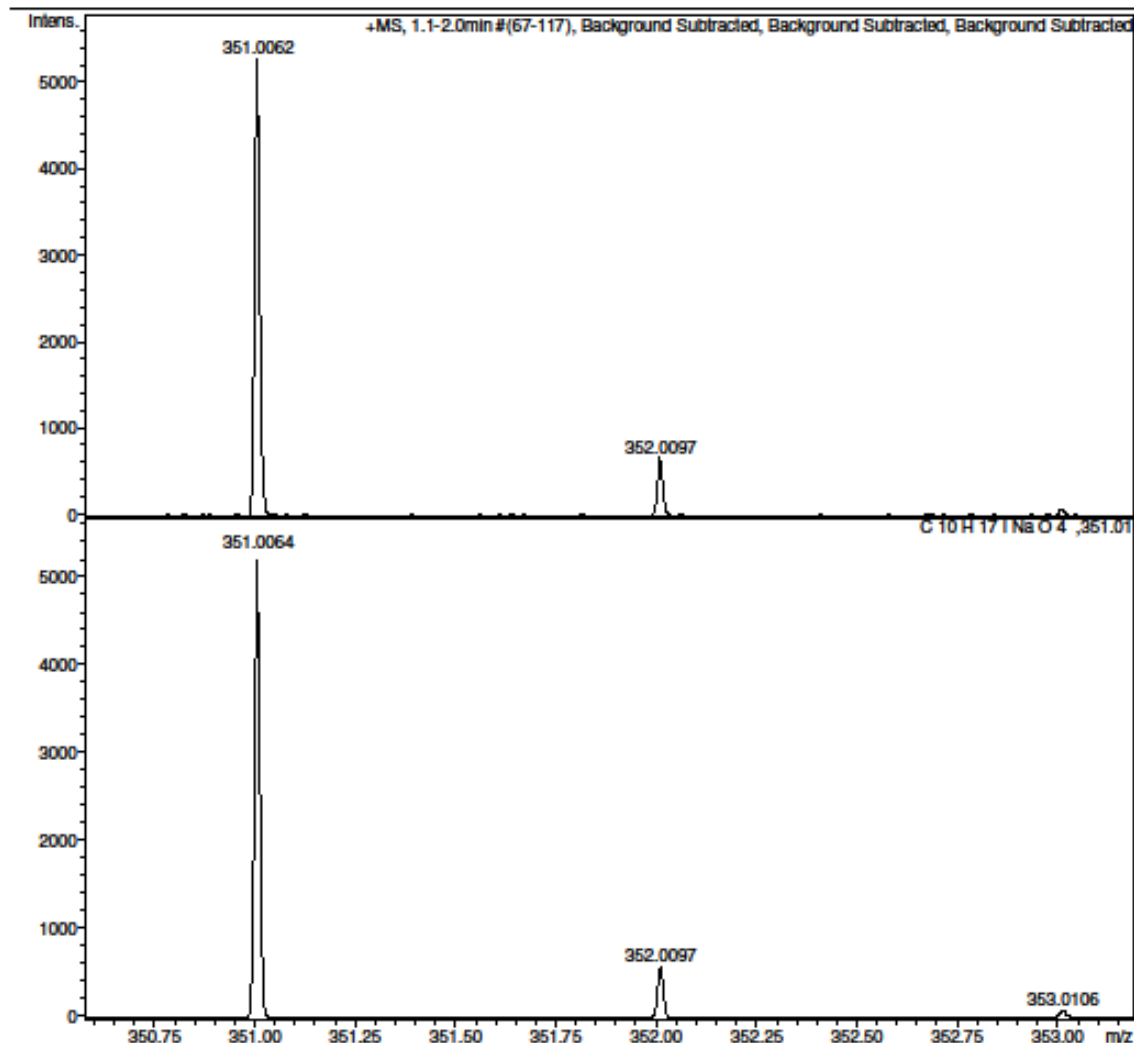

IR 3-Iodo-2-(tetrahydro-2*H*-pyran-2-ylperoxy)tetrahydro-2*H*-pyran (6b)

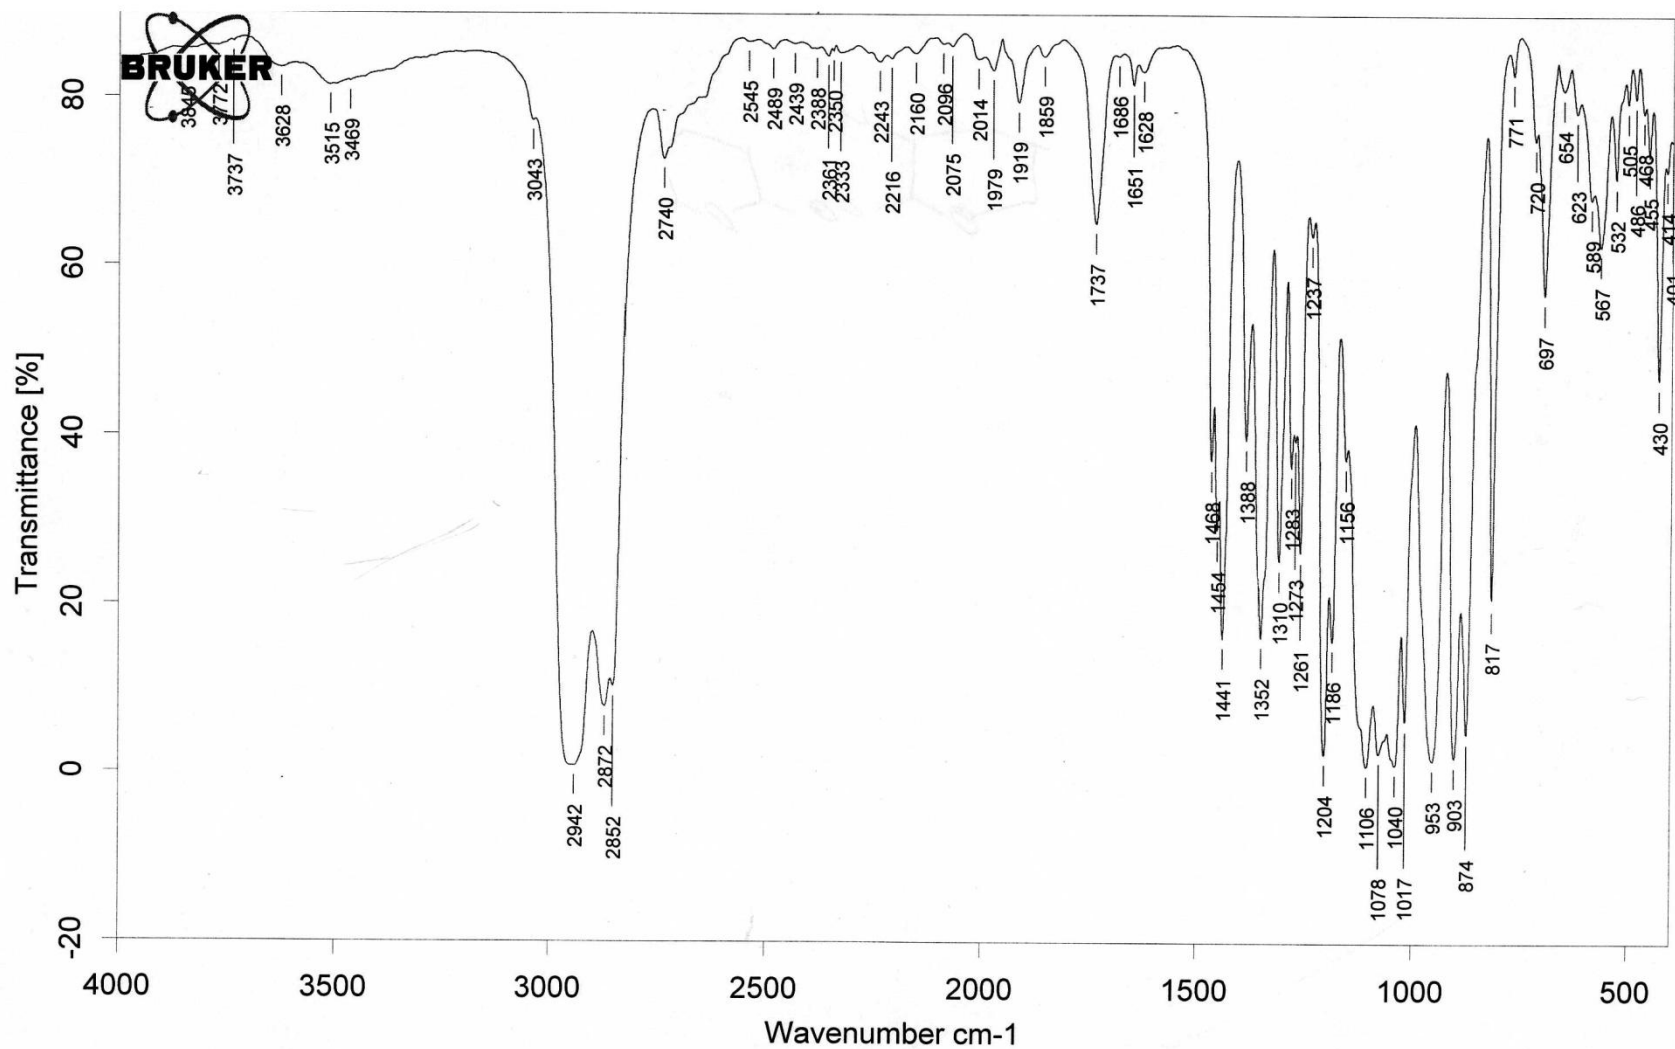

C:\Data\EDL\ZD-152.0

ZDVIZHKOV. ZD-152, thin layer on KBr.

11/12/2012



# <sup>1</sup>H NMR 2,3,4,5,6,7-Hexahydrocyclopenta[b]pyran (10a)

23 Jul 2013

|                               |         |                               |                                                  |                     |                |                     |              |
|-------------------------------|---------|-------------------------------|--------------------------------------------------|---------------------|----------------|---------------------|--------------|
| <b>Acquisition Time (sec)</b> | 1.4418  | <b>Comment</b>                | /TERN_ARZDV576.001 □Opr:Gvozdev V.D.;Solv:CDCl3; |                     | <b>Date</b>    | 22/07/2013 21:06:35 |              |
| <b>File Name</b>              |         |                               | <b>Frequency (MHz)</b>                           | 200.13              | <b>Nucleus</b> | <sup>1</sup> H      |              |
| <b>Number of Transients</b>   | 8       | <b>Original Points Count</b>  | 4096                                             | <b>Points Count</b> | 8192           | <b>Solvent</b>      | CHLOROFORM-D |
| <b>Sweep Width (Hz)</b>       | 2840.91 | <b>Temperature (degree C)</b> | 24.000                                           |                     |                |                     |              |

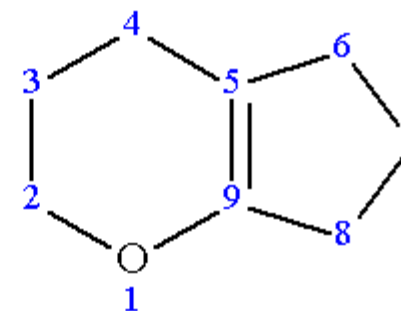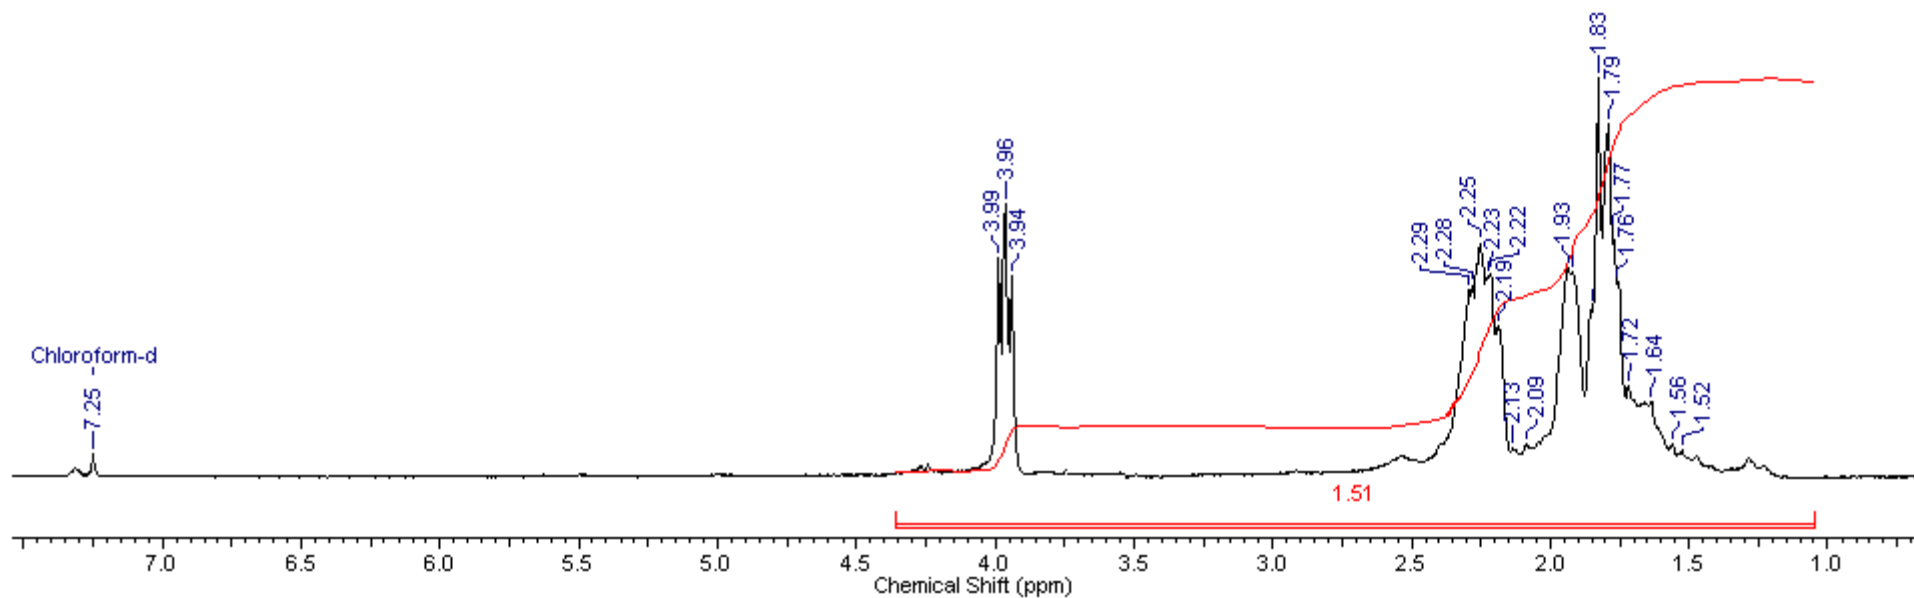

| No. | Annotation   | (ppm) | No. | (ppm)          | Value | Absolute Value |
|-----|--------------|-------|-----|----------------|-------|----------------|
| 1   | Chloroform-d | 7.25  | 1   | [1.04 .. 4.36] | 1.506 | 4.75305e+8     |

<sup>13</sup>C NMR 2,3,4,5,6,7-Hexahydrocyclopenta[*b*]pyran (10a)

25 Jul 2013

|                               |                          |                             |  |                               |  |
|-------------------------------|--------------------------|-----------------------------|--|-------------------------------|--|
| Acquisition Time (sec) 0.9006 |                          | Date 25 Jul 2013 13:45:36   |  |                               |  |
| File Name                     |                          | Frequency (MHz) 75.48       |  |                               |  |
| Nucleus 13C                   | Number of Transients 609 | Original Points Count 16316 |  | Points Count 16384            |  |
| Pulse Sequence zgpg30         | Solvent CHLOROFORM-D     | Sweep Width (Hz) 18115.94   |  | Temperature (degree C) 26.400 |  |

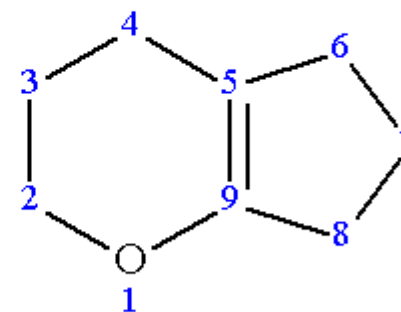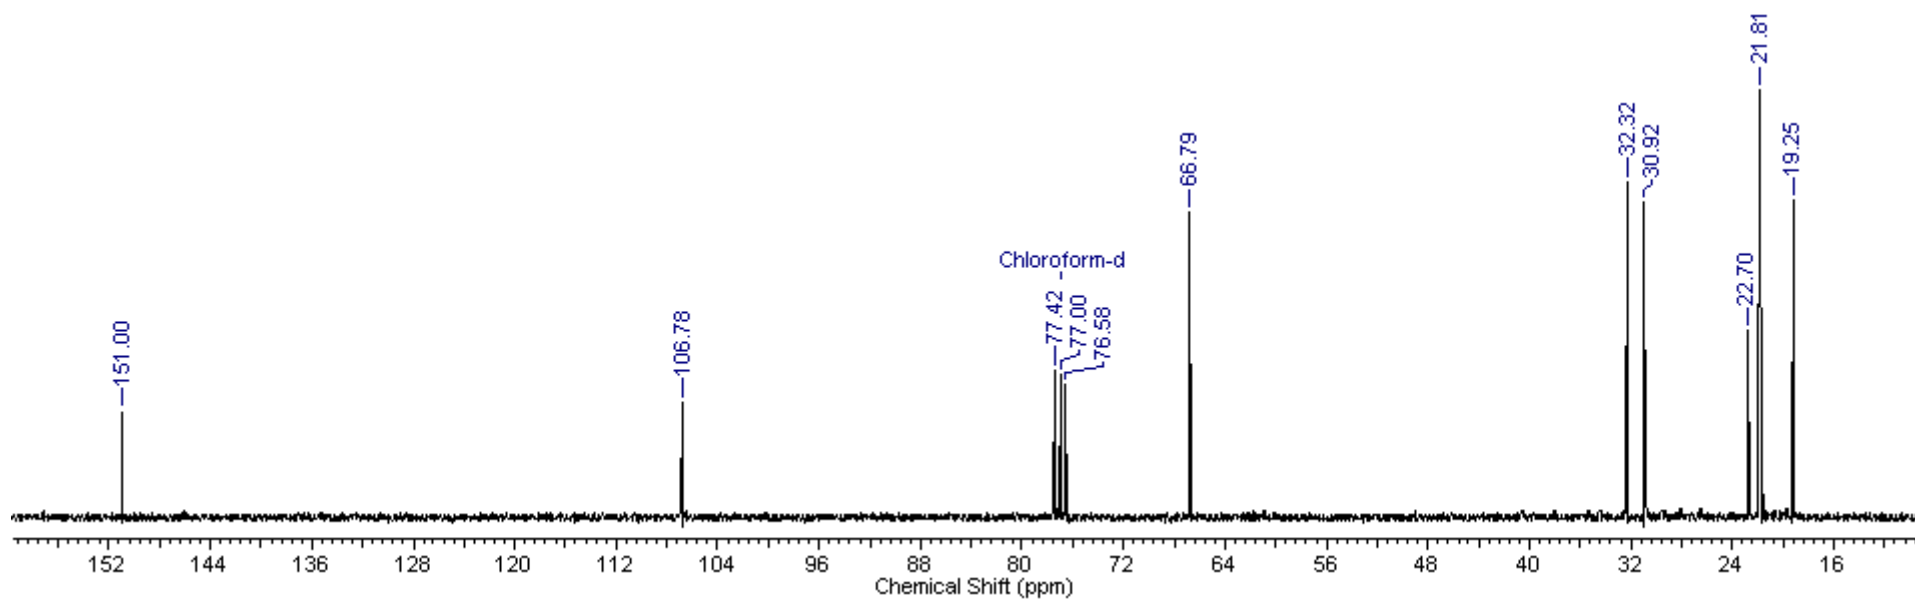

# <sup>1</sup>H NMR 3,4,5,6,7,8-Hexahydro-2H-chromene (10b)

26 Sep 2013

|                      |                                   |                      |                |
|----------------------|-----------------------------------|----------------------|----------------|
| 08 Dec 2012 08:12:43 | Avance-300, 1H, CDCl <sub>3</sub> |                      | 1.351          |
| 300.1                |                                   |                      | File Name      |
| 819                  | 8124                              | Number of Transients | 1              |
| 6009.6               | CHLOROFORM-d                      |                      | Pulse Sequence |
|                      |                                   |                      | 27.800         |

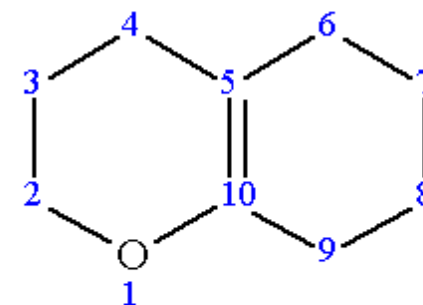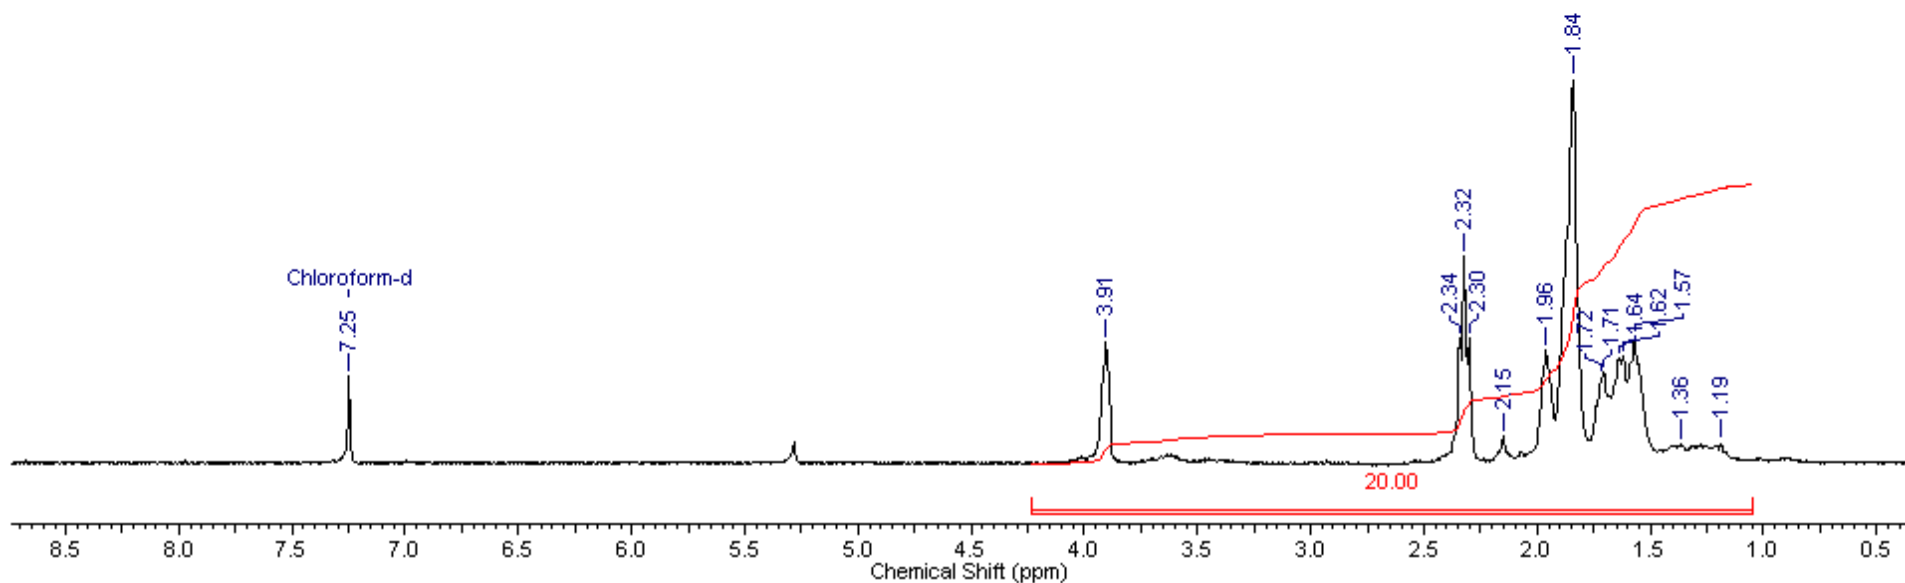

<sup>13</sup>C NMR 3,4,5,6,7,8-Hexahydro-2H-chromene (10b)

26 Sep 2013

|       |                        |         |                       |              |                      |                        |
|-------|------------------------|---------|-----------------------|--------------|----------------------|------------------------|
|       | 08 Dec 2012 12:41:36   | Date    | NMR/5007524           | Comment      | 0.432                | Acquisition Time (sec) |
| 75.48 | Frequency (MHz)        |         |                       |              |                      | File Name              |
| 16384 | Points Count           | 16384   | Original Points Count | 240          | Number of Transients | 130                    |
| 28.30 | Temperature (degree C) | 18867.9 | Sweep Width (Hz)      | CHLOROFORM-D | Solvent              | zpgpg60bas             |
|       |                        |         |                       |              |                      | Pulse Sequence         |

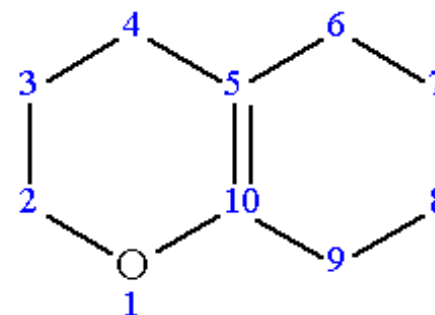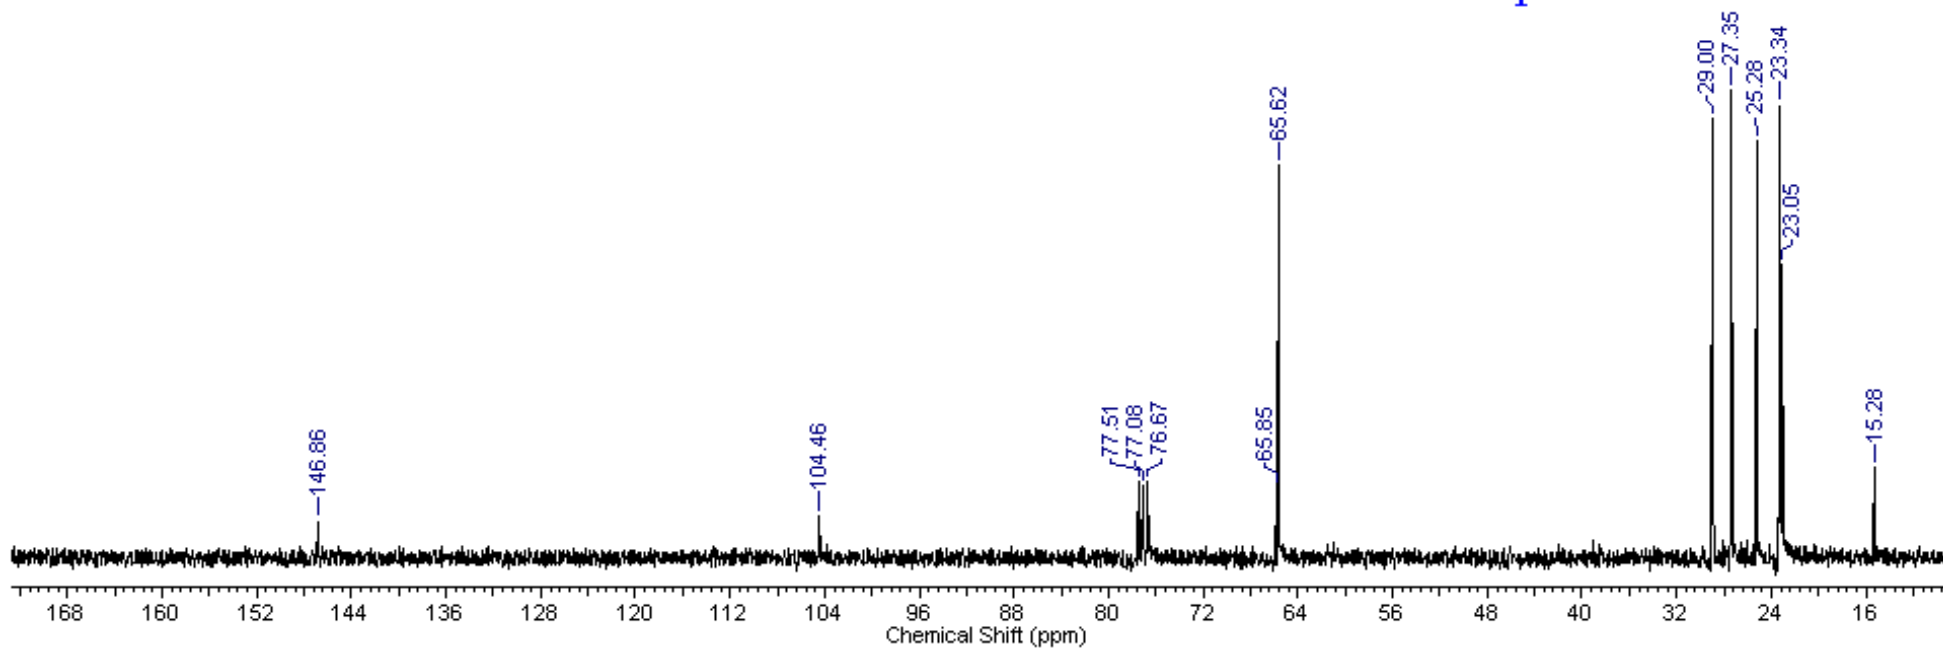

# <sup>1</sup>H NMR 2,3,4,5,6,7,8,9-Octahydrocyclohepta[b]pyran (10c)

26 Sep 2013

|                               |        |                             |                      |                               |                      |
|-------------------------------|--------|-----------------------------|----------------------|-------------------------------|----------------------|
| <b>Acquisition Time (sec)</b> | 0.6759 | <b>Comment</b>              | Avance-300, 1H CDCl3 | <b>Date</b>                   | 16 Nov 2012 08:17:04 |
| <b>File Name</b>              |        |                             |                      | <b>Frequency (MHz)</b>        | 300.13               |
| <b>Nucleus</b>                | 1H     | <b>Number of Transients</b> | 1                    | <b>Original Points Count</b>  | 8124                 |
| <b>Pulse Sequence</b>         | zg     | <b>Solvent</b>              | CHLOROFORM-D         | <b>Sweep Width (Hz)</b>       | 6009.62              |
|                               |        |                             |                      | <b>Points Count</b>           | 8192                 |
|                               |        |                             |                      | <b>Temperature (degree C)</b> | 26.800               |

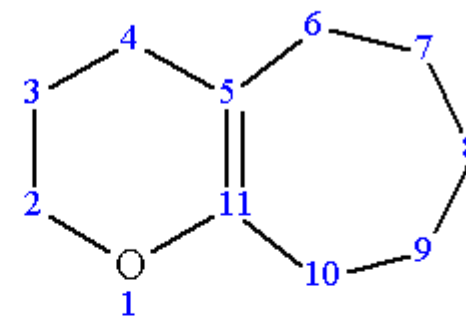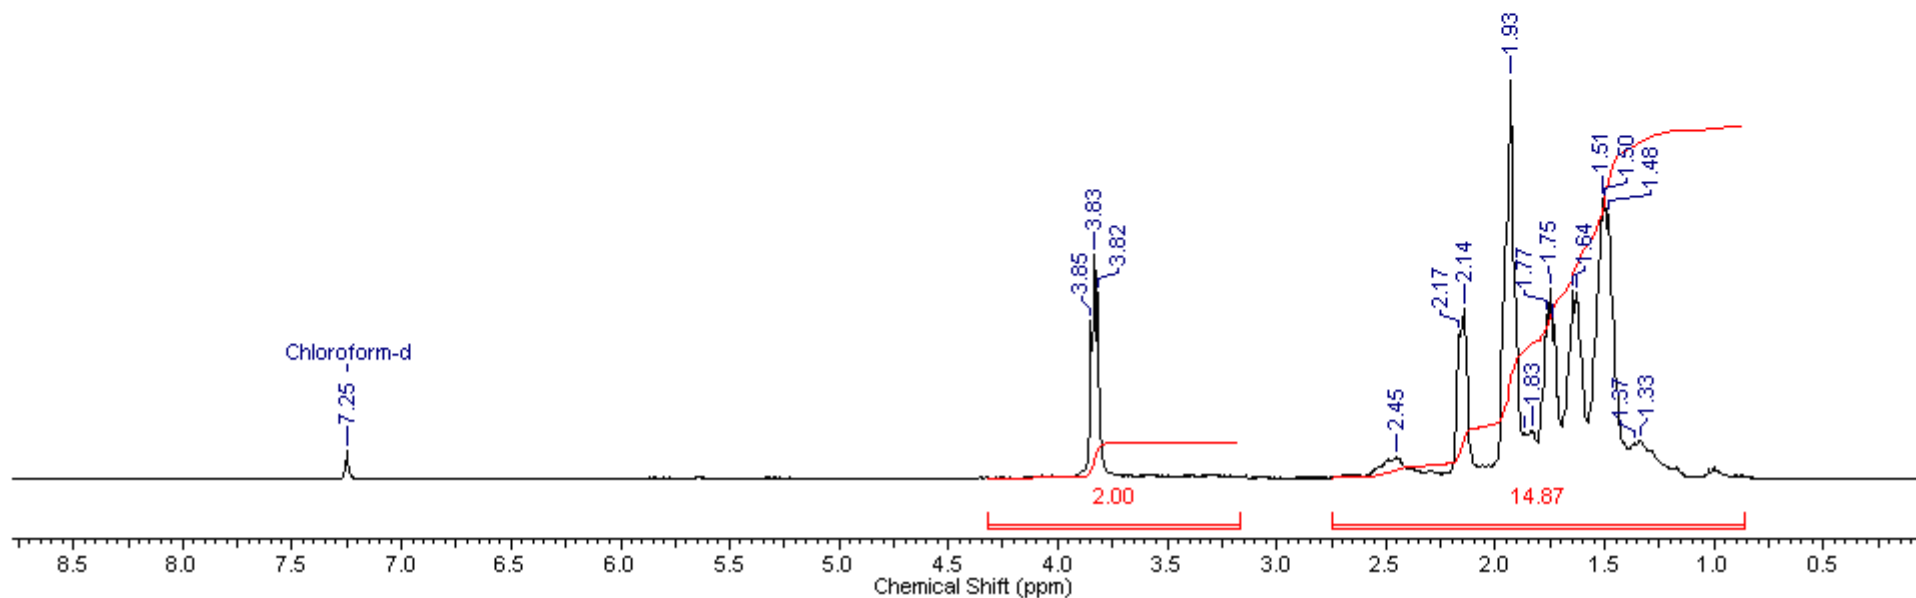

<sup>13</sup>C NMR 2,3,4,5,6,7,8,9-Octahydrocyclohepta[*b*]pyran (10c)

23 Jul 2013

|                                      |  |                                  |  |                                    |                                      |       |
|--------------------------------------|--|----------------------------------|--|------------------------------------|--------------------------------------|-------|
| <b>Acquisition Time (sec)</b> 0.8643 |  | <b>Date</b> 17 Nov 2012 09:38:08 |  |                                    |                                      |       |
| <b>File Name</b>                     |  |                                  |  |                                    | <b>Frequency (MHz)</b>               | 75.48 |
| <b>Nucleus</b> 13C                   |  | <b>Number of Transients</b> 216  |  | <b>Original Points Count</b> 16308 | <b>Points Count</b>                  | 16384 |
| <b>Pulse Sequence</b> zgpg30base     |  | <b>Solvent</b> CHLOROFORM-D      |  | <b>Sweep Width (Hz)</b> 18867.92   | <b>Temperature (degree C)</b> 27.700 |       |

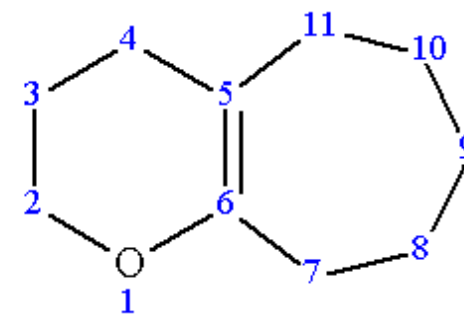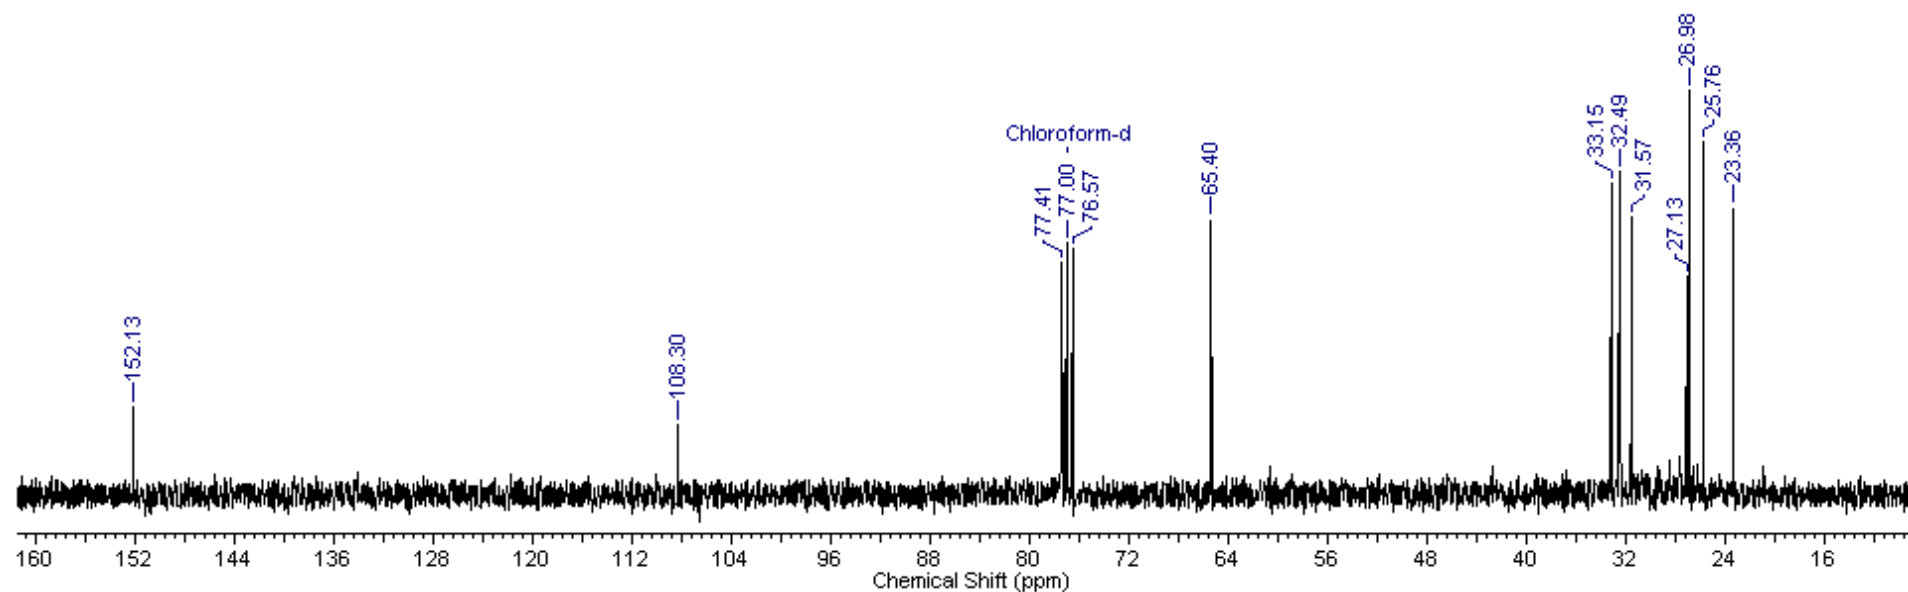

<sup>1</sup>H NMR 4a-Iodoctahydrocyclohepta[b]pyran-9a(2H)-yl hydroperoxide (11b)

|                        |        |         |              |                        |                     |
|------------------------|--------|---------|--------------|------------------------|---------------------|
| Acquisition Time (sec) | 1.0240 | Comment |              | Date                   | 25/03/2008 15:16:27 |
| File Name              |        |         |              |                        |                     |
| Frequency (MHz)        | 200.13 | Nucleus | 1H           | Number of Transients   | 12                  |
| Points Count           | 8192   | Solvent | CHLOROFORM-D | Original Points Count  | 8192                |
|                        |        |         |              | Sweep Width (Hz)       | 4000.00             |
|                        |        |         |              | Temperature (degree C) | 24.000              |

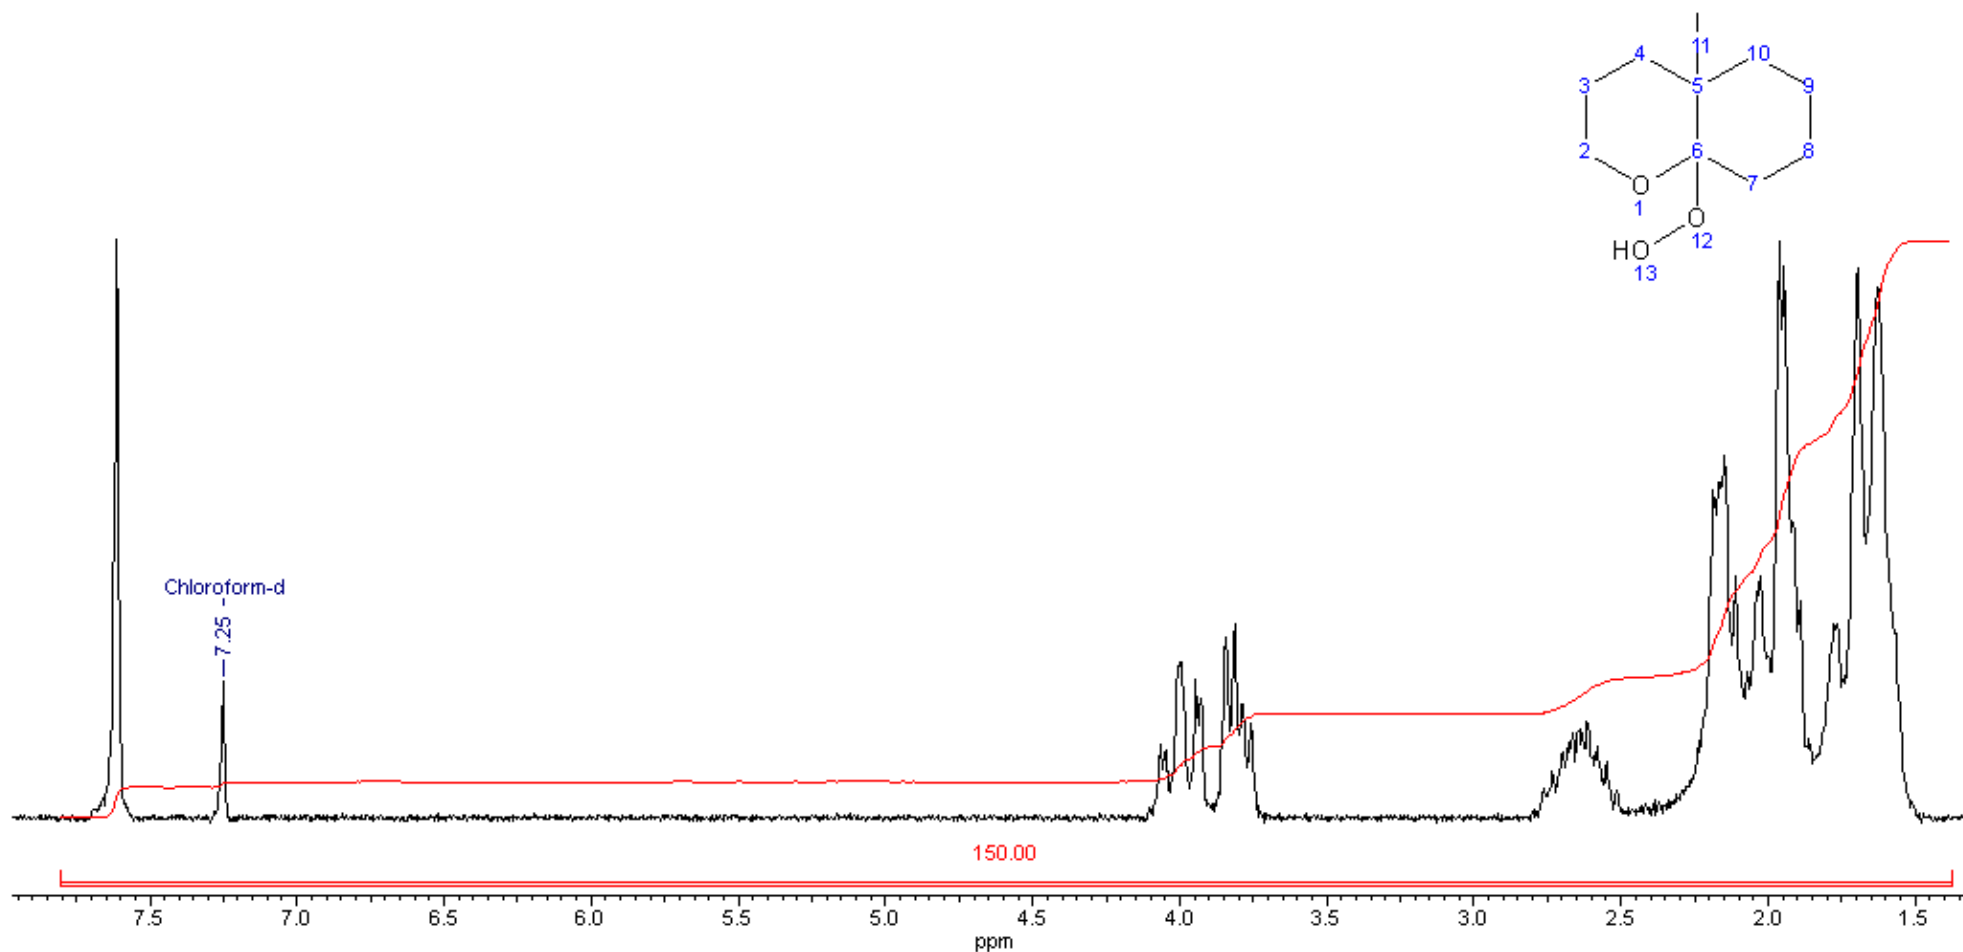

<sup>13</sup>C NMR 4a-Iodoctahydrocyclohepta[b]pyran-9a(2H)-yl hydroperoxide (11b)

|                               |              |                         |                       |                               |                      |
|-------------------------------|--------------|-------------------------|-----------------------|-------------------------------|----------------------|
| <b>Acquisition Time (sec)</b> | 0.4501       | <b>Comment</b>          | Avance-300, cdcl3;tem | <b>Date</b>                   | 25 Mar 2008 15:23:44 |
| <b>File Name</b>              |              |                         |                       |                               |                      |
| <b>Frequency (MHz)</b>        | 75.48        | <b>Nucleus</b>          | 13C                   | <b>Number of Transients</b>   | 267                  |
| <b>Original Points Count</b>  | 16308        | <b>Points Count</b>     | 16384                 | <b>Pulse Sequence</b>         | zgpg30base           |
| <b>Solvent</b>                | CHLOROFORM-D | <b>Sweep Width (Hz)</b> | 18115.94              | <b>Temperature (degree C)</b> | 21.200               |

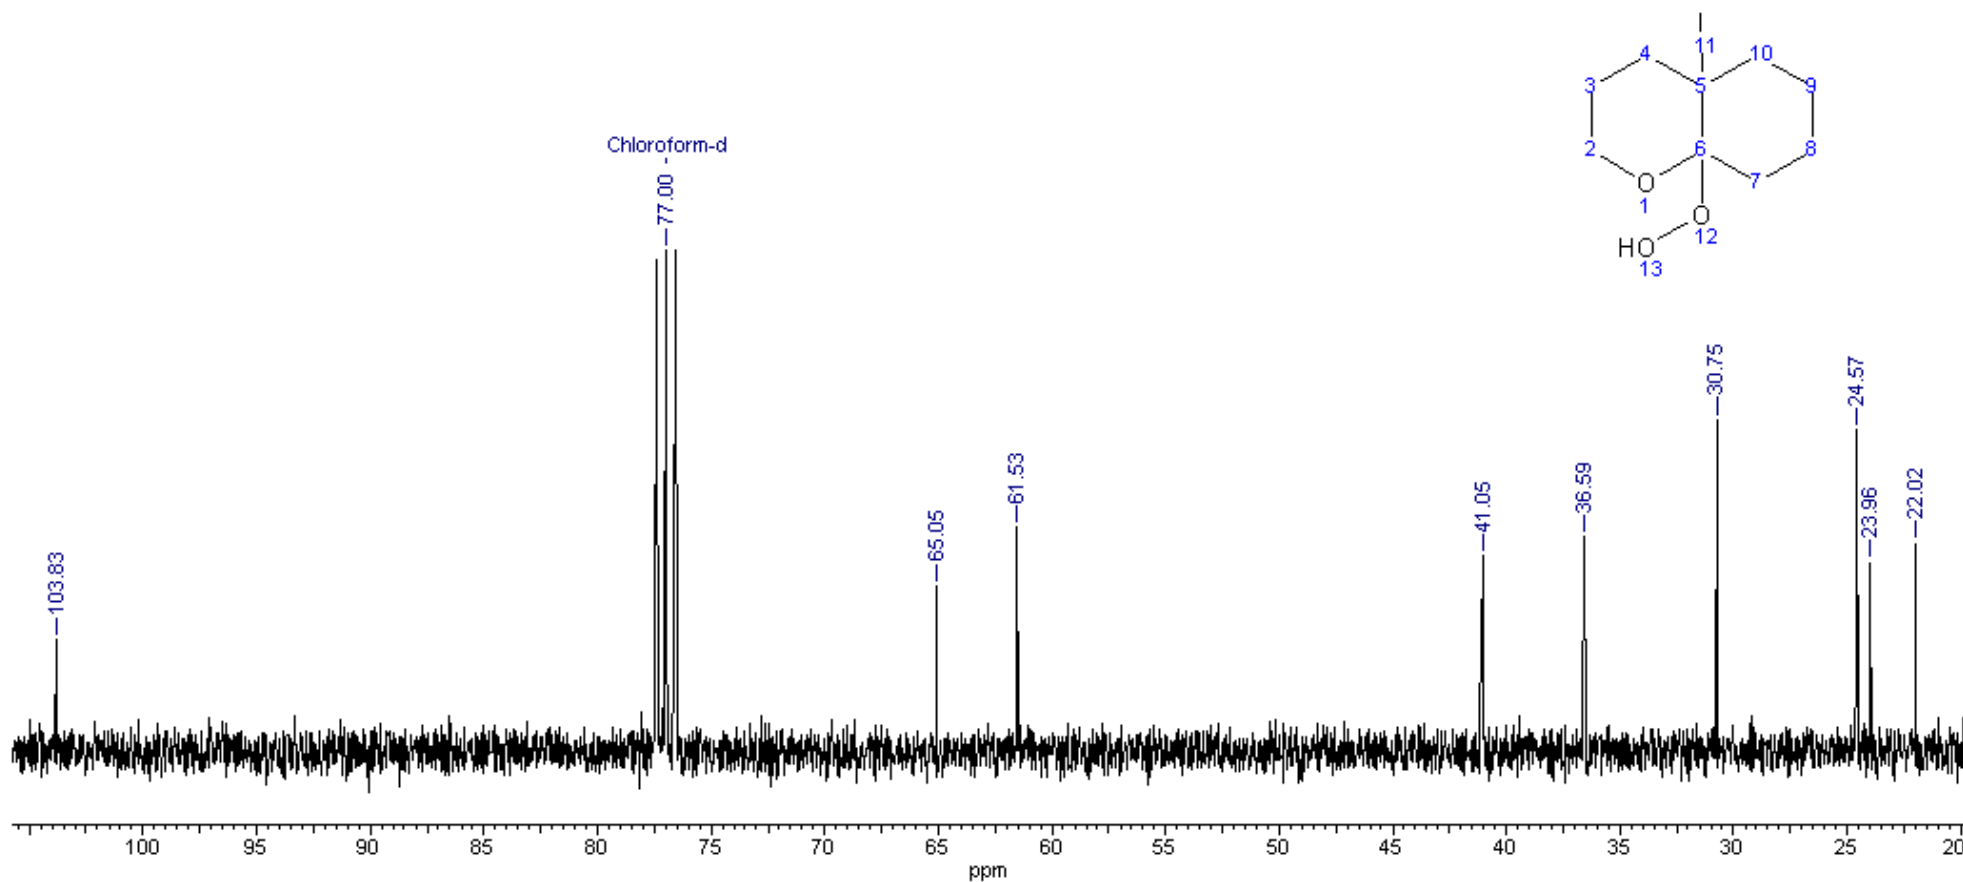



# HRMS 4a-Iodoctahydrocyclohepta[b]pyran-9a(2H)-yl hydroperoxide (11b)

## Display Report

### Analysis Info

Analysis Name D:\Data\chemchyan\daily\MeCN&zd-96\_1\_low.d  
Method tune\_low.m  
Sample Name MeCN&zd-96\_1\_low  
Comment Samplename: zd-96\_1  
Solvent: MeCN

Acquisition Date 10/5/2012 7:12:12 PM

Operator BDAL@DE  
Instrument maXis 43

### Acquisition Parameter

|             |            |                       |           |                  |           |
|-------------|------------|-----------------------|-----------|------------------|-----------|
| Source Type | ESI        | Ion Polarity          | Positive  | Set Nebulizer    | 0.4 Bar   |
| Focus       | Not active | Set Capillary         | 4500 V    | Set Dry Heater   | 180 °C    |
| Scan Begin  | 50 m/z     | Set End Plate Offset  | -500 V    | Set Dry Gas      | 4.0 l/min |
| Scan End    | 3000 m/z   | Set Collision Cell RF | 300.0 Vpp | Set Divert Valve | Source    |

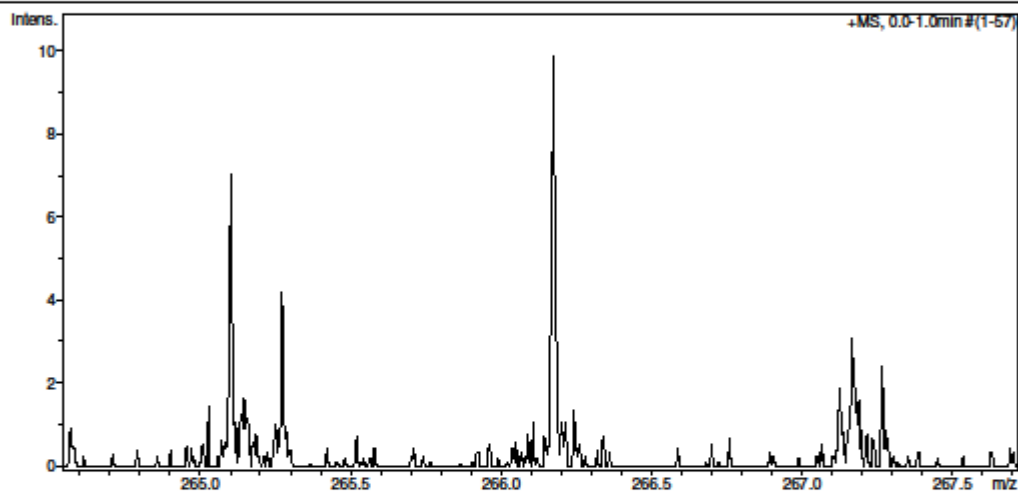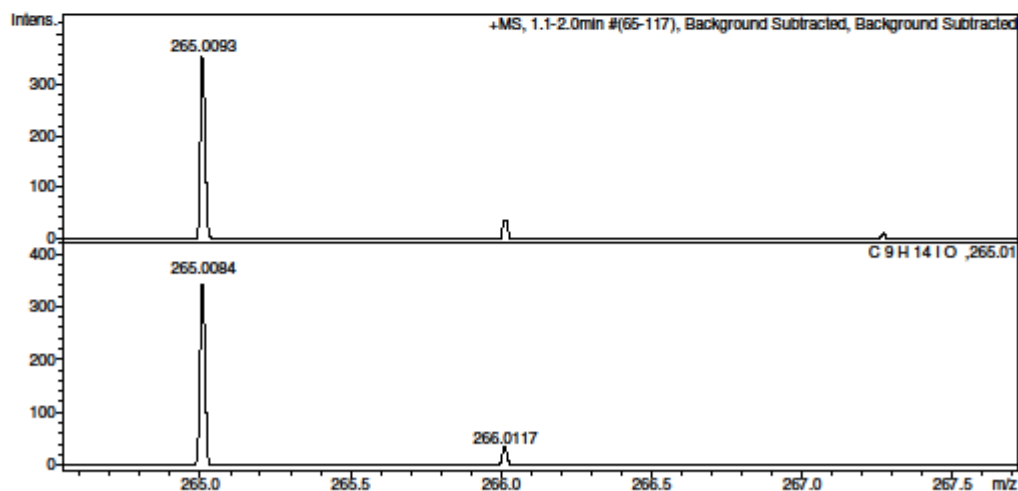

IR 4a-Iodoctahydrocyclohepta[*b*]pyran-9a(2*H*)-yl hydroperoxide (11b)

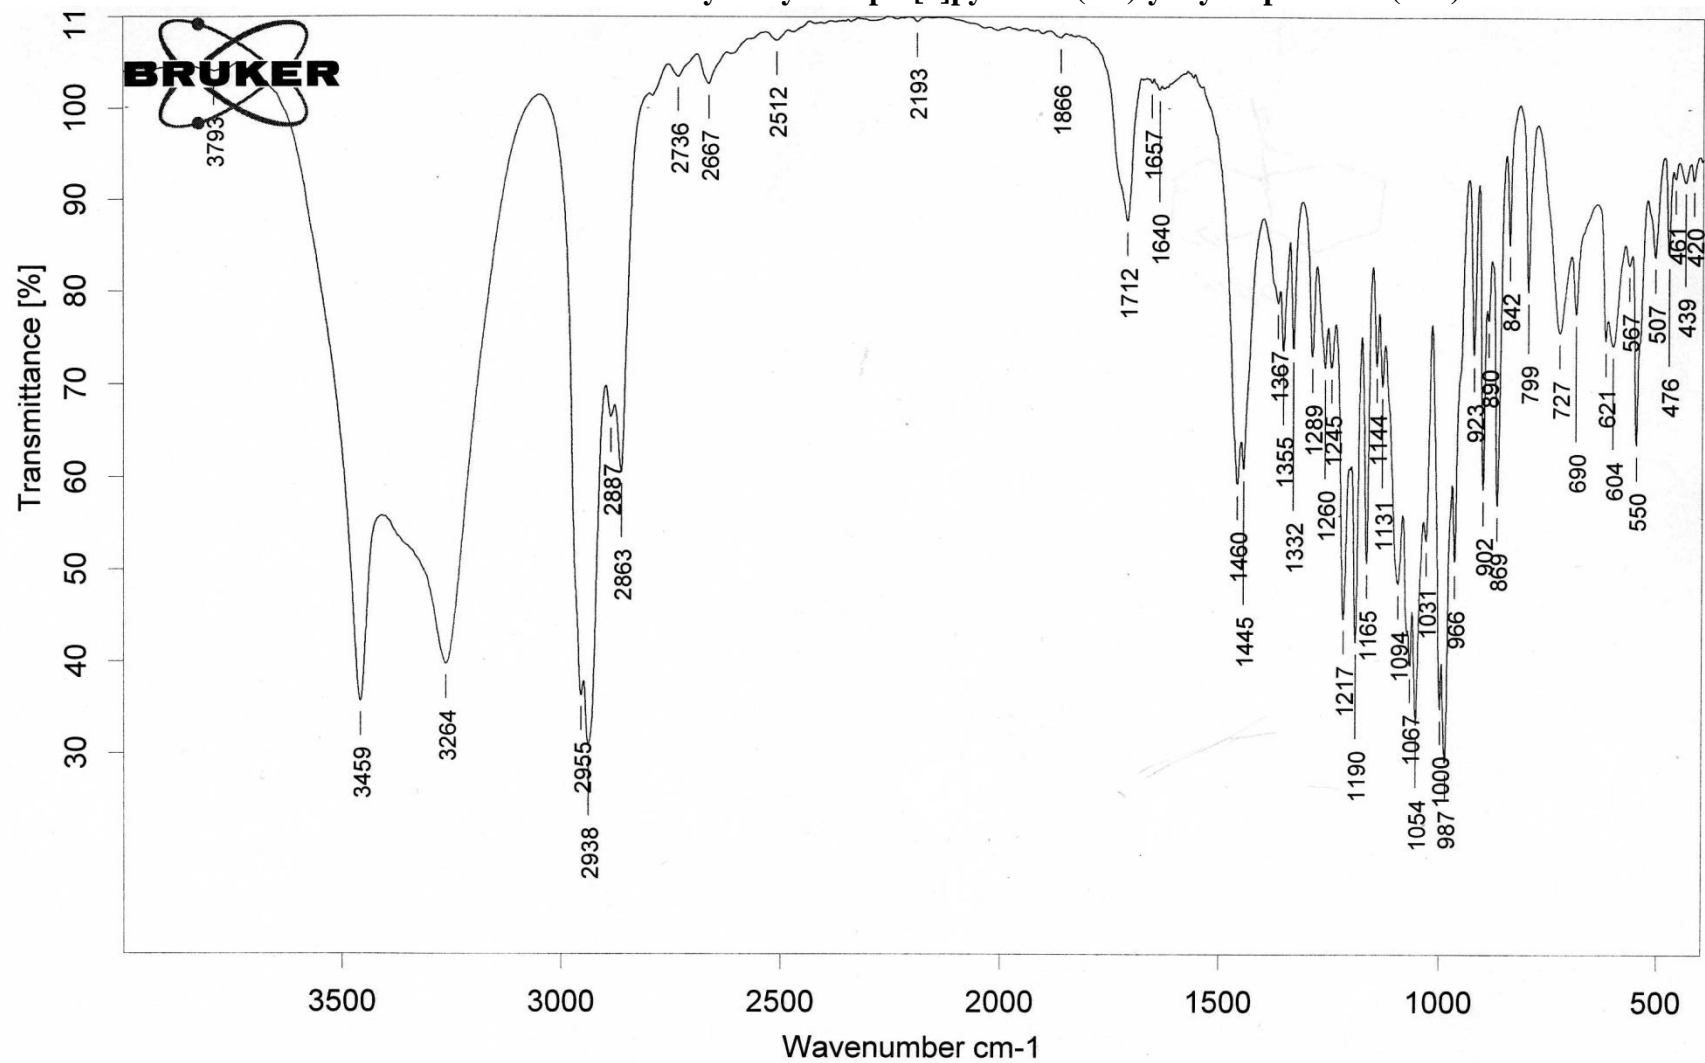

D:\EDL\Zd-96.0 ЗДВИЖКОВ. Zd-96, прессовка KBr, 1/200.

19.02.2013

<sup>1</sup>H NMR 4a-Iodoctahydrocyclohepta[b]pyran-9a(2H)-yl hydroperoxide (11c)

4 Jul 2013

|                        |        |                      |                |                        |                      |
|------------------------|--------|----------------------|----------------|------------------------|----------------------|
| Acquisition Time (sec) | 0.6759 | Comment              | /TERN ARZDV114 | Date                   | 22 Nov 2012 13:45:36 |
| File Name              |        |                      |                | Frequency (MHz)        | 300.13               |
| Nucleus                | 1H     | Number of Transients | 1              | Original Points Count  | 8124                 |
|                        |        |                      |                | Points Count           | 8192                 |
| Pulse Sequence         | zg     | Solvent              | CHLOROFORM-D   | Sweep Width (Hz)       | 6009.62              |
|                        |        |                      |                | Temperature (degree C) | 27.000               |

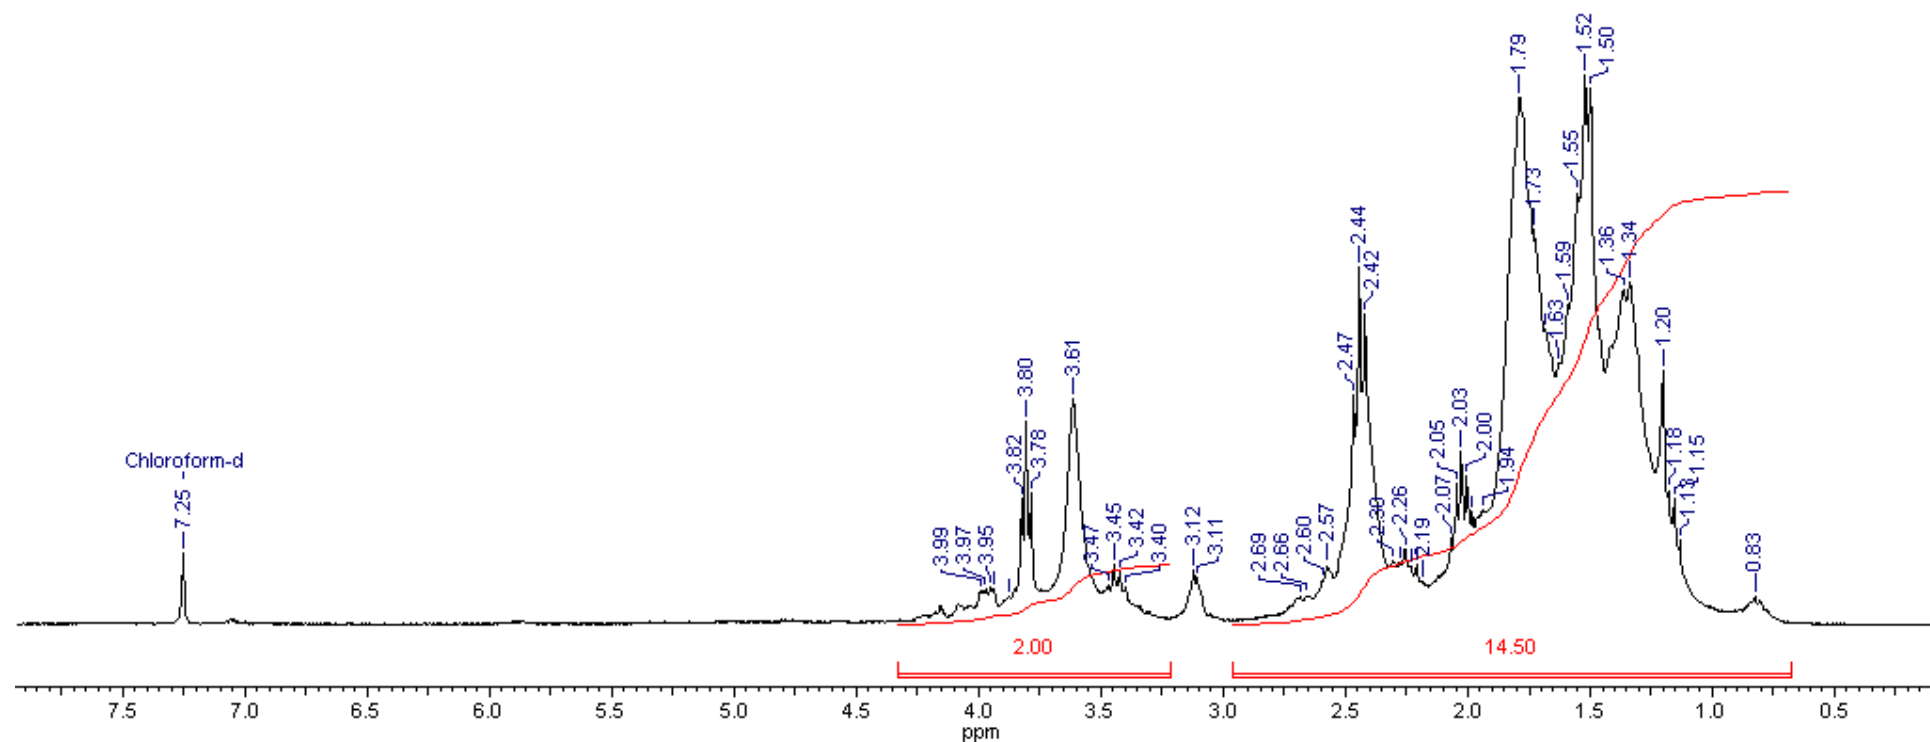

<sup>13</sup>C NMR 4a-Iodoctahydrocyclohepta[b]pyran-9a(2H)-yl hydroperoxide (11c)

5 Nov 2013

|                        |              |                      |                           |                        |          |
|------------------------|--------------|----------------------|---------------------------|------------------------|----------|
| Acquisition Time (sec) | 0.9002       | Comment              | Avance-300, C-13, DMSO-d6 | Date                   |          |
| File Name              |              |                      |                           | Frequency (MHz)        | 75.48    |
| Nucleus                | 13C          | Number of Transients | 405                       | Original Points Count  | 16308    |
| Pulse Sequence         | zgpg baseopt | Solvent              | CHLOROFORM-D              | Sweep Width (Hz)       | 18115.94 |
|                        |              |                      |                           | Points Count           | 16384    |
|                        |              |                      |                           | Temperature (degree C) | 30.000   |

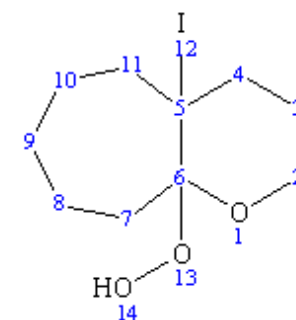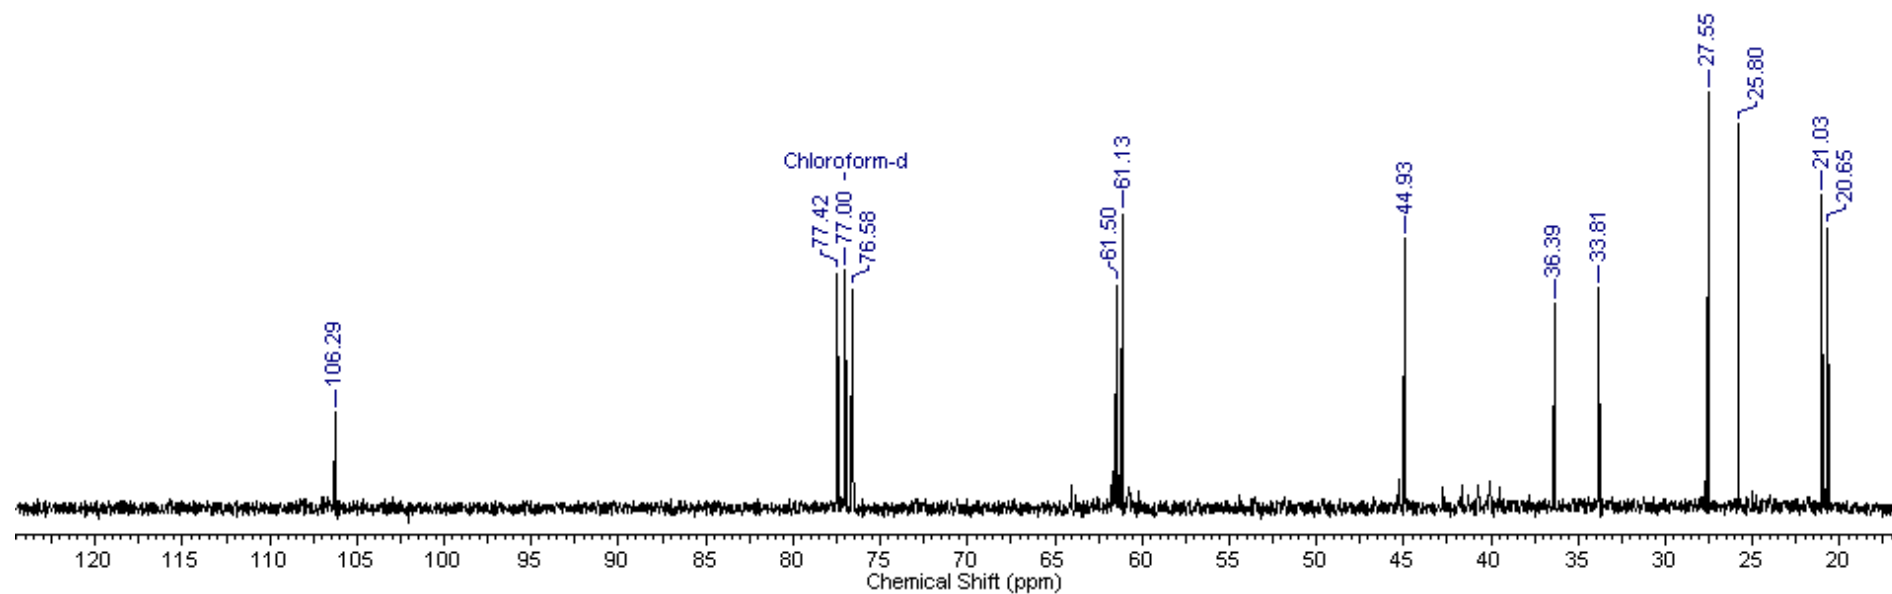

# HRMS 4a-Iodoctahydrocyclohepta[b]pyran-9a(2H)-yl hydroperoxide (11c)

## Display Report

### Analysis Info

Analysis Name D:\Data\Ivanova\ZD-363low.d  
Method tune\_low.m  
Sample Name /TERN ZD-363low  
Comment CH3CN 100 %, dil. 1000, calibrant added

Acquisition Date 01.11.2013 19:32:55

Operator BDAL@DE  
Instrument / Ser# microTOF 10248

### Acquisition Parameter

|             |            |                      |          |                  |           |
|-------------|------------|----------------------|----------|------------------|-----------|
| Source Type | ESI        | Ion Polarity         | Positive | Set Nebulizer    | 0.4 Bar   |
| Focus       | Not active |                      |          | Set Dry Heater   | 180 °C    |
| Scan Begin  | 50 m/z     | Set Capillary        | 4500 V   | Set Dry Gas      | 4.0 l/min |
| Scan End    | 3000 m/z   | Set End Plate Offset | -500 V   | Set Divert Valve | Waste     |

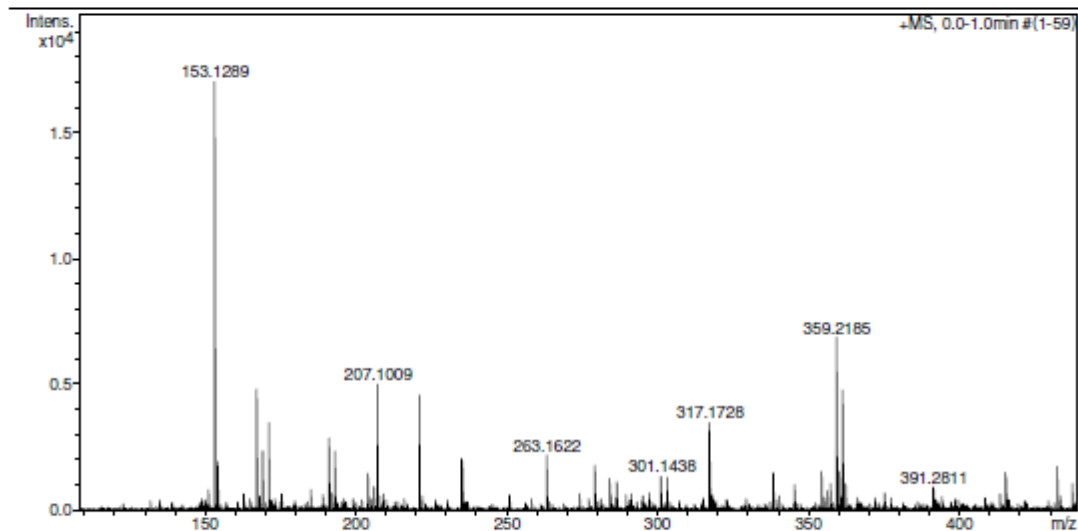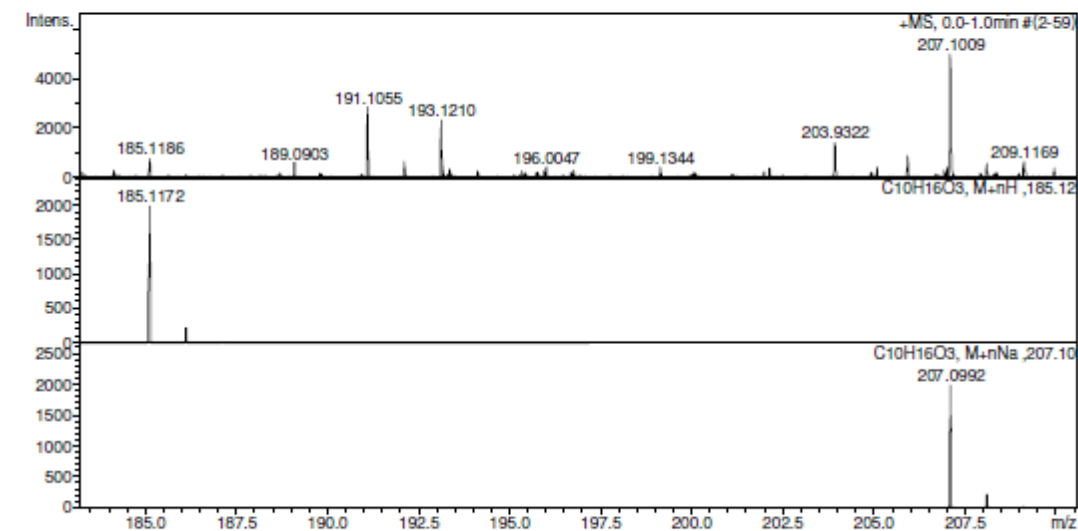

IR 4a-Iodoctahydrocyclohepta[*b*]pyran-9a(2*H*)-yl hydroperoxide (11c)

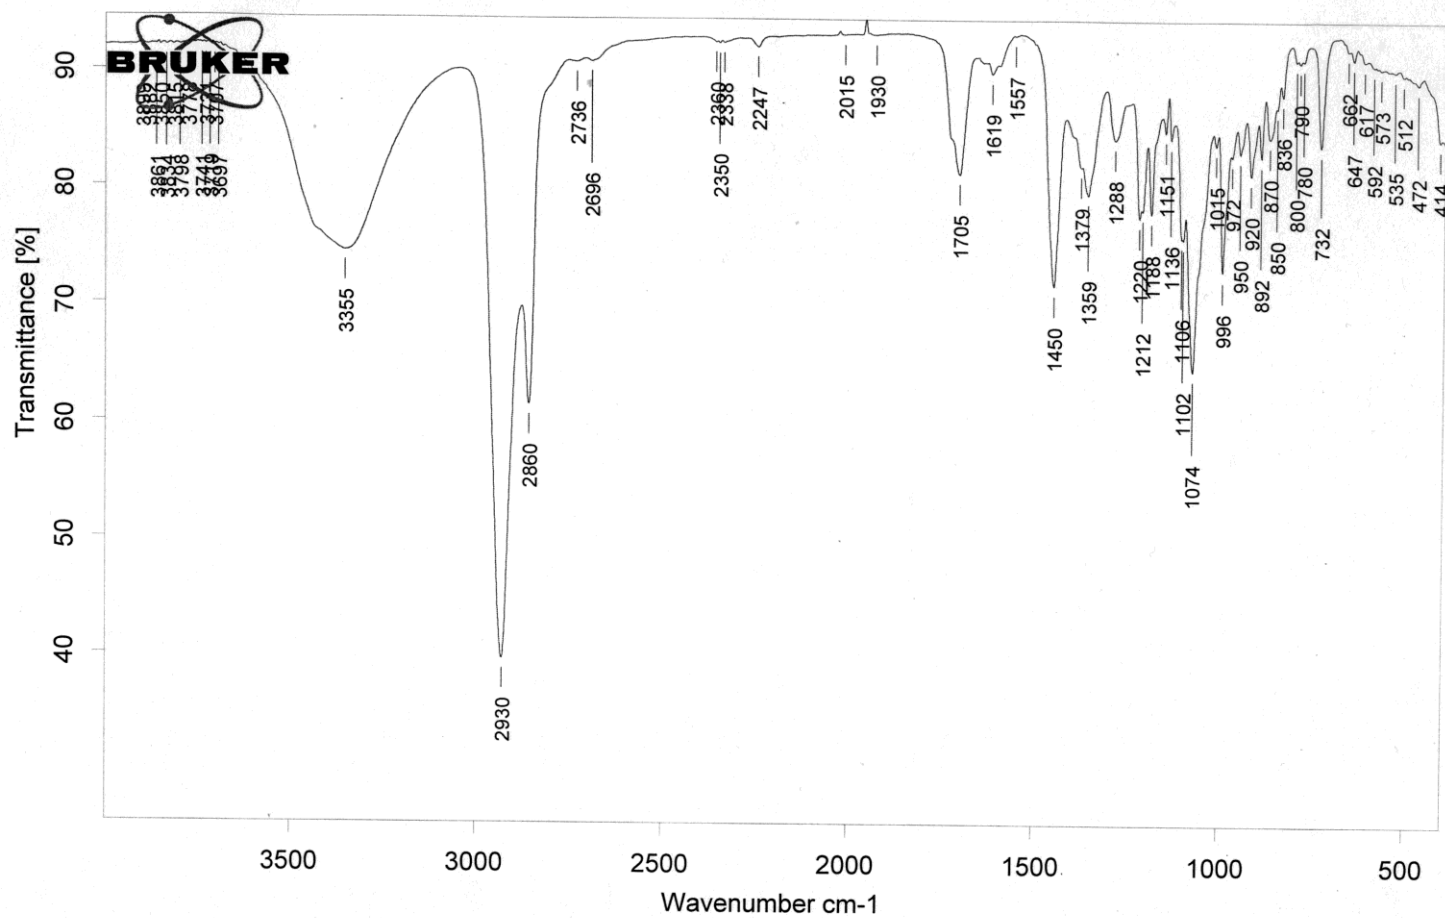

# <sup>1</sup>H NMR 7a-(*tert*-Butylperoxy)octahydrocyclopenta[*b*]pyran (12a)

2 Jul 2013

|                               |         |                               |              |                              |                      |
|-------------------------------|---------|-------------------------------|--------------|------------------------------|----------------------|
| <b>Acquisition Time (sec)</b> | 0.6759  | <b>Comment</b>                | NMR/50075654 | <b>Date</b>                  | 07 Nov 2012 09:29:36 |
| <b>File Name</b>              |         |                               |              |                              |                      |
| <b>Frequency (MHz)</b>        | 300.13  | <b>Nucleus</b>                | 1H           | <b>Number of Transients</b>  | 1                    |
| <b>Points Count</b>           | 8192    | <b>Pulse Sequence</b>         | zg           | <b>Original Points Count</b> | 8124                 |
| <b>Sweep Width (Hz)</b>       | 6009.62 | <b>Temperature (degree C)</b> | 27.300       | <b>Solvent</b>               | CHLOROFORM-D         |

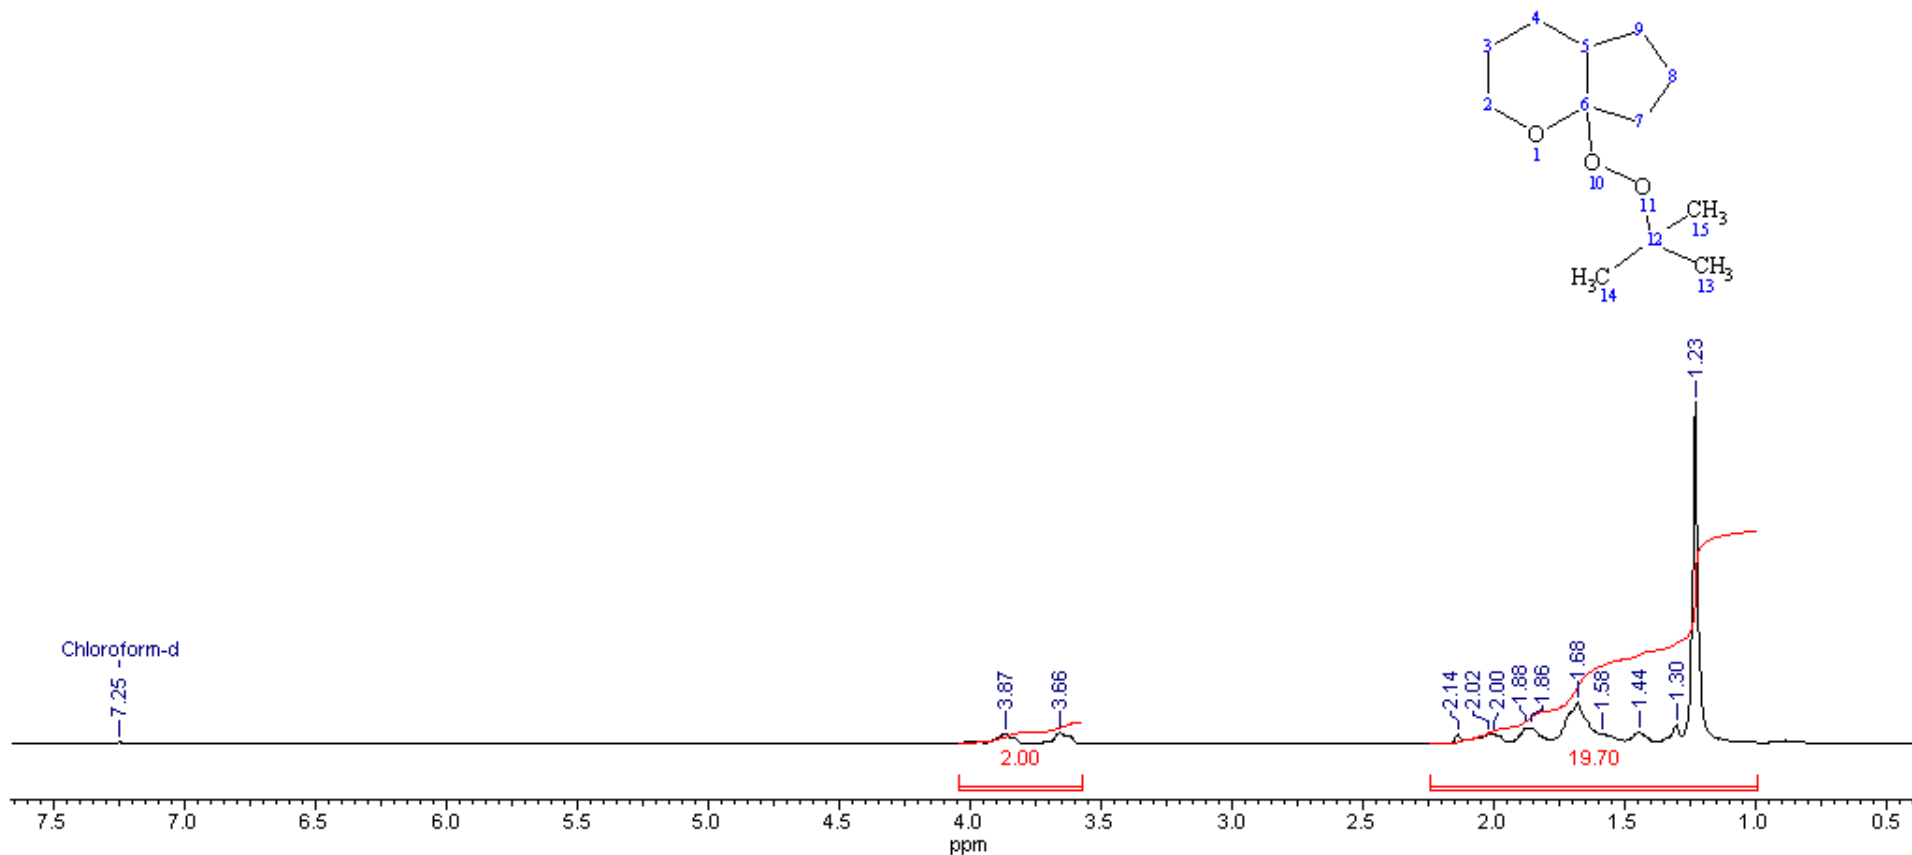

<sup>13</sup>C NMR 7a-(*tert*-Butylperoxy)octahydrocyclopenta[*b*]pyran (12a)

2 Jul 2013

|                               |            |                             |                                     |                               |                      |
|-------------------------------|------------|-----------------------------|-------------------------------------|-------------------------------|----------------------|
| <b>Acquisition Time (sec)</b> | 0.4501     | <b>Comment</b>              | Avance-300, C-13, CDCl <sub>3</sub> | <b>Date</b>                   | 07 Nov 2012 09:33:52 |
| <b>File Name</b>              |            |                             |                                     | <b>Frequency (MHz)</b>        | 75.48                |
| <b>Nucleus</b>                | 13C        | <b>Number of Transients</b> | 481                                 | <b>Original Points Count</b>  | 16308                |
| <b>Pulse Sequence</b>         | zgpg30base | <b>Solvent</b>              | CHLOROFORM-D                        | <b>Sweep Width (Hz)</b>       | 18115.94             |
|                               |            |                             |                                     | <b>Points Count</b>           | 16384                |
|                               |            |                             |                                     | <b>Temperature (degree C)</b> | 27.500               |

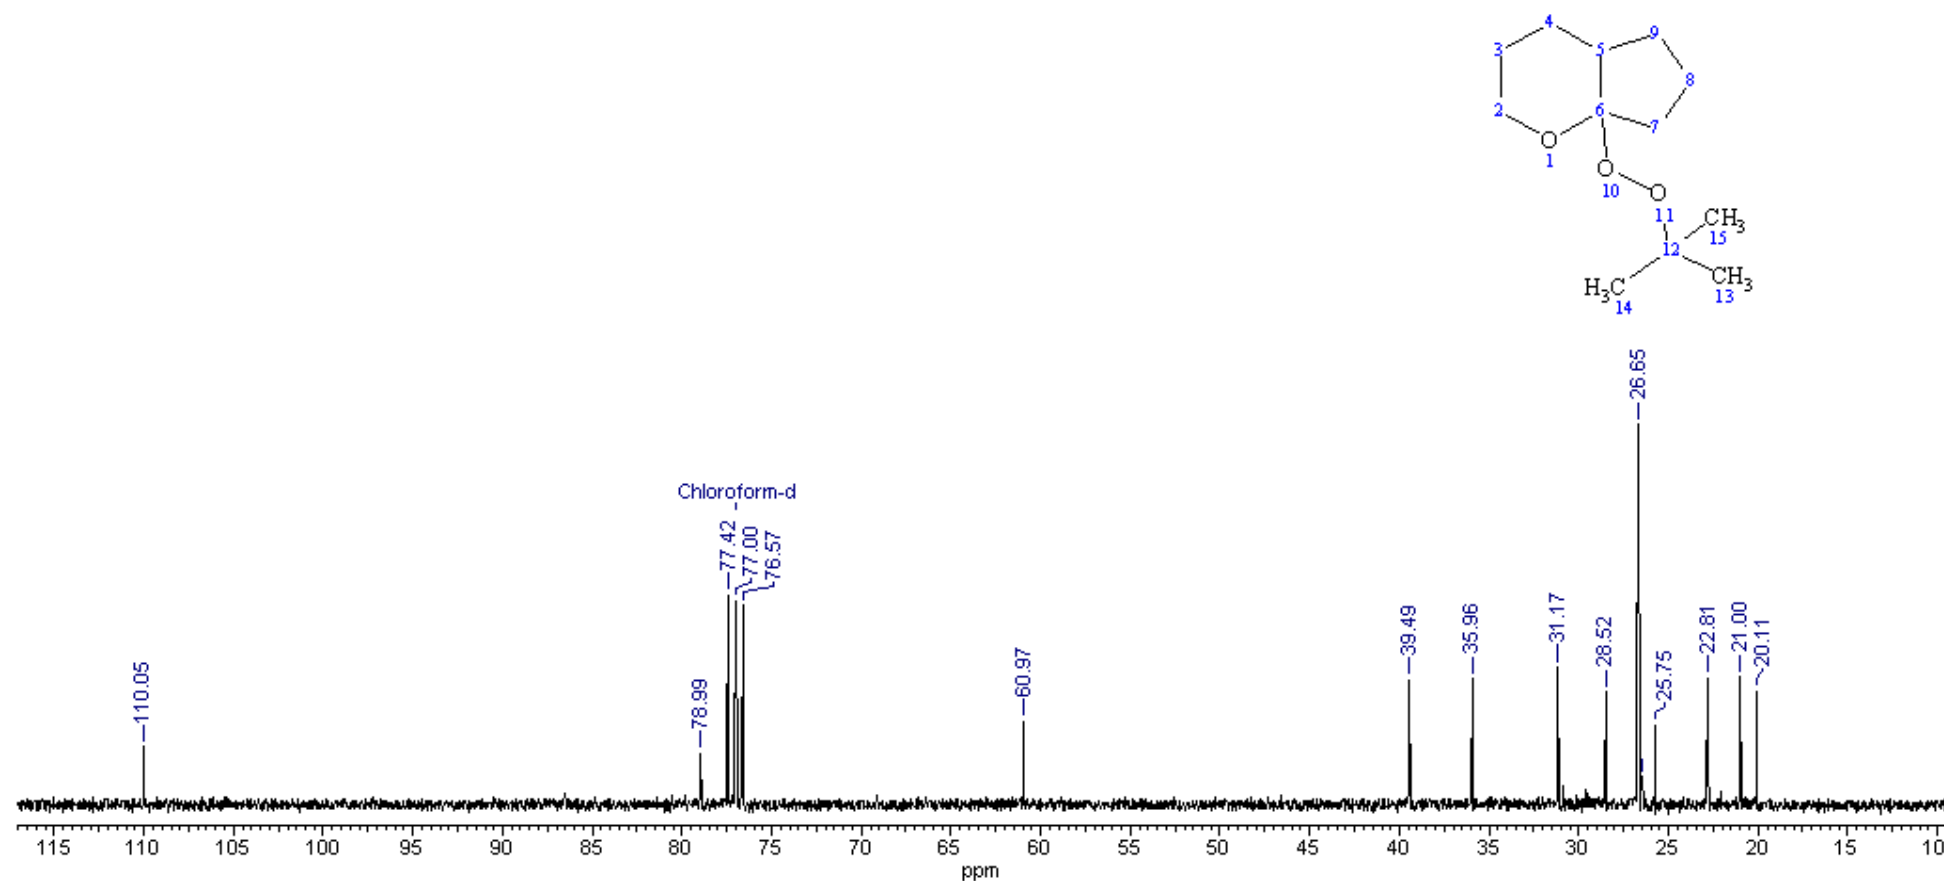



# HRMS 7a-(*tert*-Butylperoxy)octahydrocyclopenta[*b*]pyran (12a)

## Display Report

### Analysis Info

Analysis Name D:\Data\khemchyan\MS service @ IOC\zdvigkov\14\_11\_2012\MeCN&zd-147\_low.d  
Method tune\_low.m  
Sample Name MeCN&zd-147\_low  
Comment Sample name: zd-147  
Sample owner: Zdvigkov A  
Solvent: MeCN  
Dil : 500 times

Acquisition Date 14.11.2012 18:45:29

Operator BDAL@DE

Instrument maXis 43

### Acquisition Parameter

|             |            |                       |           |                  |           |
|-------------|------------|-----------------------|-----------|------------------|-----------|
| Source Type | ESI        | Ion Polarity          | Positive  | Set Nebulizer    | 0.4 Bar   |
| Focus       | Not active | Set Capillary         | 4500 V    | Set Dry Heater   | 180 °C    |
| Scan Begin  | 50 m/z     | Set End Plate Offset  | -500 V    | Set Dry Gas      | 4.0 l/min |
| Scan End    | 3000 m/z   | Set Collision Cell RF | 300.0 Vpp | Set Divert Valve | Source    |

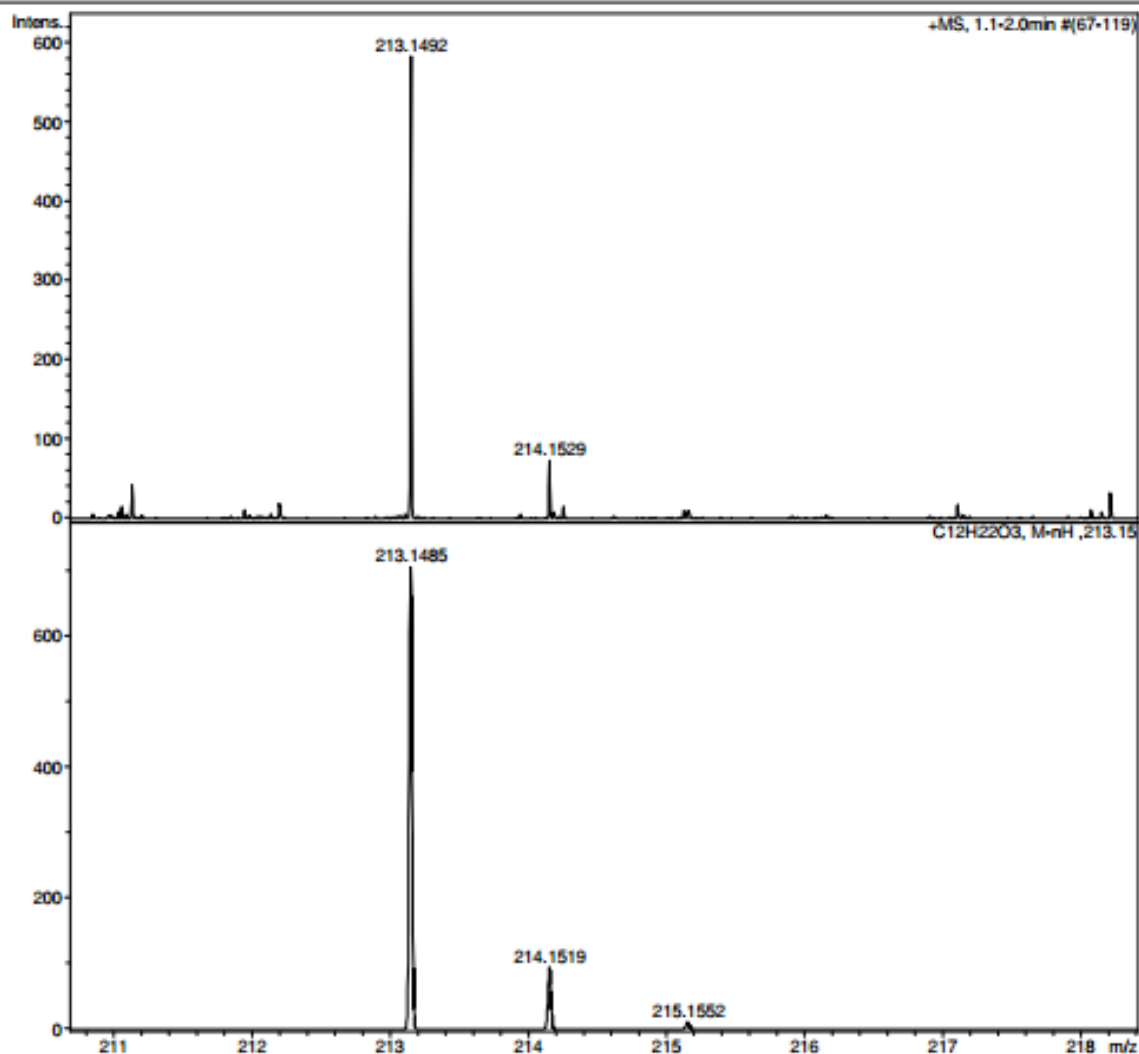

IR 7a-(*tert*-Butylperoxy)octahydrocyclopenta[*b*]pyran (12a)

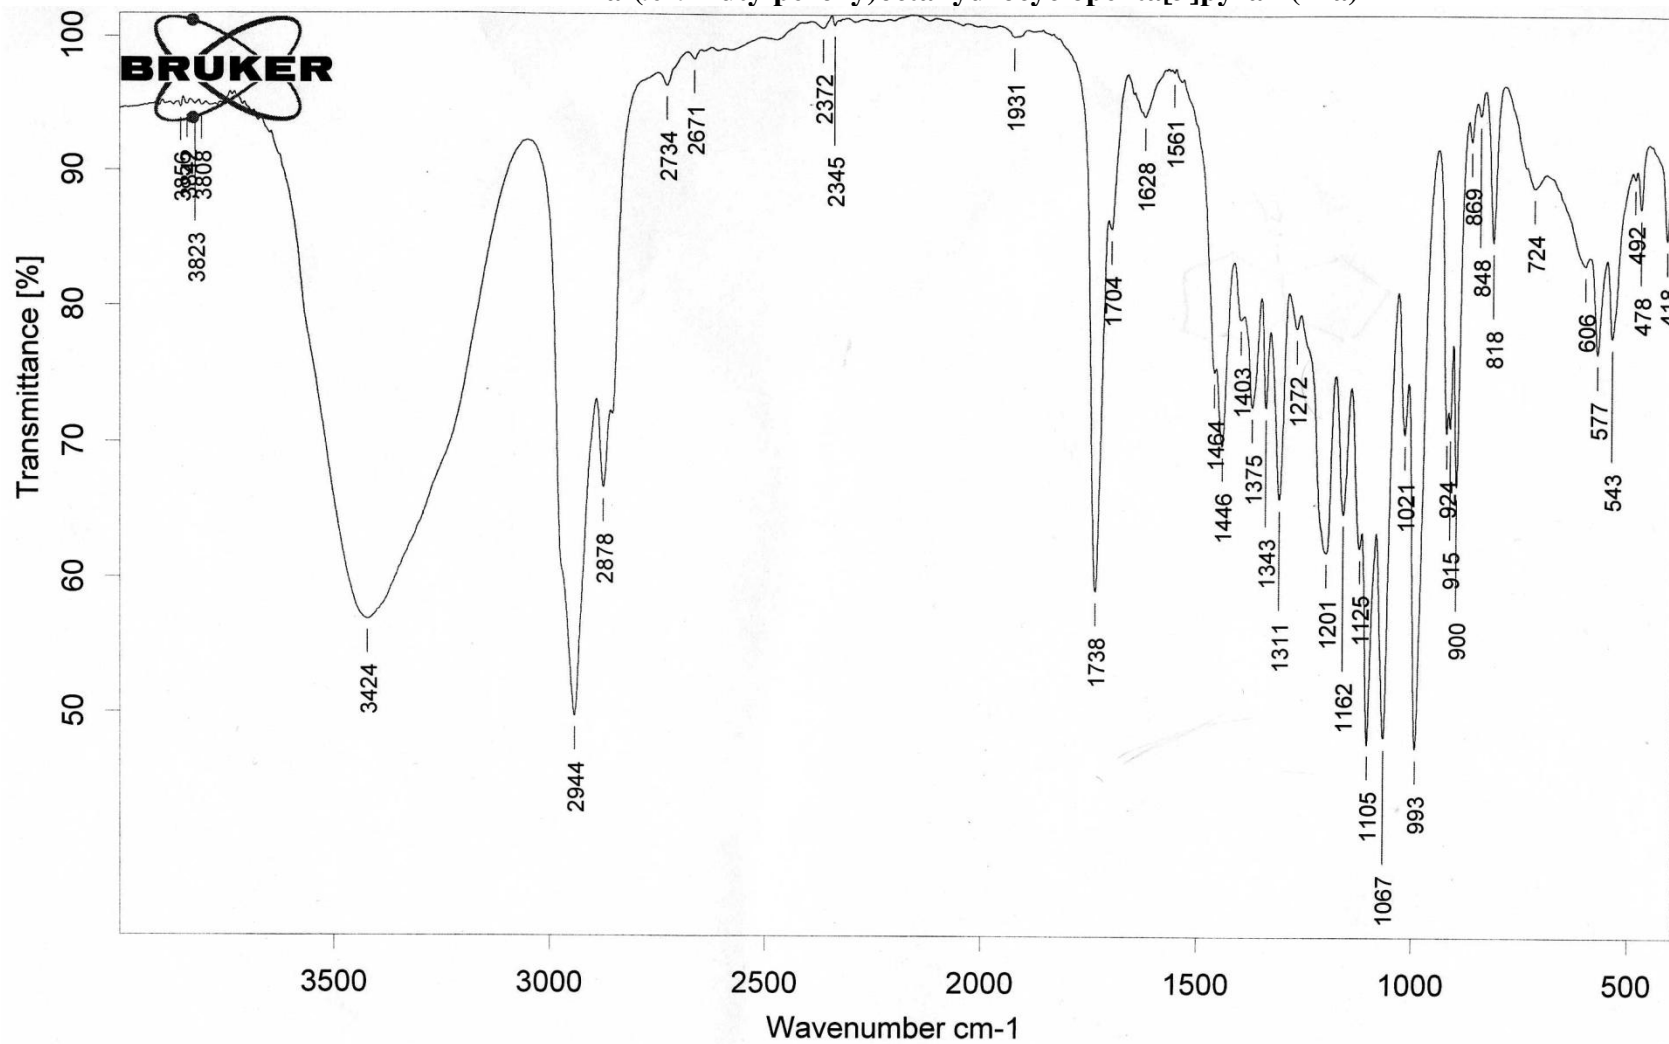

D:\EDL\Zd-170.0 ЗДВИЖКОВ. Zd-170 , прессовка KBr, 1/200.

19.02.2013

# <sup>1</sup>H NMR 8a-(*tert*-Butylperoxy)octahydro-2*H*-chromene (12b)

26 Sep 2013

|                               |        |                       |              |                             |                      |
|-------------------------------|--------|-----------------------|--------------|-----------------------------|----------------------|
| <b>Acquisition Time (sec)</b> | 0.6759 | <b>Comment</b>        | MGOR NH 0051 | <b>Date</b>                 | 11 Oct 2012 12:50:08 |
| <b>File Name</b>              |        |                       |              |                             |                      |
| <b>Frequency (MHz)</b>        | 300.13 | <b>Nucleus</b>        | 1H           | <b>Number of Transients</b> | 1                    |
| <b>Points Count</b>           | 8192   | <b>Pulse Sequence</b> | zgq          | <b>Solvent</b>              | CHLOROFORM-D         |
| <b>Temperature (degree C)</b> | 27.200 |                       |              | <b>Sweep Width (Hz)</b>     | 6009.62              |

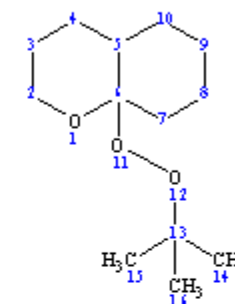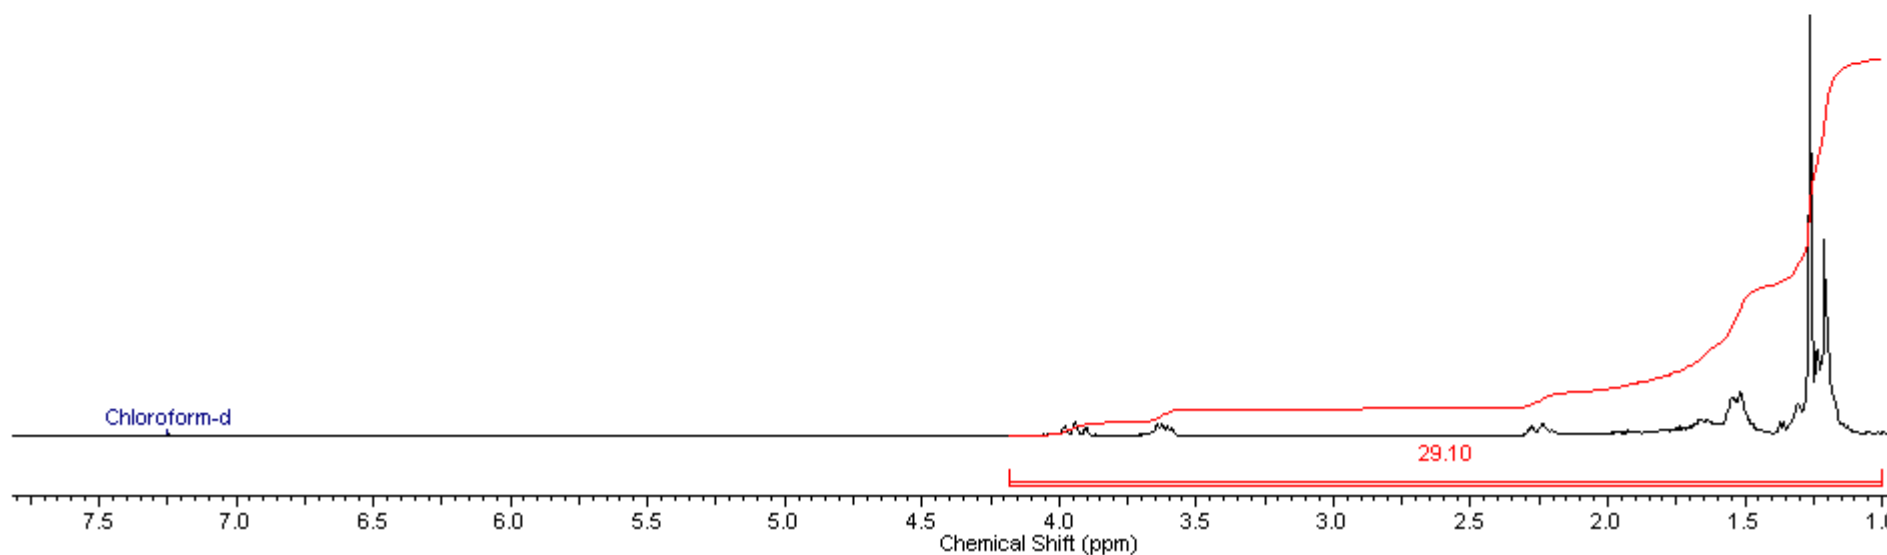

<sup>13</sup>C NMR 8a-(*tert*-Butylperoxy)octahydro-2*H*-chromene (12b)

2 Jul 2013

|                               |            |                             |                         |                              |                        |                               |        |
|-------------------------------|------------|-----------------------------|-------------------------|------------------------------|------------------------|-------------------------------|--------|
| <b>Acquisition Time (sec)</b> | 0.4501     | <b>Comment</b>              | Avance-300, C-13, CDCl3 |                              | <b>Date</b>            | 11 Oct 2012 12:50:08          |        |
| <b>File Name</b>              |            |                             |                         |                              | <b>Frequency (MHz)</b> | 75.48                         |        |
| <b>Nucleus</b>                | 13C        | <b>Number of Transients</b> | 99                      | <b>Original Points Count</b> | 16308                  | <b>Points Count</b>           | 16384  |
| <b>Pulse Sequence</b>         | zgpg30base | <b>Solvent</b>              | CHLOROFORM-D            | <b>Sweep Width (Hz)</b>      | 18115.94               | <b>Temperature (degree C)</b> | 27.400 |

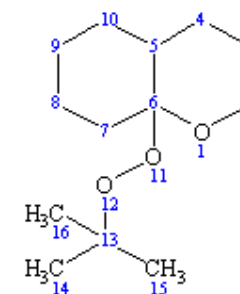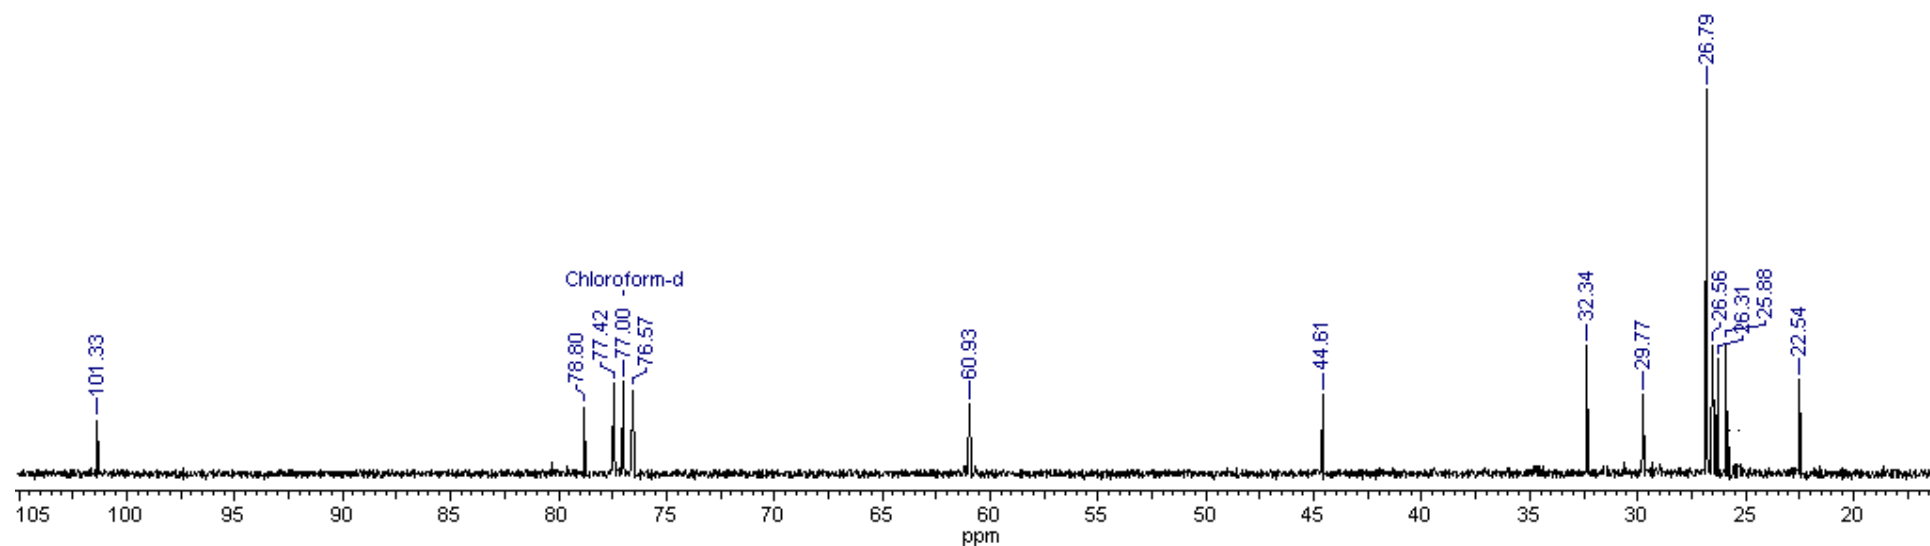

# HRMS 8a-(*tert*-Butylperoxy)octahydro-2*H*-chromene (12b)

## Display Report

### Analysis Info

Analysis Name D:\Data\Ivanova\ZD-192.d  
Method tune\_low.m  
Sample Name /TERN ZD-192  
Comment CH3CN 100%, dil 1000

Acquisition Date 17-Jan-13 17:38:17

Operator BDAL@DE  
Instrument / Ser# micrOTOF 10248

### Acquisition Parameter

|             |            |                      |          |                  |           |
|-------------|------------|----------------------|----------|------------------|-----------|
| Source Type | ESI        | Ion Polarity         | Positive | Set Nebulizer    | 0.4 Bar   |
| Focus       | Not active |                      |          | Set Dry Heater   | 180 °C    |
| Scan Begin  | 50 m/z     | Set Capillary        | 4500 V   | Set Dry Gas      | 4.0 l/min |
| Scan End    | 3000 m/z   | Set End Plate Offset | -500 V   | Set Divert Valve | Waste     |

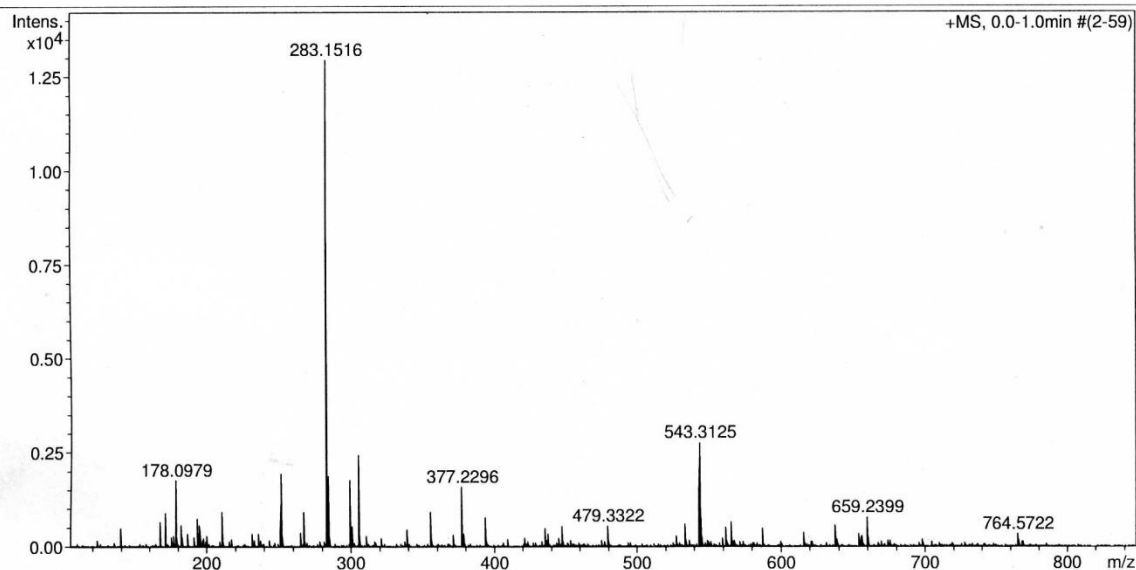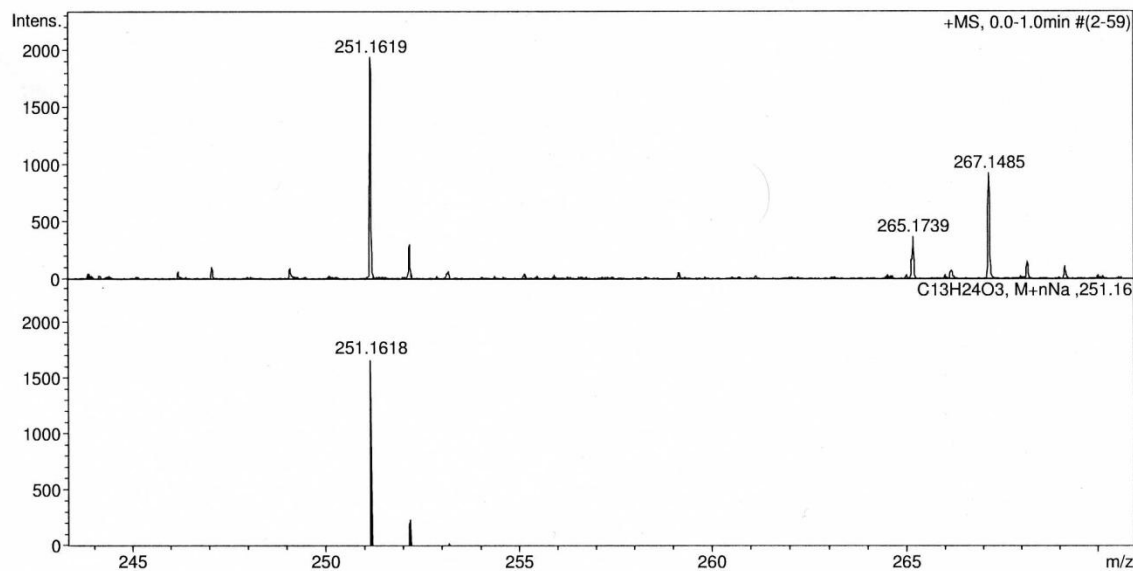

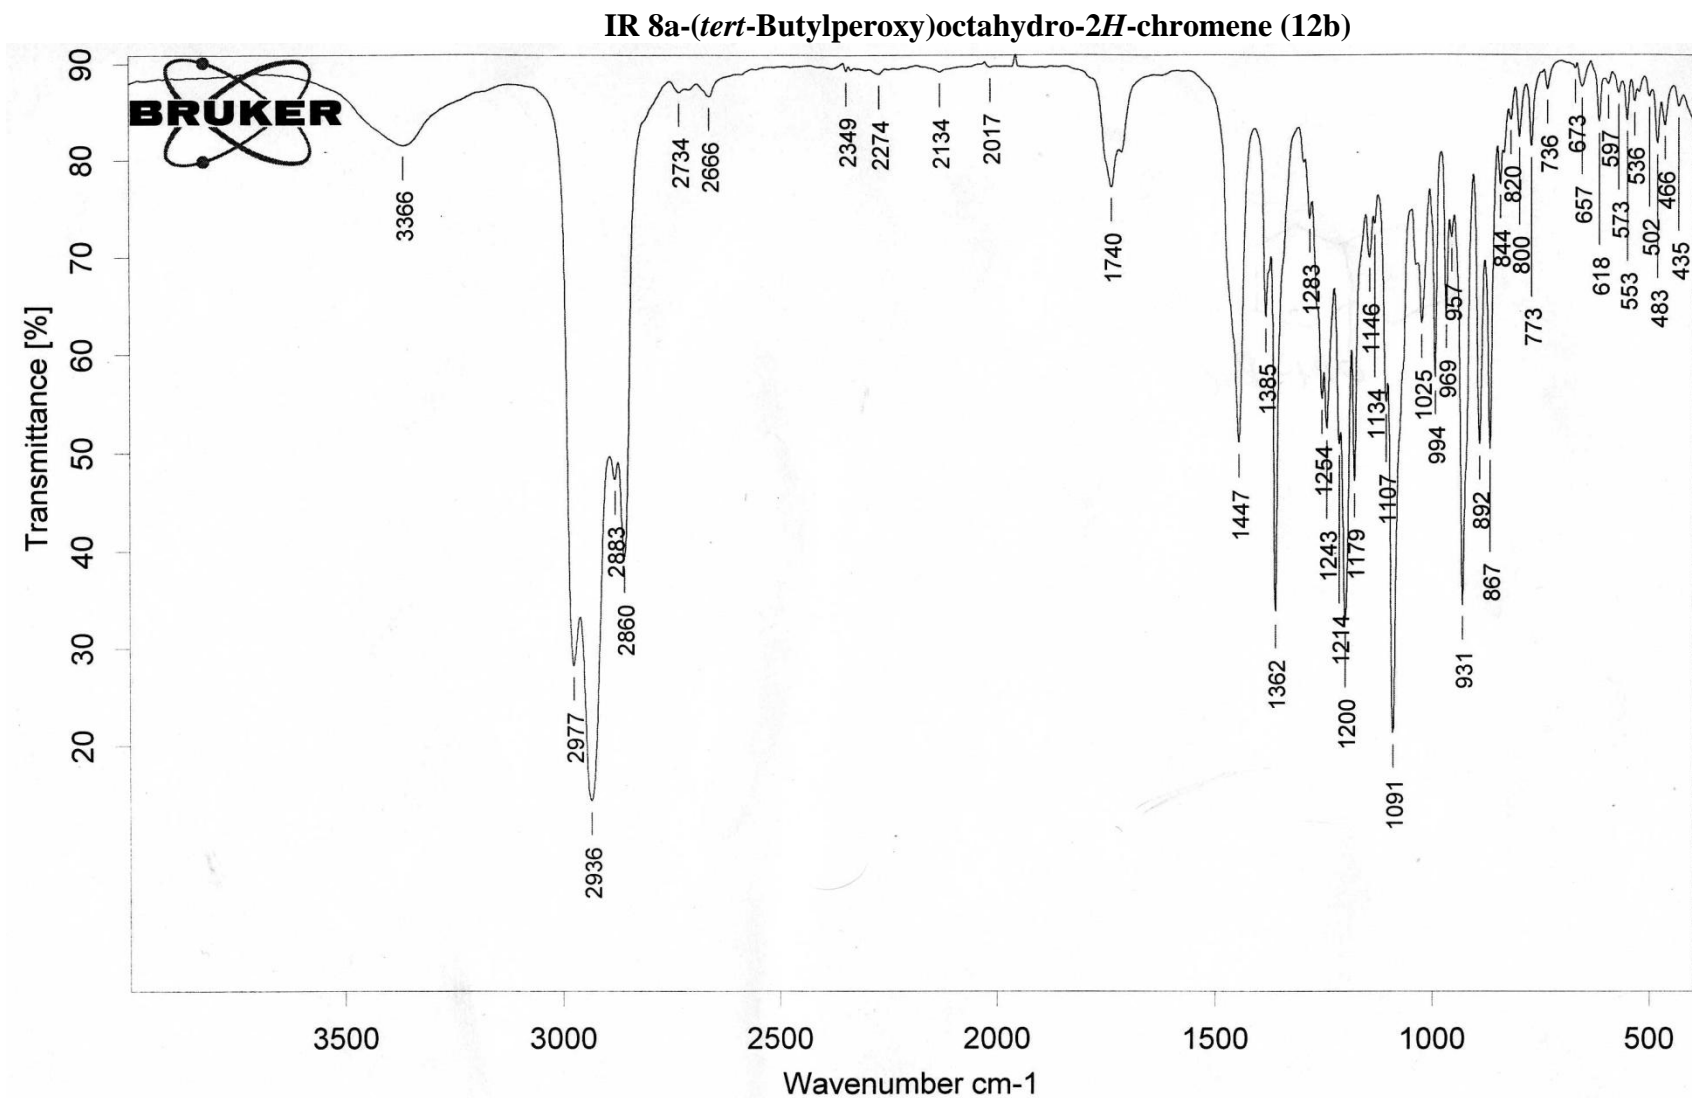

D:\EDL\Zd-108.0      ЗДВИЖКОВ. Zd-108 тонкий слой, пл. KBr

19.02.2013

# <sup>1</sup>H NMR 9a-(*tert*-Butylperoxy)decahydrocyclohepta[*b*]pyran (12c)

2 Jul 2013

|                               |        |                             |              |                              |                      |
|-------------------------------|--------|-----------------------------|--------------|------------------------------|----------------------|
| <b>Acquisition Time (sec)</b> | 0.6759 | <b>Comment</b>              | MVTS 00195   | <b>Date</b>                  | 25 Oct 2012 10:31:28 |
| <b>File Name</b>              |        |                             |              | <b>Frequency (MHz)</b>       | 300.13               |
| <b>Nucleus</b>                | 1H     | <b>Number of Transients</b> | 1            | <b>Original Points Count</b> | 8124                 |
| <b>Pulse Sequence</b>         | zg     | <b>Solvent</b>              | CHLOROFORM-D | <b>Points Count</b>          | 8192                 |
| <b>Temperature (degree C)</b> | 28.200 |                             |              | <b>Sweep Width (Hz)</b>      | 6009.62              |

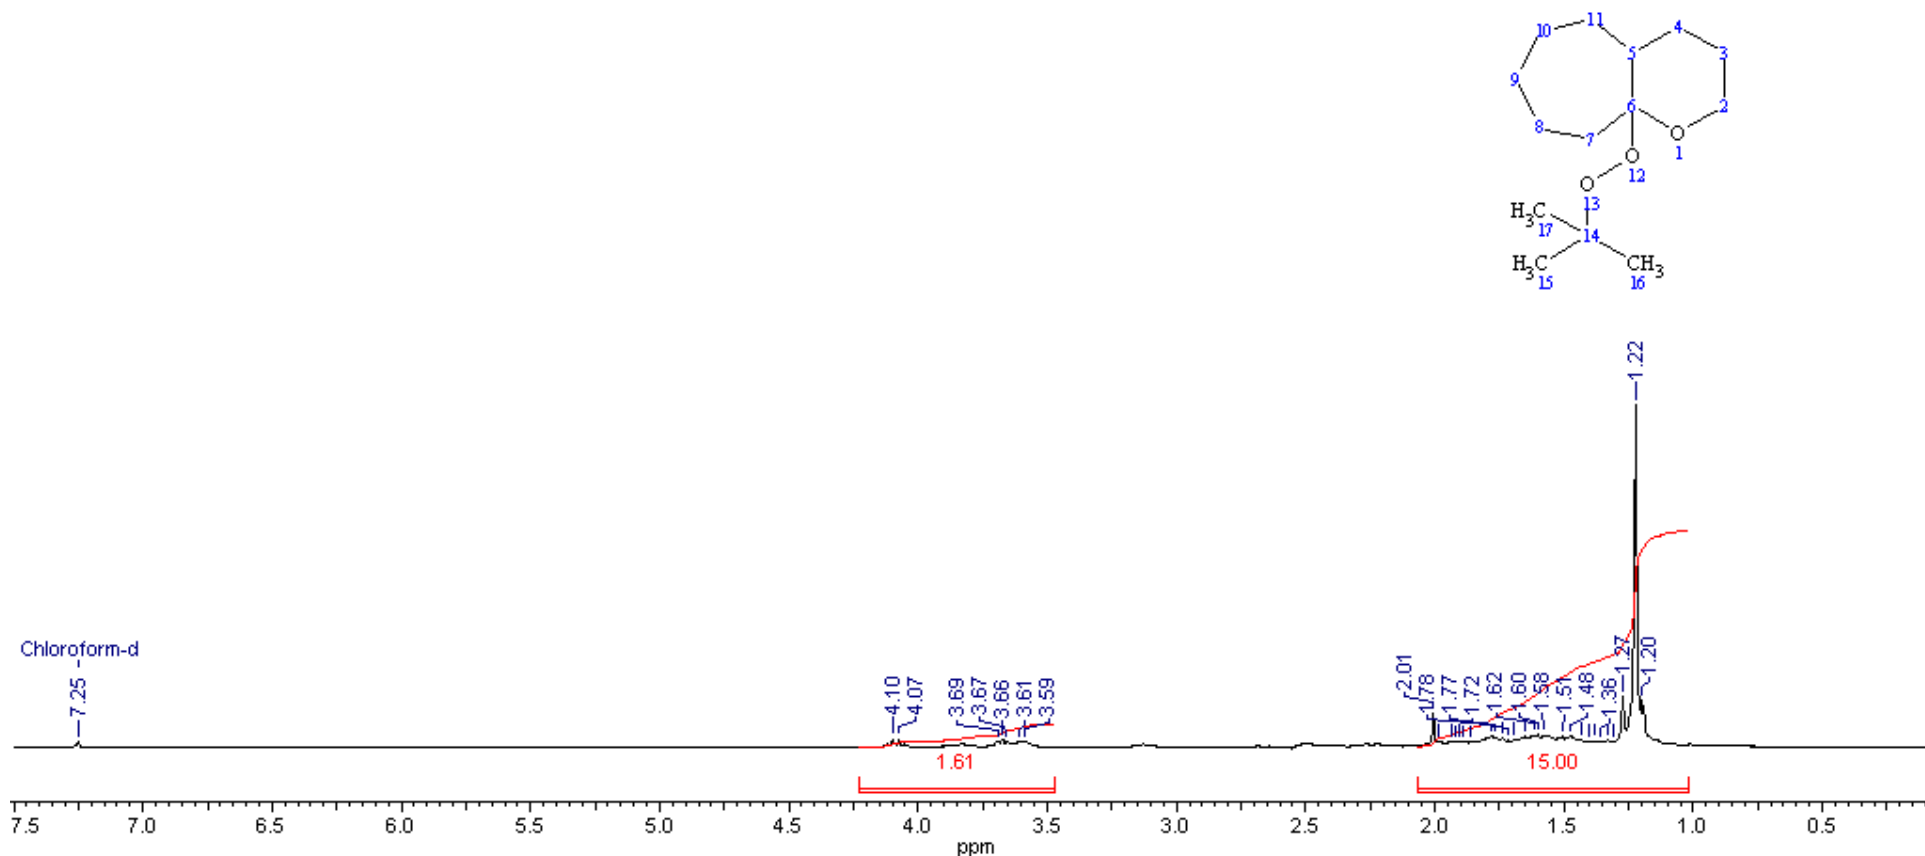

| No. | Annotation   | (ppm) |
|-----|--------------|-------|
| 1   | Chloroform-d | 7.25  |

<sup>13</sup>C NMR 9a-(*tert*-Butylperoxy)decahydrocyclohepta[*b*]pyran (12c)

2 Jul 2013

|                        |            |                      |                         |                       |                 |                        |        |
|------------------------|------------|----------------------|-------------------------|-----------------------|-----------------|------------------------|--------|
| Acquisition Time (sec) | 0.4501     | Comment              | Avance-300, C-13, CDCl3 |                       | Date            | 25 Oct 2012 10:33:36   |        |
| File Name              |            |                      |                         |                       | Frequency (MHz) | 75.48                  |        |
| Nucleus                | 13C        | Number of Transients | 207                     | Original Points Count | 16308           | Points Count           | 16384  |
| Pulse Sequence         | zgpg30base | Solvent              | CHLOROFORM-D            | Sweep Width (Hz)      | 18115.94        | Temperature (degree C) | 28.400 |

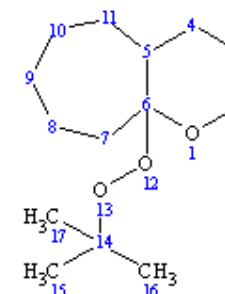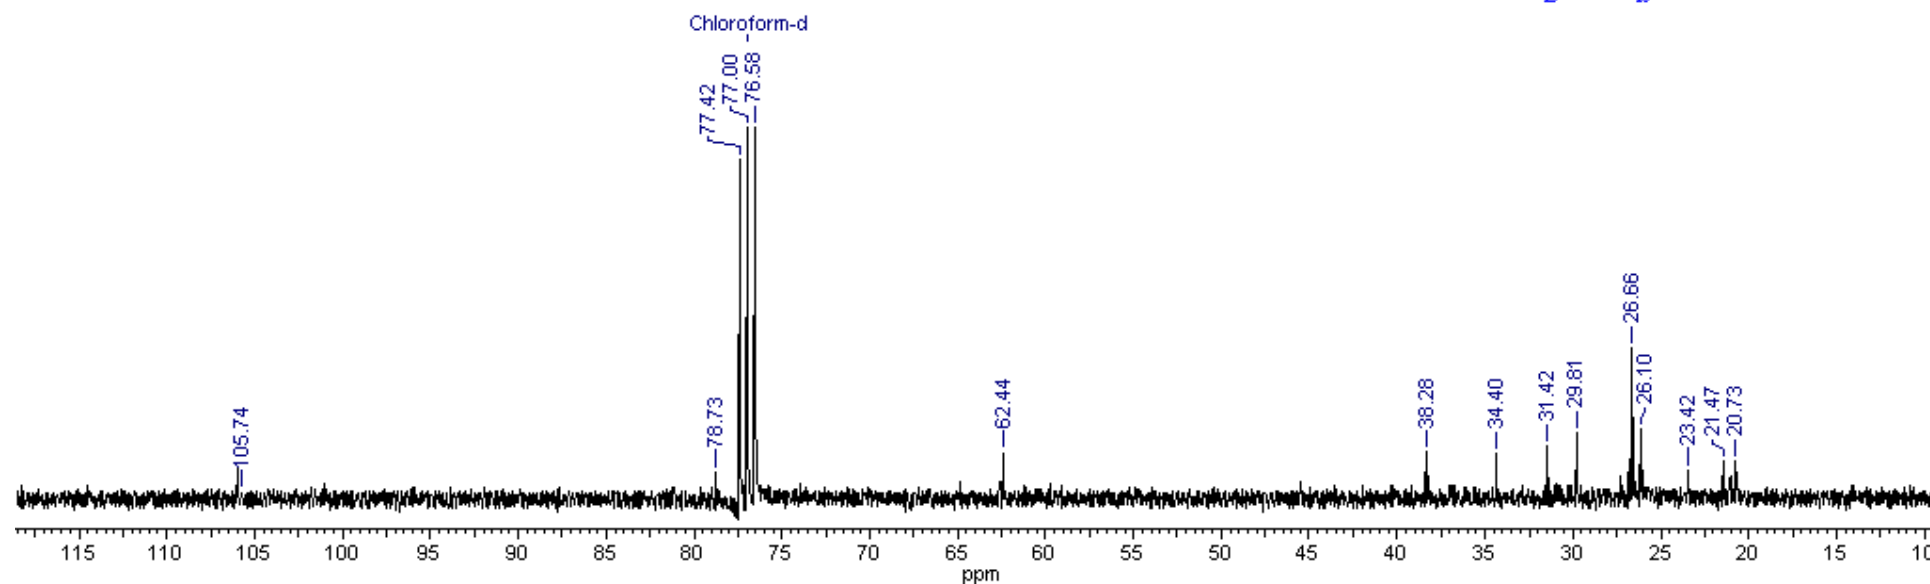



## HRMS 9a-(*tert*-Butylperoxy)decahydrocyclohepta[*b*]pyran (12c)

### Display Report

#### Analysis Info

Analysis Name D:\Data\Ivanova\ZD-130&clb.d  
Method tune\_low.m  
Sample Name /TERN ZD-130&clb  
Comment CH3CN dill 200, clb added

Acquisition Date 28.02.2013 20:00:45

Operator BDAL@DE  
Instrument maXis 43

#### Acquisition Parameter

|             |            |                       |           |                  |           |
|-------------|------------|-----------------------|-----------|------------------|-----------|
| Source Type | ESI        | Ion Polarity          | Positive  | Set Nebulizer    | 0.4 Bar   |
| Focus       | Not active | Set Capillary         | 4500 V    | Set Dry Heater   | 180 °C    |
| Scan Begin  | 50 m/z     | Set End Plate Offset  | -500 V    | Set Dry Gas      | 4.0 l/min |
| Scan End    | 3000 m/z   | Set Collision Cell RF | 300.0 Vpp | Set Divert Valve | Source    |

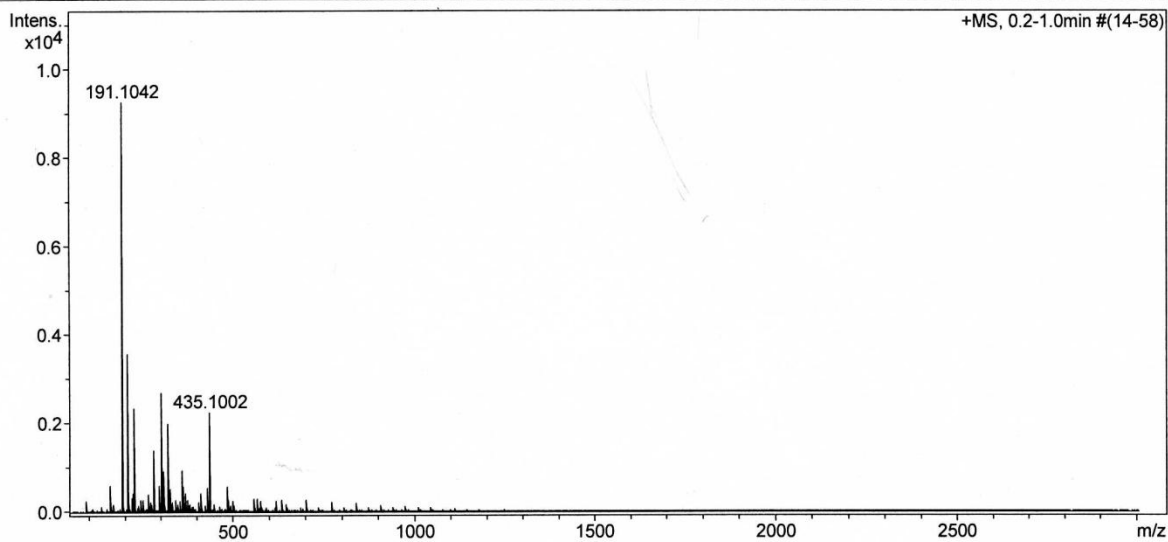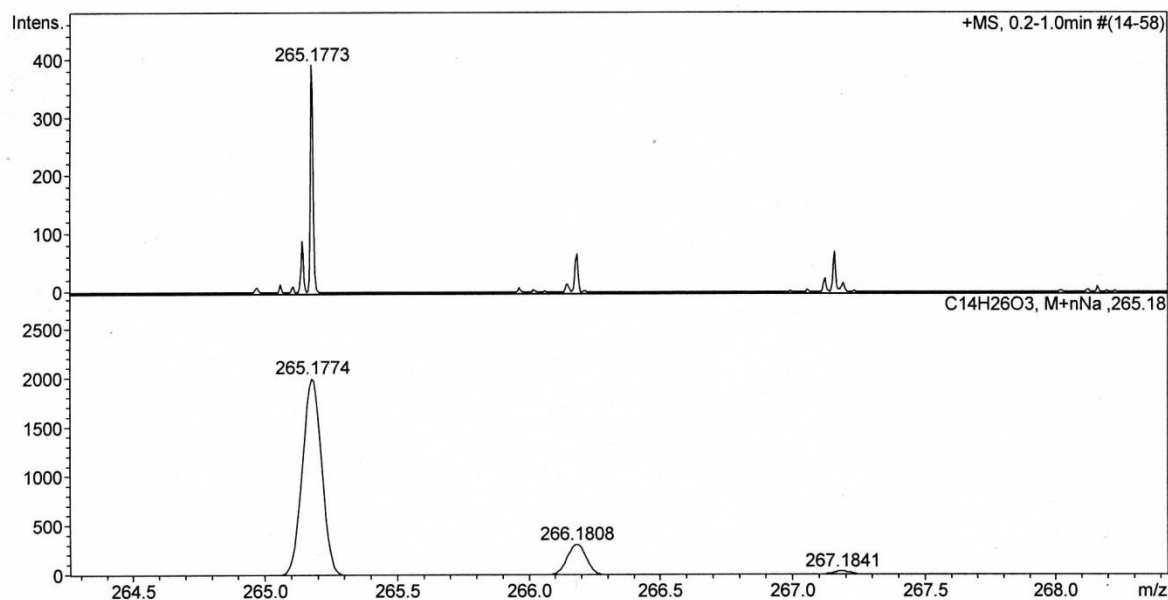

IR 9a-(*tert*-Butylperoxy)decahydrocyclohepta[*b*]pyran (12c)

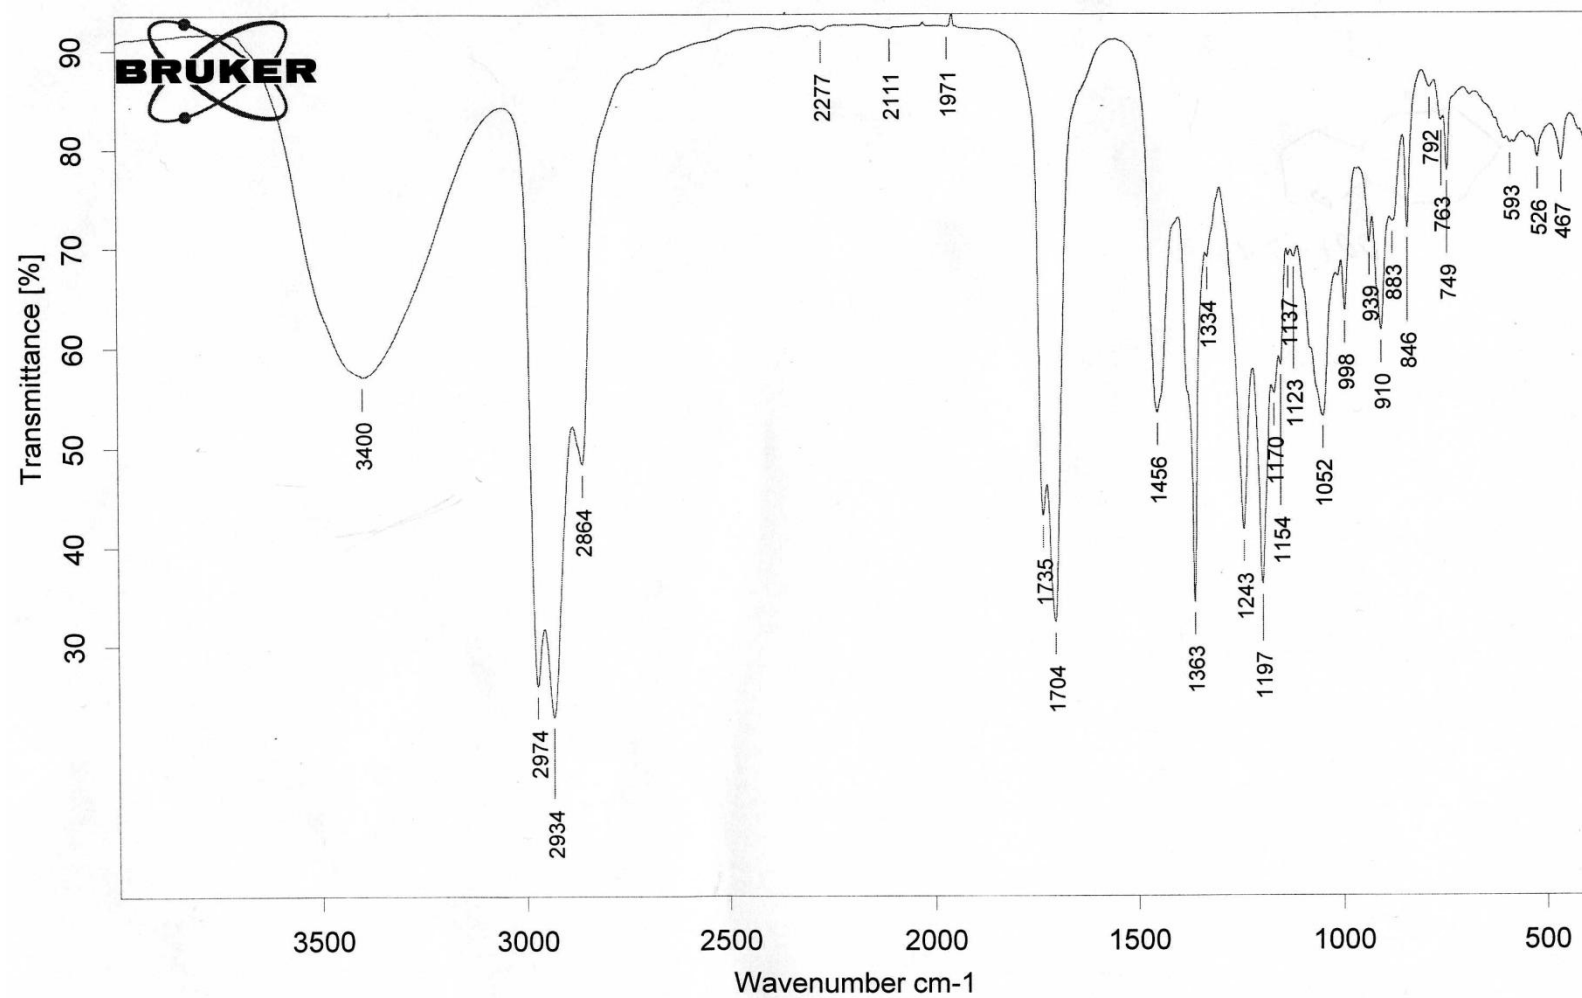

D:\EDL\Zd-130.0

ЗДВИЖКОВ. Zd-130 , тонкий слой, пл. KBr

19.02.2013
